# Supplementary material
Source: publisher site journal article supplement (https://www.dovepress.com/get_supplementary_file.php?f=282125.xlsx)
Supplement: Supplementary file 1 [file get_supplementary_file.php]

## Sheet: Supplementary 1-L_Low VS L_Con
DEGs with statistical differences between Low and Con groups in liver samples
gene_id	gene_name	transcript_id	GO	KEGG	KO_ENTRY	EC	Description	FPKM.L_Low_1	FPKM.L_Low_2	FPKM.L_Con_1	FPKM.L_Con_2	fc	log2(fc)	pval	qval	regulation	significant
ENSRNOG00000046272	LOC103689931	ENSRNOT00000086193;ENSRNOT00000065584	GO:0000122(negative regulation of transcription from RNA polymerase II promoter);GO:0000166(nucleotide binding);GO:0001837(epithelial to mesenchymal transition);GO:0003676(nucleic acid binding);GO:0003677(DNA binding);GO:0003700(transcription factor activity, sequence-specific DNA binding);GO:0003723(RNA binding);GO:0005515(protein binding);GO:0005634(nucleus);GO:0005654(nucleoplasm);GO:0005737(c…	03015(mRNA surveillance pathway);03015(mRNA surveillance pathway)	K14411	NA	PREDICTED: heterogeneous nuclear ribonucleoprotein A/B isoform X2 [Microtus ochrogaster]	25.7726	15.0232	0	0	inf	inf	3.84726e-44	4.61749e-40	up	yes
ENSRNOG00000022863	Lingo4	ENSRNOT00000036656	GO:0007409(axonogenesis);GO:0016021(integral component of membrane);GO:0051965(positive regulation of synapse assembly)	04710(Circadian rhythm);05321(Inflammatiory bowel disease (IBD))	K08534	NA	leucine-rich repeat and immunoglobulin-like domain-containing nogo receptor-interacting protein 4 [Rattus norvegicus]	8.08626	12.7368	0.01871	0.008087	777.067	9.6019	1.61132e-43	9.66953e-40	up	yes
ENSRNOG00000048562	AC109542.1	ENSRNOT00000071028	GO:0001054(RNA polymerase I activity);GO:0001055(RNA polymerase II activity);GO:0001056(RNA polymerase III activity);GO:0003677(DNA binding);GO:0005665(DNA-directed RNA polymerase II, core complex);GO:0005666(DNA-directed RNA polymerase III complex);GO:0005736(DNA-directed RNA polymerase I complex);GO:0006360(transcription from RNA polymerase I promoter);GO:0006366(transcription from RNA polymera…	00230(Purine metabolism);00240(Pyrimidine metabolism);03020(RNA polymerase);04623(Cytosolic DNA-sensing pathway);05016(Huntington's disease);05169(Epstein-Barr virus infection)	K03007	NA	Ab1-108 [Rattus norvegicus]	0	0	14.0852	14.6337	-inf	-inf	1.58031e-33	6.3223e-30	down	yes
ENSRNOG00000056342	RF00003	ENSRNOT00000081473	NA	04110(Cell cycle)	K06628	NA	PREDICTED: inactive serine/threonine-protein kinase TEX14 [Sus scrofa]	72.015	44.5165	0	0	inf	inf	3.14252e-26	9.42914e-23	up	yes
ENSRNOG00000021027	Dbp	ENSRNOT00000091597;ENSRNOT00000028546	GO:0000977(RNA polymerase II regulatory region sequence-specific DNA binding);GO:0001077(transcriptional activator activity, RNA polymerase II core promoter proximal region sequence-specific binding);GO:0001889(liver development);GO:0003700(transcription factor activity, sequence-specific DNA binding);GO:0005634(nucleus);GO:0006357(regulation of transcription from RNA polymerase II promoter);GO:0…	04711(Circadian rhythm - fly);04711(Circadian rhythm - fly)	K09057	NA	D-binding protein 4 [Rattus norvegicus]	3.65495	3.35996	153.642	117.888	0.0258348	-5.27454	2.93733e-25	7.05077e-22	down	yes
ENSRNOG00000001160	NEWGENE_1586233	ENSRNOT00000001534;ENSRNOT00000079043	GO:0002039(p53 binding);GO:0005515(protein binding);GO:0005739(mitochondrion);GO:0005758(mitochondrial intermembrane space);GO:0006977(DNA damage response, signal transduction by p53 class mediator resulting in cell cycle arrest);GO:0015914(phospholipid transport);GO:0030330(DNA damage response, signal transduction by p53 class mediator);GO:0034644(cellular response to UV);GO:0042981(regulation o…	NA	NA	NA	PREDICTED: TP53-regulated inhibitor of apoptosis 1 [Ictidomys tridecemlineatus]	0	0	7.25899	7.04485	-inf	-inf	2.14132e-23	4.05767e-20	down	yes
ENSRNOG00000048402	Igh-6	ENSRNOT00000045874	GO:0003823(antigen binding);GO:0006910(phagocytosis, recognition);GO:0006911(phagocytosis, engulfment);GO:0006958(complement activation, classical pathway);GO:0009897(external side of plasma membrane);GO:0034987(immunoglobulin receptor binding);GO:0042571(immunoglobulin complex, circulating);GO:0042742(defense response to bacterium);GO:0045087(innate immune response);GO:0050853(B cell receptor si…	04064(NF-kappa B signaling pathway);04020(Calcium signaling pathway);04072(Phospholipase D signaling pathway);04151(PI3K-Akt signaling pathway);04145(Phagosome);04640(Hematopoietic cell lineage);04650(Natural killer cell mediated cytotoxicity);04662(B cell receptor signaling pathway);04664(Fc epsilon RI signaling pathway);04666(Fc gamma R-mediated phagocytosis);04672(Intestinal immune network for…	K06856	NA	RecName: Full=Ig gamma-2B chain C region; AltName: Full=Immunoglobulin heavy chain 1a	588.555	203.625	5.24382	5.47238	73.9236	6.20796	2.36658e-23	4.05767e-20	up	yes
ENSRNOG00000046652	Zfp84	ENSRNOT00000072762	GO:0000122(negative regulation of transcription from RNA polymerase II promoter);GO:0003676(nucleic acid binding);GO:0003700(transcription factor activity, sequence-specific DNA binding);GO:0005622(intracellular);GO:0005634(nucleus);GO:0006355(regulation of transcription, DNA-templated);GO:0010646(regulation of cell communication);GO:0022007(convergent extension involved in neural plate elongatio…	04722(Neurotrophin signaling pathway)	K12458	NA	PREDICTED: zinc finger protein 30 homolog [Rattus norvegicus]	0	0	0.628705	0.859759	-inf	-inf	1.2339e-17	1.85116e-14	down	yes
ENSRNOG00000013982	Hsd17b2	ENSRNOT00000018795	GO:0001701(in utero embryonic development);GO:0001890(placenta development);GO:0004303(estradiol 17-beta-dehydrogenase activity);GO:0006702(androgen biosynthetic process);GO:0006703(estrogen biosynthetic process);GO:0016021(integral component of membrane);GO:0032526(response to retinoic acid);GO:0043231(intracellular membrane-bounded organelle);GO:0047035(testosterone dehydrogenase (NAD+) activit…	00140(Steroid hormone biosynthesis);04913(Ovarian Steroidogenesis)	K13368	EC:1.1.1.62;EC:1.1.1.239	Hydroxysteroid (17-beta) dehydrogenase 2 [Rattus norvegicus]	17.1492	25.6447	646.455	404.802	0.0407074	-4.61856	1.58762e-17	2.11717e-14	down	yes
ENSRNOG00000046308	LOC100910308	ENSRNOT00000002890	GO:0004638(phosphoribosylaminoimidazole carboxylase activity);GO:0004639(phosphoribosylaminoimidazolesuccinocarboxamide synthase activity);GO:0005524(ATP binding);GO:0005829(cytosol);GO:0006189('de novo' IMP biosynthetic process);GO:0046084(adenine biosynthetic process)	00230(Purine metabolism)	K01587	EC:4.1.1.21;EC:6.3.2.6	PREDICTED: multifunctional protein ADE2-like [Rattus norvegicus]	0	0	6.19895	3.51578	-inf	-inf	1.83299e-17	2.19996e-14	down	yes
ENSRNOG00000009329	Nr1d1	ENSRNOT00000012537;ENSRNOT00000055333	GO:0000122(negative regulation of transcription from RNA polymerase II promoter);GO:0000790(nuclear chromatin);GO:0000976(transcription regulatory region sequence-specific DNA binding);GO:0000977(RNA polymerase II regulatory region sequence-specific DNA binding);GO:0000978(RNA polymerase II core promoter proximal region sequence-specific DNA binding);GO:0001046(core promoter sequence-specific DNA…	04710(Circadian rhythm);04710(Circadian rhythm)	K03728	NA	nuclear receptor subfamily 1, group D, member 1, isoform CRA_b [Rattus norvegicus]	7.66446	5.30526	86.9103	99.0337	0.0697507	-3.84165	1.0254e-16	1.11881e-13	down	yes
ENSRNOG00000045772	A2m	ENSRNOT00000075799	GO:0001553(luteinization);GO:0001869(negative regulation of complement activation, lectin pathway);GO:0002020(protease binding);GO:0002438(acute inflammatory response to antigenic stimulus);GO:0004866(endopeptidase inhibitor activity);GO:0004867(serine-type endopeptidase inhibitor activity);GO:0005102(receptor binding);GO:0005615(extracellular space);GO:0006953(acute-phase response);GO:0007584(re…	04610(Complement and coagulation cascades)	K03910	NA	alpha-2-macroglobulin precursor [Rattus norvegicus]	9.33932	11.3447	0.702885	0.333605	19.9558	4.31874	3.93227e-16	3.93292e-13	up	yes
ENSRNOG00000001052	Slc25a30	ENSRNOT00000001389	GO:0003735(structural constituent of ribosome);GO:0005739(mitochondrion);GO:0005743(mitochondrial inner membrane);GO:0006412(translation);GO:0006839(mitochondrial transport);GO:0016021(integral component of membrane);GO:0031966(mitochondrial membrane);GO:0055085(transmembrane transport)	03320(PPAR signaling pathway);05016(Huntington's disease)	K08769	NA	PREDICTED: kidney mitochondrial carrier protein 1 isoform X1 [Rattus norvegicus]	1.93718	2.15989	22.9427	48.9885	0.0569582	-4.13395	8.13849e-16	7.51371e-13	down	yes
ENSRNOG00000010799	Noct	ENSRNOT00000014348	GO:0000290(deadenylation-dependent decapping of nuclear-transcribed mRNA);GO:0000932(cytoplasmic mRNA processing body);GO:0003729(mRNA binding);GO:0004535(poly(A)-specific ribonuclease activity);GO:0005634(nucleus);GO:0005737(cytoplasm);GO:0006397(mRNA processing);GO:0009991(response to extracellular stimulus);GO:0010629(negative regulation of gene expression);GO:0032496(response to lipopolysacch…	03018(RNA degradation)	K12603	EC:3.1.13.4	nocturnin [Rattus norvegicus]	0.831952	0.861026	10.9246	10.9678	0.0773317	-3.6928	4.66084e-15	3.99567e-12	down	yes
ENSRNOG00000048613	Timm17b	ENSRNOT00000066373	GO:0005739(mitochondrion);GO:0005743(mitochondrial inner membrane);GO:0005744(mitochondrial inner membrane presequence translocase complex);GO:0015266(protein channel activity);GO:0015450(P-P-bond-hydrolysis-driven protein transmembrane transporter activity);GO:0030150(protein import into mitochondrial matrix);GO:0031305(integral component of mitochondrial inner membrane)	NA	NA	NA	mitochondrial import inner membrane translocase subunit Tim17-B [Rattus norvegicus]	0	0	20.2613	4.05903	-inf	-inf	1.52759e-14	1.22227e-11	down	yes
ENSRNOG00000014739	Wfdc2	ENSRNOT00000019804;ENSRNOT00000039664	GO:0004867(serine-type endopeptidase inhibitor activity);GO:0004869(cysteine-type endopeptidase inhibitor activity);GO:0010951(negative regulation of endopeptidase activity);GO:0019828(aspartic-type endopeptidase inhibitor activity);GO:0070062(extracellular exosome);GO:0070062(extracellular exosome)	NA	NA	NA	epididymal secretory protein 4 [Rattus norvegicus]	0.78305	1.19964	18.0412	25.1739	0.0458796	-4.446	2.48524e-14	1.86424e-11	down	yes
ENSRNOG00000018649	Slc35c2	ENSRNOT00000025238;ENSRNOT00000087646	GO:0005793(endoplasmic reticulum-Golgi intermediate compartment);GO:0005801(cis-Golgi network);GO:0010629(negative regulation of gene expression);GO:0015786(UDP-glucose transport);GO:0016021(integral component of membrane);GO:0036065(fucosylation);GO:0036066(protein O-linked fucosylation);GO:0045747(positive regulation of Notch signaling pathway);GO:0045747(positive regulation of Notch signaling …	NA	NA	NA	solute carrier family 35 member C2 [Rattus norvegicus]	6.17923	6.91724	64.4141	79.8771	0.0907641	-3.46173	3.28961e-14	2.32246e-11	down	yes
ENSRNOG00000026672	MGC94199	ENSRNOT00000037547	GO:0005737(cytoplasm);GO:0005886(plasma membrane);GO:0030054(cell junction)	NA	NA	NA	protein C8orf37 homolog [Rattus norvegicus]	1.10734	2.17114	0	0	inf	inf	9.40265e-14	6.26948e-11	up	yes
ENSRNOG00000001388	Sds	ENSRNOT00000001876;ENSRNOT00000001875	GO:0003941(L-serine ammonia-lyase activity);GO:0004794(L-threonine ammonia-lyase activity);GO:0005575(cellular_component);GO:0005737(cytoplasm);GO:0005739(mitochondrion);GO:0006094(gluconeogenesis);GO:0006520(cellular amino acid metabolic process);GO:0006565(L-serine catabolic process);GO:0030170(pyridoxal phosphate binding);GO:0031667(response to nutrient levels);GO:0033590(response to cobalamin…	01200(Carbon metabolism);01230(Biosynthesis of amino acids);00260(Glycine, serine and threonine metabolism);00270(Cysteine and methionine metabolism);00290(Valine, leucine and isoleucine biosynthesis);00290(Valine, leucine and isoleucine biosynthesis)	K17989	EC:4.3.1.17;EC:4.3.1.19	RecName: Full=L-serine dehydratase/L-threonine deaminase; Short=SDH; AltName: Full=L-serine deaminase; AltName: Full=L-threonine dehydratase; Short=TDH	5.41334	15.7284	214.475	527.226	0.0285044	-5.13267	1.80134e-13	1.13788e-10	down	yes
ENSRNOG00000010528	LOC100911166	ENSRNOT00000014129	GO:0003674(molecular_function);GO:0003723(RNA binding);GO:0005575(cellular_component);GO:0005739(mitochondrion);GO:0008150(biological_process);GO:0009982(pseudouridine synthase activity);GO:0019239(deaminase activity);GO:0031119(tRNA pseudouridine synthesis);GO:0044822(poly(A) RNA binding)	NA	NA	NA	RNA pseudouridylate synthase domain-containing protein 2 [Rattus norvegicus]	0	0	0.605625	0.792446	-inf	-inf	2.39295e-13	1.43601e-10	down	yes
ENSRNOG00000021201	Txnip	ENSRNOT00000028793	GO:0000122(negative regulation of transcription from RNA polymerase II promoter);GO:0003674(molecular_function);GO:0004857(enzyme inhibitor activity);GO:0005634(nucleus);GO:0005737(cytoplasm);GO:0005758(mitochondrial intermembrane space);GO:0006351(transcription, DNA-templated);GO:0006606(protein import into nucleus);GO:0006979(response to oxidative stress);GO:0009612(response to mechanical stimu…	NA	NA	NA	thioredoxin-interacting protein [Rattus norvegicus]	163.894	169.766	16.8734	18.4336	9.45027	3.24035	4.12221e-13	2.35594e-10	up	yes
ENSRNOG00000048248	LOC100910446	ENSRNOT00000072943	GO:0000149(SNARE binding);GO:0005484(SNAP receptor activity);GO:0006886(intracellular protein transport);GO:0006906(vesicle fusion);GO:0012505(endomembrane system);GO:0016021(integral component of membrane);GO:0031201(SNARE complex);GO:0048278(vesicle docking)	04130(SNARE interactions in vesicular transport);04145(Phagosome)	K08488	NA	PREDICTED: syntaxin-7-like [Rattus norvegicus]	0	0	1.7721	2.8568	-inf	-inf	4.97017e-13	2.71146e-10	down	yes
ENSRNOG00000018413	Per3	ENSRNOT00000024932;ENSRNOT00000092912;ENSRNOT00000092747;ENSRNOT00000093114;ENSRNOT00000092840;ENSRNOT00000093100;ENSRNOT00000092923;ENSRNOT00000093063	GO:0000122(negative regulation of transcription from RNA polymerase II promoter);GO:0005634(nucleus);GO:0005737(cytoplasm);GO:0006351(transcription, DNA-templated);GO:0006355(regulation of transcription, DNA-templated);GO:0007623(circadian rhythm);GO:0019900(kinase binding);GO:0031625(ubiquitin protein ligase binding);GO:0032922(circadian regulation of gene expression);GO:0045187(regulation of ci…	04710(Circadian rhythm);04713(Circadian entrainment);05168(Herpes simplex infection);05168(Herpes simplex infection)	K02633	NA	RecName: Full=Period circadian protein homolog 3; Short=rPER3; AltName: Full=Circadian clock protein PERIOD 3	0.547769	0.790052	9.22053	6.12996	0.0871517	-3.52033	7.63783e-13	3.98562e-10	down	yes
ENSRNOG00000000556	Nodal	ENSRNOT00000000672	GO:0000122(negative regulation of transcription from RNA polymerase II promoter);GO:0001701(in utero embryonic development);GO:0001702(gastrulation with mouth forming second);GO:0001707(mesoderm formation);GO:0001829(trophectodermal cell differentiation);GO:0001831(trophectodermal cellular morphogenesis);GO:0001842(neural fold formation);GO:0001889(liver development);GO:0001890(placenta developme…	04350(TGF-beta signaling pathway);04550(Signaling pathways regulating pluripotency of stem cells)	K04666	NA	nodal homolog precursor [Rattus norvegicus]	1.67688	0.804998	0	0	inf	inf	1.29685e-12	6.48535e-10	up	yes
ENSRNOG00000019723	LOC100910990	ENSRNOT00000047246	GO:0000166(nucleotide binding);GO:0003676(nucleic acid binding);GO:0005654(nucleoplasm);GO:0044822(poly(A) RNA binding)	NA	NA	NA	RNA-binding protein 12 [Rattus norvegicus]	0.625322	0.511229	0	0	inf	inf	1.65941e-12	7.96652e-10	up	yes
ENSRNOG00000019422	Egr1	ENSRNOT00000026303	GO:0000122(negative regulation of transcription from RNA polymerase II promoter);GO:0000976(transcription regulatory region sequence-specific DNA binding);GO:0000977(RNA polymerase II regulatory region sequence-specific DNA binding);GO:0000979(RNA polymerase II core promoter sequence-specific DNA binding);GO:0000982(transcription factor activity, RNA polymerase II core promoter proximal region se…	05020(Prion diseases);04933(AGE-RAGE signaling pathway in diabetic complications);05166(HTLV-I infection)	K09203	NA	early growth response 1 [Rattus norvegicus]	128.487	169.821	10.8704	18.2867	10.2311	3.35488	3.50398e-12	1.61749e-09	up	yes
ENSRNOG00000001159	Tff3	ENSRNOT00000066266;ENSRNOT00000090275	GO:0005515(protein binding);GO:0005578(proteinaceous extracellular matrix);GO:0005737(cytoplasm);GO:0010906(regulation of glucose metabolic process);GO:0030141(secretory granule);GO:0042060(wound healing);GO:0043434(response to peptide hormone);GO:0070062(extracellular exosome);GO:0070062(extracellular exosome)	NA	NA	NA	trefoil factor 3 precursor [Rattus norvegicus]	14.9477	19.2162	0.659689	0.18861	40.2734	5.33175	4.18052e-12	1.85832e-09	up	yes
ENSRNOG00000030463	Faim	ENSRNOT00000045329;ENSRNOT00000045821	GO:0005737(cytoplasm);GO:0006915(apoptotic process);GO:0007249(I-kappaB kinase/NF-kappaB signaling);GO:0043066(negative regulation of apoptotic process);GO:0050769(positive regulation of neurogenesis);GO:1902042(negative regulation of extrinsic apoptotic signaling pathway via death domain receptors);GO:1902042(negative regulation of extrinsic apoptotic signaling pathway via death domain receptors)	NA	NA	NA	PREDICTED: fas apoptotic inhibitory molecule 1 isoform X1 [Rattus norvegicus]	1.8565	1.4073	0	0	inf	inf	8.86801e-12	3.80121e-09	up	yes
ENSRNOG00000012325	Adk	ENSRNOT00000080274;ENSRNOT00000016709	GO:0004001(adenosine kinase activity);GO:0005524(ATP binding);GO:0005634(nucleus);GO:0005654(nucleoplasm);GO:0005737(cytoplasm);GO:0005829(cytosol);GO:0006166(purine ribonucleoside salvage);GO:0006167(AMP biosynthetic process);GO:0006175(dATP biosynthetic process);GO:0010613(positive regulation of cardiac muscle hypertrophy);GO:0016310(phosphorylation);GO:0032922(circadian regulation of gene expr…	00230(Purine metabolism);00230(Purine metabolism)	K00856	EC:2.7.1.20	adenosine kinase [Rattus norvegicus]	12.3171	7.41024	77.0025	84.0137	0.122518	-3.02893	2.97327e-11	1.23052e-08	down	yes
ENSRNOG00000059271	AABR07058985.2	ENSRNOT00000082747;ENSRNOT00000086366	GO:0003677(DNA binding);GO:0005515(protein binding);GO:0005634(nucleus);GO:0006351(transcription, DNA-templated);GO:0006355(regulation of transcription, DNA-templated);GO:0007338(single fertilization);GO:0008168(methyltransferase activity);GO:0008270(zinc ion binding);GO:0010468(regulation of gene expression);GO:0016568(chromatin modification);GO:0016571(histone methylation);GO:0016740(transferas…	00310(Lysine degradation);00310(Lysine degradation)	K09188	EC:2.1.1.43	PREDICTED: LOW QUALITY PROTEIN: histone-lysine N-methyltransferase 2C isoform X1 [Rattus norvegicus]	0	0	0.40768	0.901558	-inf	-inf	3.76008e-11	1.50428e-08	down	yes
ENSRNOG00000010282	Ninj2	ENSRNOT00000013721	GO:0007155(cell adhesion);GO:0016021(integral component of membrane);GO:0042246(tissue regeneration)	NA	NA	NA	ninjurin-2 [Rattus norvegicus]	0.065319	0.162507	2.59836	8.27709	0.0209486	-5.577	6.38628e-11	2.47252e-08	down	yes
ENSRNOG00000013410	Spink1l	ENSRNOT00000017969	GO:0001669(acrosomal vesicle);GO:0004867(serine-type endopeptidase inhibitor activity);GO:0005615(extracellular space);GO:0007568(aging);GO:0060046(regulation of acrosome reaction);GO:1900004(negative regulation of serine-type endopeptidase activity)	04630(Jak-STAT signaling pathway);04060(Cytokine-cytokine receptor interaction);04620(Toll-like receptor signaling pathway);04622(RIG-I-like receptor signaling pathway);05168(Herpes simplex infection)	K05425	NA	RecName: Full=Serine protease inhibitor Kazal-type 1-like; AltName: Full=Calcium transport inhibitor; AltName: Full=Caltrin; AltName: Full=Pancreatic secretory trypsin inhibitor II; Short=PSTI-II; Flags: Precursor	170.03	58.3743	8.34769	11.4068	11.5622	3.53134	8.27559e-11	3.10386e-08	up	yes
ENSRNOG00000018494	Ppp1r3c	ENSRNOT00000024941	GO:0004721(phosphoprotein phosphatase activity);GO:0005977(glycogen metabolic process);GO:0005978(glycogen biosynthetic process);GO:0005979(regulation of glycogen biosynthetic process);GO:0005981(regulation of glycogen catabolic process);GO:0006470(protein dephosphorylation);GO:0019888(protein phosphatase regulator activity);GO:0019899(enzyme binding);GO:0019903(protein phosphatase binding);GO:00…	04910(Insulin signaling pathway);04931(Insulin resistance)	K07189	NA	rCG48518 [Rattus norvegicus]	48.179	47.6682	7.63777	6.55703	6.75228	2.75537	2.06064e-10	7.4945e-08	up	yes
ENSRNOG00000011330	Ces2a	ENSRNOT00000015451	GO:0001523(retinoid metabolic process);GO:0043231(intracellular membrane-bounded organelle);GO:0052689(carboxylic ester hydrolase activity)	00983(Drug metabolism - other enzymes)	K03927	EC:3.1.1.1;EC:3.1.1.84	carboxylesterase 2A precursor [Rattus norvegicus]	17.2009	20.4855	187.914	120.999	0.121997	-3.03509	2.24026e-10	7.90811e-08	down	yes
ENSRNOG00000000279	Rtn4ip1	ENSRNOT00000000304	GO:0005739(mitochondrion);GO:0008270(zinc ion binding);GO:0016491(oxidoreductase activity);GO:0055114(oxidation-reduction process)	NA	NA	NA	reticulon-4-interacting protein 1, mitochondrial [Rattus norvegicus]	1.05028	0.743043	6.26106	8.28418	0.123293	-3.01984	3.32923e-10	1.14164e-07	down	yes
ENSRNOG00000016740	Fam210a	ENSRNOT00000084902;ENSRNOT00000022519	GO:0005739(mitochondrion);GO:0016021(integral component of membrane);GO:0016021(integral component of membrane)	NA	NA	NA	protein FAM210A [Rattus norvegicus]	3.88881	3.66208	0.617192	0.361524	7.7151	2.94768	3.51274e-10	1.17111e-07	up	yes
ENSRNOG00000046797	Rpusd2	ENSRNOT00000072130	GO:0003674(molecular_function);GO:0003723(RNA binding);GO:0005575(cellular_component);GO:0005739(mitochondrion);GO:0008150(biological_process);GO:0009982(pseudouridine synthase activity);GO:0019239(deaminase activity);GO:0031119(tRNA pseudouridine synthesis);GO:0044822(poly(A) RNA binding)	NA	NA	NA	RNA pseudouridylate synthase domain-containing protein 2 [Rattus norvegicus]	0	0	0.507116	0.668303	-inf	-inf	4.08138e-10	1.32391e-07	down	yes
ENSRNOG00000054495	Cldn2	ENSRNOT00000083566;ENSRNOT00000090928	GO:0005198(structural molecule activity);GO:0005886(plasma membrane);GO:0005923(bicellular tight junction);GO:0016021(integral component of membrane);GO:0016338(calcium-independent cell-cell adhesion via plasma membrane cell-adhesion molecules);GO:0042802(identical protein binding);GO:0070062(extracellular exosome);GO:0070062(extracellular exosome)	04514(Cell adhesion molecules (CAMs));04530(Tight junction);04670(Leukocyte transendothelial migration);05160(Hepatitis C);05160(Hepatitis C)	K06087	NA	claudin-2 [Rattus norvegicus]	24.8079	19.8408	3.62074	1.95807	8.00326	3.00059	4.38642e-10	1.38542e-07	up	yes
ENSRNOG00000050511	LOC100910838	ENSRNOT00000059602	GO:0005622(intracellular);GO:0014065(phosphatidylinositol 3-kinase signaling);GO:0048812(neuron projection morphogenesis)	NA	NA	NA	PREDICTED: neuronal tyrosine-phosphorylated phosphoinositide-3-kinase adapter 1 isoform X1 [Rattus norvegicus]	0.515908	0.475045	0	0	inf	inf	1.20836e-09	3.71865e-07	up	yes
ENSRNOG00000020467	Nrep	ENSRNOT00000027739	GO:0005634(nucleus);GO:0005737(cytoplasm);GO:0017015(regulation of transforming growth factor beta receptor signaling pathway);GO:0031103(axon regeneration);GO:0045664(regulation of neuron differentiation)	NA	NA	NA	neuronal regeneration-related protein [Rattus norvegicus]	0.573294	1.76501	17.6699	24.3501	0.0556474	-4.16754	4.63882e-09	1.39188e-06	down	yes
ENSRNOG00000019445	Msln	ENSRNOT00000026395	GO:0003674(molecular_function);GO:0005615(extracellular space);GO:0005794(Golgi apparatus);GO:0005886(plasma membrane);GO:0007160(cell-matrix adhesion);GO:0009986(cell surface);GO:0031016(pancreas development);GO:0031225(anchored component of membrane)	00620(Pyruvate metabolism)	K01069	EC:3.1.2.6	PREDICTED: mesothelin isoform X1 [Rattus norvegicus]	8.11005	20.5332	1.70301	1.56776	8.75735	3.13049	5.28632e-09	1.54747e-06	up	yes
ENSRNOG00000017244	Rnf186	ENSRNOT00000023358	GO:0008270(zinc ion binding);GO:0016021(integral component of membrane)	NA	NA	NA	RING finger protein 186 [Rattus norvegicus]	1.04962	2.26701	37.9382	11.4305	0.067181	-3.8958	9.4974e-09	2.71399e-06	down	yes
ENSRNOG00000045840	Hist2h4a	ENSRNOT00000071512	GO:0000784(nuclear chromosome, telomeric region);GO:0000786(nucleosome);GO:0003677(DNA binding);GO:0005654(nucleoplasm);GO:0006335(DNA replication-dependent nucleosome assembly);GO:0006336(DNA replication-independent nucleosome assembly);GO:0006352(DNA-templated transcription, initiation);GO:0016020(membrane);GO:0019904(protein domain specific binding);GO:0042393(histone binding);GO:0044822(poly(…	05203(Viral carcinogenesis);05322(Systemic lupus erythematosus);05034(Alcoholism)	K11254	NA	histone 1, H4c [Homo sapiens]	34.9862	35.8758	3.7703	1.10924	14.5223	3.8602	2.62761e-08	7.33408e-06	up	yes
ENSRNOG00000007591	Slc45a3	ENSRNOT00000010242	GO:0008506(sucrose:proton symporter activity);GO:0010907(positive regulation of glucose metabolic process);GO:0015770(sucrose transport);GO:0016021(integral component of membrane);GO:0045723(positive regulation of fatty acid biosynthetic process);GO:0048713(regulation of oligodendrocyte differentiation);GO:0055085(transmembrane transport)	05202(Transcriptional misregulation in cancers);05206(MicroRNAs in cancer)	K15379	NA	PREDICTED: solute carrier family 45 member 3 isoform X1 [Rattus norvegicus]	9.57419	10.1401	1.64541	2.26071	5.04703	2.33544	4.83618e-08	1.31638e-05	up	yes
ENSRNOG00000000451	RT1-Ba	ENSRNOT00000000523;ENSRNOT00000077143;ENSRNOT00000091096	GO:0002504(antigen processing and presentation of peptide or polysaccharide antigen via MHC class II);GO:0005575(cellular_component);GO:0005764(lysosome);GO:0005886(plasma membrane);GO:0006955(immune response);GO:0009897(external side of plasma membrane);GO:0016020(membrane);GO:0016021(integral component of membrane);GO:0019882(antigen processing and presentation);GO:0019886(antigen processing an…	04514(Cell adhesion molecules (CAMs));04145(Phagosome);04612(Antigen processing and presentation);04672(Intestinal immune network for IgA production);05310(Asthma);05322(Systemic lupus erythematosus);05323(Rheumatoid arthritis);05320(Autoimmune thyroid disease);05321(Inflammatiory bowel disease (IBD));05330(Allograft rejection);05332(Graft-versus-host disease);05416(Viral myocarditis);04940(Type …	K06752	NA	rano class II histocompatibility antigen, B alpha chain precursor [Rattus norvegicus]	2.61044	3.07487	17.9736	15.183	0.171468	-2.54398	4.93559e-08	1.31638e-05	down	yes
ENSRNOG00000013552	Scd	ENSRNOT00000018447	GO:0004768(stearoyl-CoA 9-desaturase activity);GO:0005506(iron ion binding);GO:0005783(endoplasmic reticulum);GO:0005789(endoplasmic reticulum membrane);GO:0006633(fatty acid biosynthetic process);GO:0006636(unsaturated fatty acid biosynthetic process);GO:0006641(triglyceride metabolic process);GO:0008610(lipid biosynthetic process);GO:0016020(membrane);GO:0016021(integral component of membrane);…	01212(Fatty acid metabolism);01040(Biosynthesis of unsaturated fatty acids);04152(AMPK signaling pathway);03320(PPAR signaling pathway)	K00507	EC:1.14.19.1	acyl-CoA desaturase 1 [Rattus norvegicus]	4.17577	7.51232	27.0585	68.4924	0.122323	-3.03123	1.01668e-07	2.65264e-05	down	yes
ENSRNOG00000049289	Robo4	ENSRNOT00000043344	GO:0001525(angiogenesis);GO:0004872(receptor activity);GO:0009897(external side of plasma membrane);GO:0030154(cell differentiation);GO:0030336(negative regulation of cell migration);GO:0042981(regulation of apoptotic process);GO:0070062(extracellular exosome)	04360(Axon guidance)	K06755	NA	roundabout homolog 4 (Drosophila), isoform CRA_b [Rattus norvegicus]	0	0.029517	0.685886	0.889074	0.0187414	-5.73763	1.21408e-07	3.10029e-05	down	yes
ENSRNOG00000001242	Gstt3	ENSRNOT00000036518	GO:0004364(glutathione transferase activity);GO:0006749(glutathione metabolic process)	00480(Glutathione metabolism);00980(Metabolism of xenobiotics by cytochrome P450);00982(Drug metabolism - cytochrome P450);05204(Chemical carcinogenesis)	K00799	EC:2.5.1.18	glutathione S-transferase, theta 3 [Rattus norvegicus]	16.4241	24.3263	169.757	89.2625	0.157325	-2.66818	1.38535e-07	3.46396e-05	down	yes
ENSRNOG00000061691	LOC102550455	ENSRNOT00000086613	GO:0005521(lamin binding);GO:0005638(lamin filament);GO:0031981(nuclear lumen)	NA	NA	NA	PREDICTED: nuclear prelamin A recognition factor-like [Rattus norvegicus]	0	0.02704	0.592617	1.2067	0.0150279	-6.05621	2.18234e-07	5.3454e-05	down	yes
ENSRNOG00000042838	Junb	ENSRNOT00000067780	GO:0000122(negative regulation of transcription from RNA polymerase II promoter);GO:0000790(nuclear chromatin);GO:0000977(RNA polymerase II regulatory region sequence-specific DNA binding);GO:0000978(RNA polymerase II core promoter proximal region sequence-specific DNA binding);GO:0001077(transcriptional activator activity, RNA polymerase II core promoter proximal region sequence-specific binding…	04668(TNF signaling pathway);04380(Osteoclast differentiation)	K09028	NA	transcription factor jun-B [Rattus norvegicus]	259.481	199.625	51.178	45.5357	4.74706	2.24704	2.44718e-07	5.87421e-05	up	yes
ENSRNOG00000013973	Lcn2	ENSRNOT00000018776	GO:0002020(protease binding);GO:0005215(transporter activity);GO:0005506(iron ion binding);GO:0005576(extracellular region);GO:0005615(extracellular space);GO:0005829(cytosol);GO:0006811(ion transport);GO:0006979(response to oxidative stress);GO:0009615(response to virus);GO:0009617(response to bacterium);GO:0009635(response to herbicide);GO:0010046(response to mycotoxin);GO:0010628(positive regu…	00590(Arachidonic acid metabolism)	K01830	EC:5.3.99.2	RecName: Full=Neutrophil gelatinase-associated lipocalin; Short=NGAL; AltName: Full=Alpha-2-microglobulin-related protein; AltName: Full=Alpha-2U globulin-related protein; AltName: Full=Lipocalin-2; AltName: Full=Siderocalin LCN2; AltName: Full=p25; Flags: Precursor	282.786	24.9006	8.3078	6.33234	21.0166	4.39346	3.09399e-07	7.2812e-05	up	yes
ENSRNOG00000046779	RGD1309808	ENSRNOT00000091911;ENSRNOT00000074245	GO:0005576(extracellular region);GO:0006869(lipid transport);GO:0008289(lipid binding);GO:0042157(lipoprotein metabolic process);GO:0042157(lipoprotein metabolic process)	05143(African trypanosomiasis);05143(African trypanosomiasis)	K14480	NA	apolipoprotein L3 [Rattus norvegicus]	0	0.011748	0.349565	0.433188	0.0150086	-6.05807	3.48807e-07	8.05073e-05	down	yes
ENSRNOG00000019716	Ntf3	ENSRNOT00000087115;ENSRNOT00000082009;ENSRNOT00000026685	GO:0000186(activation of MAPKK activity);GO:0000187(activation of MAPK activity);GO:0002092(positive regulation of receptor internalization);GO:0005165(neurotrophin receptor binding);GO:0005166(neurotrophin p75 receptor binding);GO:0005576(extracellular region);GO:0007169(transmembrane receptor protein tyrosine kinase signaling pathway);GO:0007202(activation of phospholipase C activity);GO:000726…	04010(MAPK signaling pathway);04722(Neurotrophin signaling pathway);04722(Neurotrophin signaling pathway)	K04356	NA	neurotrophin-3 isoform 2 [Rattus norvegicus]	10.9081	13.0659	2.4957	1.89205	5.46385	2.44992	4.98529e-07	0.000112893	up	yes
ENSRNOG00000049537	AABR07021544.1	ENSRNOT00000076888;ENSRNOT00000076385	GO:0016021(integral component of membrane);GO:0016021(integral component of membrane)	NA	NA	NA	rCG46225, isoform CRA_a [Rattus norvegicus]	0.244984	0.241959	2.01222	1.7084	0.130877	-2.93372	8.73784e-07	0.000194207	down	yes
ENSRNOG00000010725	Cpa1	ENSRNOT00000014465	GO:0004181(metallocarboxypeptidase activity);GO:0005615(extracellular space);GO:0006508(proteolysis);GO:0008238(exopeptidase activity);GO:0008270(zinc ion binding);GO:0051603(proteolysis involved in cellular protein catabolic process)	04972(Pancreatic secretion);04974(Protein digestion and absorption)	K08779	EC:3.4.17.1	carboxypeptidase A1 preproprotein [Rattus norvegicus]	220.32	255.698	55.4687	54.8005	4.31687	2.10998	9.09072e-07	0.000198376	up	yes
ENSRNOG00000030332	Ighg1	ENSRNOT00000006975	GO:0003823(antigen binding);GO:0005615(extracellular space);GO:0006910(phagocytosis, recognition);GO:0006911(phagocytosis, engulfment);GO:0006958(complement activation, classical pathway);GO:0009897(external side of plasma membrane);GO:0034987(immunoglobulin receptor binding);GO:0042571(immunoglobulin complex, circulating);GO:0042742(defense response to bacterium);GO:0045087(innate immune respons…	04064(NF-kappa B signaling pathway);04020(Calcium signaling pathway);04072(Phospholipase D signaling pathway);04151(PI3K-Akt signaling pathway);04145(Phagosome);04640(Hematopoietic cell lineage);04650(Natural killer cell mediated cytotoxicity);04662(B cell receptor signaling pathway);04664(Fc epsilon RI signaling pathway);04666(Fc gamma R-mediated phagocytosis);04672(Intestinal immune network for…	K06856	NA	RecName: Full=Ig gamma-1 chain C region	36.9832	4.34661	0.411295	0	100.487	6.65086	9.88785e-07	0.000210011	up	yes
ENSRNOG00000000503	Ppard	ENSRNOT00000083109;ENSRNOT00000042539	GO:0000122(negative regulation of transcription from RNA polymerase II promoter);GO:0000790(nuclear chromatin);GO:0001227(transcriptional repressor activity, RNA polymerase II transcription regulatory region sequence-specific binding);GO:0001890(placenta development);GO:0003677(DNA binding);GO:0003700(transcription factor activity, sequence-specific DNA binding);GO:0003707(steroid hormone recepto…	04310(Wnt signaling pathway);03320(PPAR signaling pathway);05200(Pathways in cancer);05221(Acute myeloid leukemia);05221(Acute myeloid leukemia)	K04504	NA	peroxisome proliferator-activated receptor delta [Rattus norvegicus]	8.36795	16.0479	1.44465	2.98641	5.51015	2.46209	9.97385e-07	0.000210011	up	yes
ENSRNOG00000016945	Pla2g2a	ENSRNOT00000022827	GO:0004623(phospholipase A2 activity);GO:0005509(calcium ion binding);GO:0005543(phospholipid binding);GO:0005615(extracellular space);GO:0005739(mitochondrion);GO:0005783(endoplasmic reticulum);GO:0006644(phospholipid metabolic process);GO:0008285(negative regulation of cell proliferation);GO:0016020(membrane);GO:0016042(lipid catabolic process);GO:0030141(secretory granule);GO:0035019(somatic s…	00564(Glycerophospholipid metabolism);00566(Ether lipid metabolism);00590(Arachidonic acid metabolism);00591(Linoleic acid metabolism);00592(alpha-Linolenic acid metabolism);04014(Ras signaling pathway);04270(Vascular smooth muscle contraction);04972(Pancreatic secretion);04975(Fat digestion and absorption)	K01047	EC:3.1.1.4	phospholipase A2, membrane associated precursor [Rattus norvegicus]	30.9924	119.976	2.91117	10.5795	11.1906	3.48421	1.07812e-06	0.000223096	up	yes
ENSRNOG00000061299	LOC100134871	ENSRNOT00000090745	GO:0005344(oxygen transporter activity);GO:0005506(iron ion binding);GO:0005833(hemoglobin complex);GO:0015671(oxygen transport);GO:0019825(oxygen binding);GO:0020037(heme binding)	05144(Malaria);05143(African trypanosomiasis)	K13823	NA	hemoglobin subunit beta-2 [Rattus norvegicus]	30.0324	36.2611	216.114	117.788	0.198542	-2.33249	1.09942e-06	0.000223647	down	yes
ENSRNOG00000053739	RF00003	ENSRNOT00000089489	NA	04110(Cell cycle)	K06628	NA	PREDICTED: inactive serine/threonine-protein kinase TEX14 [Sus scrofa]	12.6185	8.51716	0.471811	0	44.7969	5.48533	1.1878e-06	0.000237599	up	yes
ENSRNOG00000029886	Hba-a2	ENSRNOT00000051483	GO:0001701(in utero embryonic development);GO:0003674(molecular_function);GO:0004601(peroxidase activity);GO:0005344(oxygen transporter activity);GO:0005506(iron ion binding);GO:0005515(protein binding);GO:0005833(hemoglobin complex);GO:0010942(positive regulation of cell death);GO:0015671(oxygen transport);GO:0016020(membrane);GO:0019825(oxygen binding);GO:0020037(heme binding);GO:0022627(cytoso…	05144(Malaria);05143(African trypanosomiasis)	K13822	NA	hemoglobin subunit alpha-1/2 [Rattus norvegicus]	242.212	193.765	1186.44	814.866	0.217847	-2.19861	1.35874e-06	0.000267337	down	yes
ENSRNOG00000011081	Serpina7	ENSRNOT00000014739;ENSRNOT00000093401	GO:0004867(serine-type endopeptidase inhibitor activity);GO:0005615(extracellular space);GO:0007568(aging);GO:0009791(post-embryonic development);GO:0010951(negative regulation of endopeptidase activity);GO:0015349(thyroid hormone transmembrane transporter activity);GO:0031667(response to nutrient levels);GO:0033189(response to vitamin A);GO:0034695(response to prostaglandin E);GO:0042493(respons…	04610(Complement and coagulation cascades);04610(Complement and coagulation cascades)	K03984	NA	PREDICTED: thyroxine-binding globulin isoform X1 [Rattus norvegicus]	37.274	27.2763	6.26546	1.3865	8.43578	3.07652	1.83241e-06	0.000354719	up	yes
ENSRNOG00000029744	Ces2j	ENSRNOT00000061734	GO:0005615(extracellular space);GO:0052689(carboxylic ester hydrolase activity)	00983(Drug metabolism - other enzymes)	K03927	EC:3.1.1.1;EC:3.1.1.84	carboxylesterase 2J precursor [Rattus norvegicus]	0.513811	0.688984	5.44352	3.78571	0.130324	-2.93982	1.9e-06	0.000361965	down	yes
ENSRNOG00000010463	Cpa4	ENSRNOT00000013880	GO:0004181(metallocarboxypeptidase activity);GO:0005615(extracellular space);GO:0006508(proteolysis);GO:0008270(zinc ion binding)	04972(Pancreatic secretion);04974(Protein digestion and absorption)	K01298	EC:3.4.17.15	carboxypeptidase A4 precursor [Rattus norvegicus]	11.6456	10.9048	1.1959	3.22182	5.10455	2.35178	2.28424e-06	0.000428366	up	yes
ENSRNOG00000047098	LOC689064	ENSRNOT00000019913;ENSRNOT00000089102;ENSRNOT00000087661	GO:0005344(oxygen transporter activity);GO:0005506(iron ion binding);GO:0005833(hemoglobin complex);GO:0015671(oxygen transport);GO:0019825(oxygen binding);GO:0020037(heme binding);GO:0020037(heme binding)	05144(Malaria);05143(African trypanosomiasis);05143(African trypanosomiasis)	K13823	NA	hemoglobin subunit beta-2 [Rattus norvegicus]	10.6469	11.8776	62.2179	35.5448	0.230399	-2.11779	3.98098e-06	0.000735073	down	yes
ENSRNOG00000058105	Hbb	ENSRNOT00000090422	GO:0004601(peroxidase activity);GO:0005344(oxygen transporter activity);GO:0005506(iron ion binding);GO:0005833(hemoglobin complex);GO:0006749(glutathione metabolic process);GO:0010942(positive regulation of cell death);GO:0010999(regulation of eIF2 alpha phosphorylation by heme);GO:0015671(oxygen transport);GO:0019825(oxygen binding);GO:0020037(heme binding);GO:0030097(hemopoiesis);GO:0030492(he…	05144(Malaria);05143(African trypanosomiasis)	K13823	NA	beta-globin [Rattus norvegicus]	100.575	46.0583	313.795	340.91	0.223968	-2.15863	4.32402e-06	0.000786317	down	yes
ENSRNOG00000047321	Hba-a2	ENSRNOT00000048977	GO:0005344(oxygen transporter activity);GO:0005506(iron ion binding);GO:0005833(hemoglobin complex);GO:0015671(oxygen transport);GO:0019825(oxygen binding);GO:0020037(heme binding)	05144(Malaria);05143(African trypanosomiasis)	K13822	NA	hemoglobin, alpha 2 [Rattus norvegicus]	140.758	111.251	617.776	427.63	0.241063	-2.05252	4.62906e-06	0.000829223	down	yes
ENSRNOG00000049829	AABR07060872.1	ENSRNOT00000074175;ENSRNOT00000031991;ENSRNOT00000086911;ENSRNOT00000042165	GO:0002377(immunoglobulin production);GO:0005615(extracellular space);GO:0006955(immune response);GO:0006955(immune response)	05340(Primary immunodeficiency);05340(Primary immunodeficiency)	K06554	NA	PREDICTED: tyrosine-protein phosphatase non-receptor type substrate 1-like isoform X2 [Rattus norvegicus]	472.126	106.391	45.3974	18.4303	9.06374	3.18011	4.70923e-06	0.000831178	up	yes
ENSRNOG00000047571	RGD1563231	ENSRNOT00000074382	GO:0002377(immunoglobulin production);GO:0005615(extracellular space);GO:0006955(immune response)	NA	NA	NA	PREDICTED: Ig kappa chain V-III region MOPC 63 [Rattus norvegicus]	18.5076	4.79379	0.85955	0.245362	21.0889	4.39841	4.8249e-06	0.00083239	up	yes
ENSRNOG00000046912	Nr1d2	ENSRNOT00000081845;ENSRNOT00000071751	GO:0001046(core promoter sequence-specific DNA binding);GO:0003677(DNA binding);GO:0003700(transcription factor activity, sequence-specific DNA binding);GO:0003707(steroid hormone receptor activity);GO:0004887(thyroid hormone receptor activity);GO:0005634(nucleus);GO:0006351(transcription, DNA-templated);GO:0006355(regulation of transcription, DNA-templated);GO:0008270(zinc ion binding);GO:001921…	04710(Circadian rhythm);04710(Circadian rhythm)	K03728	NA	Rev-ErbA-beta, partial [Rattus norvegicus]	2.90306	2.35891	8.08584	12.2604	0.258621	-1.95109	4.8548e-06	0.00083239	down	yes
ENSRNOG00000034093	AABR07011951.1	ENSRNOT00000047593	GO:0000151(ubiquitin ligase complex);GO:0001664(G-protein coupled receptor binding);GO:0005524(ATP binding);GO:0005814(centriole);GO:0005829(cytosol);GO:0005925(focal adhesion);GO:0016234(inclusion body);GO:0031072(heat shock protein binding);GO:0031397(negative regulation of protein ubiquitination);GO:0031625(ubiquitin protein ligase binding);GO:0032757(positive regulation of interleukin-8 produ…	03040(Spliceosome);04141(Protein processing in endoplasmic reticulum);04010(MAPK signaling pathway);04144(Endocytosis);04612(Antigen processing and presentation);04915(Estrogen signaling pathway);04213(Longevity regulating pathway - multiple species);05134(Legionellosis);05162(Measles);05164(Influenza A);05169(Epstein-Barr virus infection);05145(Toxoplasmosis)	K03283	NA	Heat shock cognate 71 kDa protein [Fukomys damarensis]	13.6376	6.73948	33.6287	58.4484	0.221304	-2.1759	5.75749e-06	0.000973259	down	yes
ENSRNOG00000007866	Clec2dl1	ENSRNOT00000087850;ENSRNOT00000047790	GO:0005886(plasma membrane);GO:0016021(integral component of membrane);GO:0030246(carbohydrate binding);GO:0030246(carbohydrate binding)	NA	NA	NA	C-type lectin domain family 2 member D6 [Rattus norvegicus]	0.0326785	0.0338323	0.486973	0.540911	0.0647066	-3.94994	6.4008e-06	0.00106698	down	yes
ENSRNOG00000014448	Arntl	ENSRNOT00000046313	GO:0000060(protein import into nucleus, translocation);GO:0000976(transcription regulatory region sequence-specific DNA binding);GO:0000982(transcription factor activity, RNA polymerase II core promoter proximal region sequence-specific binding);GO:0001046(core promoter sequence-specific DNA binding);GO:0001047(core promoter binding);GO:0001190(transcriptional activator activity, RNA polymerase I…	04728(Dopaminergic synapse);04710(Circadian rhythm);05168(Herpes simplex infection)	K02296	NA	aryl hydrocarbon receptor nuclear translocator-like protein 1 [Cricetulus griseus]	7.76865	7.76043	0.57899	2.07122	5.85956	2.55079	8.30348e-06	0.00135461	up	yes
ENSRNOG00000019050	Ifit1	ENSRNOT00000025770	GO:0003723(RNA binding);GO:0005737(cytoplasm);GO:0035457(cellular response to interferon-alpha);GO:0035458(cellular response to interferon-beta);GO:0050688(regulation of defense response to virus);GO:0051607(defense response to virus);GO:0071357(cellular response to type I interferon);GO:0071360(cellular response to exogenous dsRNA)	05160(Hepatitis C);05168(Herpes simplex infection)	K14217	NA	interferon-induced protein with tetratricopeptide repeats 1-like protein [Rattus norvegicus]	20.5491	2.66	0.969281	0.16891	20.3912	4.34988	8.35201e-06	0.00135461	up	yes
ENSRNOG00000036603	Ifit1bl	ENSRNOT00000076802	GO:0003723(RNA binding);GO:0005737(cytoplasm);GO:0009615(response to virus);GO:0035457(cellular response to interferon-alpha);GO:0035458(cellular response to interferon-beta);GO:0050688(regulation of defense response to virus);GO:0051607(defense response to virus);GO:0071357(cellular response to type I interferon);GO:0071360(cellular response to exogenous dsRNA)	05160(Hepatitis C);05168(Herpes simplex infection)	K14217	NA	PREDICTED: interferon-induced protein with tetratricopeptide repeats 1 isoform X1 [Rattus norvegicus]	2.20072	0.982438	0.108841	0.181352	10.9691	3.45538	8.69317e-06	0.00137752	up	yes
ENSRNOG00000050000	AABR07034739.1	ENSRNOT00000057971	GO:0003823(antigen binding)	05340(Primary immunodeficiency)	K06554	NA	immunoglobulin lambda light chain, partial [Rattus norvegicus]	123.722	27.8337	12.1933	7.46707	7.7087	2.94649	8.72285e-06	0.00137752	up	yes
ENSRNOG00000027024	Rgs16	ENSRNOT00000032236	GO:0005096(GTPase activator activity);GO:0005737(cytoplasm);GO:0005886(plasma membrane);GO:0007186(G-protein coupled receptor signaling pathway);GO:0009968(negative regulation of signal transduction);GO:0031224(intrinsic component of membrane);GO:0043547(positive regulation of GTPase activity);GO:0045121(membrane raft)	04360(Axon guidance)	K07524	NA	regulator of G-protein signaling 16 [Rattus norvegicus]	163.023	43.5526	15.7667	19.9201	5.78856	2.5332	8.98499e-06	0.00140049	up	yes
ENSRNOG00000019630	Hacl1	ENSRNOT00000026588	GO:0000287(magnesium ion binding);GO:0001561(fatty acid alpha-oxidation);GO:0005102(receptor binding);GO:0005777(peroxisome);GO:0006629(lipid metabolic process);GO:0016829(lyase activity);GO:0016830(carbon-carbon lyase activity);GO:0030976(thiamine pyrophosphate binding);GO:0042802(identical protein binding);GO:0048037(cofactor binding);GO:0051259(protein oligomerization)	04146(Peroxisome)	K12261	EC:4.1.-.-	2-hydroxyacyl-CoA lyase 1 [Rattus norvegicus]	10.8463	9.28612	25.4996	102.817	0.156896	-2.67212	9.13911e-06	0.00140625	down	yes
ENSRNOG00000009488	Cyp7a1	ENSRNOT00000012819	GO:0005506(iron ion binding);GO:0005789(endoplasmic reticulum membrane);GO:0006699(bile acid biosynthetic process);GO:0006707(cholesterol catabolic process);GO:0008123(cholesterol 7-alpha-monooxygenase activity);GO:0020037(heme binding);GO:0042632(cholesterol homeostasis);GO:0043231(intracellular membrane-bounded organelle);GO:0055114(oxidation-reduction process);GO:0070857(regulation of bile aci…	00120(Primary bile acid biosynthesis);00140(Steroid hormone biosynthesis);03320(PPAR signaling pathway);04976(Bile secretion)	K00489	EC:1.14.14.23	cholesterol 7-alpha-monooxygenase [Rattus norvegicus]	8.90915	17.6164	50.6741	71.7453	0.216678	-2.20638	1.00802e-05	0.00153143	down	yes
ENSRNOG00000047367	Card14	ENSRNOT00000070842	GO:0001934(positive regulation of protein phosphorylation);GO:0005737(cytoplasm);GO:0033209(tumor necrosis factor-mediated signaling pathway);GO:0043066(negative regulation of apoptotic process);GO:0050700(CARD domain binding);GO:0051092(positive regulation of NF-kappaB transcription factor activity)	04064(NF-kappa B signaling pathway);04660(T cell receptor signaling pathway);04662(B cell receptor signaling pathway)	K07367	NA	PREDICTED: LOW QUALITY PROTEIN: caspase recruitment domain-containing protein 14 isoform X1 [Rattus norvegicus]	1.4824	1.90291	0.152087	0.292363	7.61686	2.9292	1.02453e-05	0.00153706	up	yes
ENSRNOG00000022698	Vsig10	ENSRNOT00000079177;ENSRNOT00000038293	GO:0016021(integral component of membrane);GO:0016021(integral component of membrane)	NA	NA	NA	PREDICTED: V-set and immunoglobulin domain-containing protein 10 isoform X1 [Rattus norvegicus]	2.0913	4.53987	0.615008	0.460568	6.16523	2.62416	1.19079e-05	0.00176224	up	yes
ENSRNOG00000042717	Ciart	ENSRNOT00000056322;ENSRNOT00000085632	GO:0001046(core promoter sequence-specific DNA binding);GO:0005634(nucleus);GO:0032922(circadian regulation of gene expression);GO:0045475(locomotor rhythm);GO:0045892(negative regulation of transcription, DNA-templated);GO:0070888(E-box binding);GO:0070888(E-box binding)	NA	NA	NA	circadian-associated transcriptional repressor [Rattus norvegicus]	0.185058	0.250334	2.47045	1.75461	0.10305	-3.27858	1.20399e-05	0.00176224	down	yes
ENSRNOG00000001469	Eln	ENSRNOT00000032780;ENSRNOT00000040069	GO:0001974(blood vessel remodeling);GO:0005201(extracellular matrix structural constituent);GO:0005576(extracellular region);GO:0005578(proteinaceous extracellular matrix);GO:0005615(extracellular space);GO:0005739(mitochondrion);GO:0007519(skeletal muscle tissue development);GO:0007568(aging);GO:0030023(extracellular matrix constituent conferring elasticity);GO:0030198(extracellular matrix organ…	04974(Protein digestion and absorption);04974(Protein digestion and absorption)	K14211	NA	PREDICTED: uncharacterized protein LOC102736304 [Leptonychotes weddellii]	0.911938	1.45244	3.56713	9.74361	0.17763	-2.49306	1.44137e-05	0.00208426	down	yes
ENSRNOG00000017914	Cavin3	ENSRNOT00000024119	GO:0001558(regulation of cell growth);GO:0005080(protein kinase C binding);GO:0005737(cytoplasm);GO:0005901(caveola);GO:0030866(cortical actin cytoskeleton organization);GO:0032922(circadian regulation of gene expression);GO:0043234(protein complex);GO:0051898(negative regulation of protein kinase B signaling);GO:0070374(positive regulation of ERK1 and ERK2 cascade);GO:1901003(negative regulation…	NA	NA	NA	protein kinase C delta-binding protein [Rattus norvegicus]	44.1344	48.1843	175.541	155.743	0.278669	-1.84337	1.60652e-05	0.00229541	down	yes
ENSRNOG00000013408	Npas2	ENSRNOT00000059571	GO:0003677(DNA binding);GO:0003700(transcription factor activity, sequence-specific DNA binding);GO:0005634(nucleus);GO:0005667(transcription factor complex);GO:0005737(cytoplasm);GO:0006351(transcription, DNA-templated);GO:0032922(circadian regulation of gene expression);GO:0042745(circadian sleep/wake cycle);GO:0042752(regulation of circadian rhythm);GO:0045475(locomotor rhythm);GO:0045739(posi…	04710(Circadian rhythm)	K09026	NA	neuronal PAS domain-containing protein 2 [Rattus norvegicus]	8.08518	13.2258	1.51426	3.43395	4.30681	2.10662	1.62571e-05	0.00229551	up	yes
ENSRNOG00000008234	Lrrc61	ENSRNOT00000010864	GO:0003674(molecular_function);GO:0005575(cellular_component);GO:0008150(biological_process)	NA	NA	NA	leucine-rich repeat-containing protein 61 [Rattus norvegicus]	11.4659	13.4896	3.96079	3.27145	3.45059	1.78684	1.69363e-05	0.0023636	up	yes
ENSRNOG00000045991	LOC100911558	ENSRNOT00000075695	GO:0001669(acrosomal vesicle);GO:0004867(serine-type endopeptidase inhibitor activity);GO:0005615(extracellular space);GO:0060046(regulation of acrosome reaction);GO:1900004(negative regulation of serine-type endopeptidase activity)	NA	NA	NA	PREDICTED: serine protease inhibitor Kazal-type 1-like [Rattus norvegicus]	34.6827	16.6054	3.87599	5.28674	5.59746	2.48477	1.73771e-05	0.00239724	up	yes
ENSRNOG00000015577	Lpar6	ENSRNOT00000021430	GO:0004930(G-protein coupled receptor activity);GO:0005886(plasma membrane);GO:0007186(G-protein coupled receptor signaling pathway);GO:0016021(integral component of membrane)	04072(Phospholipase D signaling pathway);04151(PI3K-Akt signaling pathway);04080(Neuroactive ligand-receptor interaction);05200(Pathways in cancer)	K04273	NA	lysophosphatidic acid receptor 6 [Rattus norvegicus]	33.013	36.9047	10.9208	9.79444	3.37518	1.75496	1.77252e-05	0.00241747	up	yes
ENSRNOG00000062027	AABR07035343.1	ENSRNOT00000071669	GO:0004497(monooxygenase activity);GO:0005496(steroid binding);GO:0005506(iron ion binding);GO:0005737(cytoplasm);GO:0005789(endoplasmic reticulum membrane);GO:0006706(steroid catabolic process);GO:0008202(steroid metabolic process);GO:0008395(steroid hydroxylase activity);GO:0009822(alkaloid catabolic process);GO:0016098(monoterpenoid metabolic process);GO:0016491(oxidoreductase activity);GO:001…	00140(Steroid hormone biosynthesis);00591(Linoleic acid metabolism);00830(Retinol metabolism);05204(Chemical carcinogenesis)	K07424	EC:1.14.14.1	PREDICTED: cytochrome P450 3A2-like isoform X6 [Rattus norvegicus]	41.5999	46.967	11.1991	15.3523	3.33568	1.73798	2.24758e-05	0.00303095	up	yes
ENSRNOG00000032401	H3f3c	ENSRNOT00000049001	GO:0000786(nucleosome);GO:0003677(DNA binding);GO:0005634(nucleus);GO:0046982(protein heterodimerization activity)	05202(Transcriptional misregulation in cancers);05322(Systemic lupus erythematosus);05034(Alcoholism)	K11253	NA	PREDICTED: histone H3.3-like [Trichogramma pretiosum]	1.86291	1.68623	9.4549	8.21297	0.200881	-2.31559	2.37446e-05	0.00313927	down	yes
ENSRNOG00000008095	Onecut1	ENSRNOT00000032280	GO:0001077(transcriptional activator activity, RNA polymerase II core promoter proximal region sequence-specific binding);GO:0001228(transcriptional activator activity, RNA polymerase II transcription regulatory region sequence-specific binding);GO:0001889(liver development);GO:0001952(regulation of cell-matrix adhesion);GO:0002064(epithelial cell development);GO:0003677(DNA binding);GO:0003700(t…	04550(Signaling pathways regulating pluripotency of stem cells);04950(Maturity onset diabetes of the young)	K08026	NA	one cut domain, family member 1, isoform CRA_b [Rattus norvegicus]	2.75785	2.70241	8.54732	11.589	0.271165	-1.88276	2.38021e-05	0.00313927	down	yes
ENSRNOG00000058301	RF00100	ENSRNOT00000082519	GO:0070062(extracellular exosome)	NA	NA	NA	Nuclear prelamin A recognition factor [Myotis davidii]	5.69249	5.3428	0.43038	0	25.6408	4.68037	2.41823e-05	0.00315473	up	yes
ENSRNOG00000001442	Por	ENSRNOT00000001961	GO:0003420(regulation of growth plate cartilage chondrocyte proliferation);GO:0003958(NADPH-hemoprotein reductase activity);GO:0004128(cytochrome-b5 reductase activity, acting on NAD(P)H);GO:0005739(mitochondrion);GO:0005789(endoplasmic reticulum membrane);GO:0007584(response to nutrient);GO:0008941(nitric oxide dioxygenase activity);GO:0009055(electron carrier activity);GO:0009437(carnitine meta…	00220(Arginine biosynthesis);00330(Arginine and proline metabolism);04145(Phagosome)	K13240	EC:1.14.13.39	NADPH--cytochrome P450 reductase [Rattus norvegicus]	33.181	25.2208	80.8305	139.202	0.265423	-1.91363	2.48299e-05	0.00320356	down	yes
ENSRNOG00000008445	Dact1	ENSRNOT00000011466	GO:0000122(negative regulation of transcription from RNA polymerase II promoter);GO:0001085(RNA polymerase II transcription factor binding);GO:0001702(gastrulation with mouth forming second);GO:0005080(protein kinase C binding);GO:0005634(nucleus);GO:0005654(nucleoplasm);GO:0005737(cytoplasm);GO:0008013(beta-catenin binding);GO:0021915(neural tube development);GO:0030177(positive regulation of Wn…	NA	NA	NA	PREDICTED: dapper homolog 1 isoform X1 [Rattus norvegicus]	0.151104	0.198284	2.65127	0.938156	0.0973382	-3.36085	2.50903e-05	0.00320356	down	yes
ENSRNOG00000002802	Cxcl1	ENSRNOT00000003778	GO:0001975(response to amphetamine);GO:0002526(acute inflammatory response);GO:0005615(extracellular space);GO:0005623(cell);GO:0006955(immune response);GO:0007186(G-protein coupled receptor signaling pathway);GO:0007204(positive regulation of cytosolic calcium ion concentration);GO:0008009(chemokine activity);GO:0008083(growth factor activity);GO:0009408(response to heat);GO:0010332(response to …	04668(TNF signaling pathway);04060(Cytokine-cytokine receptor interaction);04621(NOD-like receptor signaling pathway);04062(Chemokine signaling pathway);05132(Salmonella infection);05134(Legionellosis)	K05505	NA	chemokine (C-X-C motif) ligand 1 [Rattus norvegicus]	110.574	43.4889	4.71941	19.589	6.33785	2.66399	2.59351e-05	0.00327656	up	yes
ENSRNOG00000059910	AABR07051689.1	ENSRNOT00000086557	GO:0002377(immunoglobulin production);GO:0005615(extracellular space);GO:0006955(immune response)	NA	NA	NA	rCG64263, partial [Rattus norvegicus]	10.9941	3.87583	0.307063	0.774213	13.7522	3.78159	2.88101e-05	0.00360186	up	yes
ENSRNOG00000003198	RGD1305733	ENSRNOT00000004346	GO:0007026(negative regulation of microtubule depolymerization);GO:0015630(microtubule cytoskeleton);GO:0021822(negative regulation of cell motility involved in cerebral cortex radial glia guided migration)	NA	NA	NA	RIKEN cDNA 2900011O08, isoform CRA_a, partial [Mus musculus]	0.141695	0.263866	0.953639	4.21865	0.0784104	-3.67281	2.99109e-05	0.00367518	down	yes
ENSRNOG00000032246	Acsm3	ENSRNOT00000020039	GO:0003674(molecular_function);GO:0005524(ATP binding);GO:0005575(cellular_component);GO:0005739(mitochondrion);GO:0005759(mitochondrial matrix);GO:0006633(fatty acid biosynthetic process);GO:0008150(biological_process);GO:0015645(fatty acid ligase activity);GO:0046872(metal ion binding);GO:0047760(butyrate-CoA ligase activity)	00650(Butanoate metabolism)	K01896	EC:6.2.1.2	acyl-coenzyme A synthetase ACSM3, mitochondrial [Rattus norvegicus]	6.35358	5.27699	1.6786	0.997547	4.34601	2.11969	3.00089e-05	0.00367518	up	yes
ENSRNOG00000003606	AABR07014550.1	ENSRNOT00000004798	GO:0004364(glutathione transferase activity);GO:0004602(glutathione peroxidase activity);GO:0005575(cellular_component);GO:0005635(nuclear envelope);GO:0005783(endoplasmic reticulum);GO:0010243(response to organonitrogen compound);GO:0016020(membrane);GO:0016021(integral component of membrane);GO:0070062(extracellular exosome)	00480(Glutathione metabolism);00980(Metabolism of xenobiotics by cytochrome P450);00982(Drug metabolism - cytochrome P450);05204(Chemical carcinogenesis)	K00799	EC:2.5.1.18	microsomal glutathione S-transferase 3 [Rattus norvegicus]	0.175161	0.483195	4.27878	4.11949	0.0783919	-3.67315	3.07796e-05	0.00373148	down	yes
ENSRNOG00000024425	LOC100910636	ENSRNOT00000032838	GO:0008270(zinc ion binding)	05168(Herpes simplex infection)	K15411	NA	PREDICTED: zinc finger CW-type PWWP domain protein 1-like isoform X3 [Rattus norvegicus]	0.184215	0.270425	1.20387	2.00196	0.141817	-2.8179	3.40771e-05	0.00408994	down	yes
ENSRNOG00000023896	Dusp6	ENSRNOT00000037844	GO:0000188(inactivation of MAPK activity);GO:0001933(negative regulation of protein phosphorylation);GO:0004721(phosphoprotein phosphatase activity);GO:0004725(protein tyrosine phosphatase activity);GO:0005737(cytoplasm);GO:0005829(cytosol);GO:0006470(protein dephosphorylation);GO:0008138(protein tyrosine/serine/threonine phosphatase activity);GO:0009953(dorsal/ventral pattern formation);GO:00100…	04010(MAPK signaling pathway);05202(Transcriptional misregulation in cancers)	K04459	EC:3.1.3.16;EC:3.1.3.48	dual specificity protein phosphatase 6 [Rattus norvegicus]	19.9932	21.2438	7.16402	3.35072	3.92183	1.97153	3.62435e-05	0.00430687	up	yes
ENSRNOG00000001926	Cldn1	ENSRNOT00000002640	GO:0005198(structural molecule activity);GO:0005886(plasma membrane);GO:0005887(integral component of plasma membrane);GO:0005923(bicellular tight junction);GO:0016324(apical plasma membrane);GO:0016328(lateral plasma membrane);GO:0016338(calcium-independent cell-cell adhesion via plasma membrane cell-adhesion molecules);GO:0030054(cell junction);GO:0042802(identical protein binding);GO:0045216(c…	04514(Cell adhesion molecules (CAMs));04530(Tight junction);04670(Leukocyte transendothelial migration);05160(Hepatitis C)	K06087	NA	RecName: Full=Claudin-1	12.415	11.4354	3.35538	4.16791	3.1702	1.66457	3.81186e-05	0.00448529	up	yes
ENSRNOG00000003094	Cmahp	ENSRNOT00000018699;ENSRNOT00000081105	GO:0005634(nucleus);GO:0005737(cytoplasm);GO:0005856(cytoskeleton);GO:0016020(membrane);GO:0030111(regulation of Wnt signaling pathway);GO:0030338(CMP-N-acetylneuraminate monooxygenase activity);GO:0046381(CMP-N-acetylneuraminate metabolic process);GO:0051537(2 iron, 2 sulfur cluster binding);GO:0055114(oxidation-reduction process);GO:0055114(oxidation-reduction process)	00520(Amino sugar and nucleotide sugar metabolism);00520(Amino sugar and nucleotide sugar metabolism)	K08080	EC:1.14.18.2	cytidine monophospho-N-acetylneuraminic acid hydroxylase [Rattus norvegicus]	0.533607	1.14766	0.0660901	0	25.439	4.66897	3.92957e-05	0.00457891	up	yes
ENSRNOG00000019383	Tef	ENSRNOT00000026258;ENSRNOT00000086355	GO:0000978(RNA polymerase II core promoter proximal region sequence-specific DNA binding);GO:0001077(transcriptional activator activity, RNA polymerase II core promoter proximal region sequence-specific binding);GO:0003690(double-stranded DNA binding);GO:0003700(transcription factor activity, sequence-specific DNA binding);GO:0005634(nucleus);GO:0006366(transcription from RNA polymerase II promot…	04711(Circadian rhythm - fly);04711(Circadian rhythm - fly)	K09057	NA	thyrotroph embryonic factor [Rattus norvegicus]	2.5384	3.22561	9.60954	9.88874	0.295617	-1.7582	4.03239e-05	0.00465353	down	yes
ENSRNOG00000012404	Thrsp	ENSRNOT00000016540	GO:0005634(nucleus);GO:0005654(nucleoplasm);GO:0005829(cytosol);GO:0006351(transcription, DNA-templated);GO:0006355(regulation of transcription, DNA-templated);GO:0006629(lipid metabolic process);GO:0010866(regulation of triglyceride biosynthetic process);GO:0042803(protein homodimerization activity);GO:0046890(regulation of lipid biosynthetic process)	NA	NA	NA	thyroid hormone-inducible hepatic protein [Rattus norvegicus]	253.754	342.479	1114.39	1069.98	0.272954	-1.87327	4.08021e-05	0.00466387	down	yes
ENSRNOG00000001979	Rcan1	ENSRNOT00000002715	GO:0000166(nucleotide binding);GO:0002931(response to ischemia);GO:0005634(nucleus);GO:0005737(cytoplasm);GO:0006979(response to oxidative stress);GO:0007165(signal transduction);GO:0007519(skeletal muscle tissue development);GO:0007614(short-term memory);GO:0008597(calcium-dependent protein serine/threonine phosphatase regulator activity);GO:0009612(response to mechanical stimulus);GO:0030346(pr…	04921(Oxytocin signaling pathway);04919(Thyroid hormone signaling pathway)	K17901	NA	calcipressin-1 [Rattus norvegicus]	35.9246	25.0869	96.6023	107.127	0.299473	-1.7395	4.34582e-05	0.00492062	down	yes
ENSRNOG00000016807	Oat	ENSRNOT00000022628	GO:0003992(N2-acetyl-L-ornithine:2-oxoglutarate 5-aminotransferase activity);GO:0004587(ornithine-oxo-acid transaminase activity);GO:0005737(cytoplasm);GO:0005739(mitochondrion);GO:0005759(mitochondrial matrix);GO:0006591(ornithine metabolic process);GO:0010121(arginine catabolic process to proline via ornithine);GO:0019544(arginine catabolic process to glutamate);GO:0030170(pyridoxal phosphate b…	00330(Arginine and proline metabolism)	K00819	EC:2.6.1.13	ornithine aminotransferase, mitochondrial precursor [Rattus norvegicus]	24.1999	31.1374	110.53	84.4306	0.283838	-1.81686	4.4636e-05	0.00500674	down	yes
ENSRNOG00000014761	Rasd2	ENSRNOT00000020017	GO:0000166(nucleotide binding);GO:0001963(synaptic transmission, dopaminergic);GO:0005525(GTP binding);GO:0005886(plasma membrane);GO:0007165(signal transduction);GO:0007264(small GTPase mediated signal transduction);GO:0007610(behavior);GO:0007626(locomotory behavior);GO:0016020(membrane);GO:0031397(negative regulation of protein ubiquitination);GO:0031624(ubiquitin conjugating enzyme binding);G…	04713(Circadian entrainment)	K07843	NA	GTP-binding protein Rhes-like protein [Cricetulus griseus]	0.153649	0.812006	6.20791	2.75798	0.107703	-3.21487	4.51895e-05	0.00502189	down	yes
ENSRNOG00000021242	Adam33	ENSRNOT00000051404;ENSRNOT00000028854	GO:0003674(molecular_function);GO:0004222(metalloendopeptidase activity);GO:0005575(cellular_component);GO:0006508(proteolysis);GO:0008150(biological_process);GO:0008270(zinc ion binding);GO:0008270(zinc ion binding)	05010(Alzheimer's disease);05010(Alzheimer's disease)	K06704	EC:3.4.24.81	a disintegrin and metallopeptidase domain 33 (predicted), isoform CRA_b [Rattus norvegicus]	0.698161	1.42883	0.130344	0.061277	11.0999	3.47248	4.62916e-05	0.00506231	up	yes
ENSRNOG00000011483	S100a9	ENSRNOT00000015351	GO:0002523(leukocyte migration involved in inflammatory response);GO:0002544(chronic inflammatory response);GO:0002793(positive regulation of peptide secretion);GO:0003674(molecular_function);GO:0005509(calcium ion binding);GO:0005615(extracellular space);GO:0005634(nucleus);GO:0005737(cytoplasm);GO:0005856(cytoskeleton);GO:0005886(plasma membrane);GO:0006417(regulation of translation);GO:0006914…	NA	NA	NA	PREDICTED: protein S100-A9 isoform X1 [Rattus norvegicus]	69.1722	19.5799	3.73889	10.4431	6.25806	2.64572	4.63968e-05	0.00506231	up	yes
ENSRNOG00000013729	RGD1306271	ENSRNOT00000040391	GO:0016021(integral component of membrane)	NA	NA	NA	PREDICTED: UPF0606 protein KIAA1549 homolog isoform X1 [Rattus norvegicus]	0.177362	0.650442	0.023881	0.048462	11.4428	3.51636	4.69426e-05	0.00507572	up	yes
ENSRNOG00000014215	Klf9	ENSRNOT00000019367	GO:0000977(RNA polymerase II regulatory region sequence-specific DNA binding);GO:0001228(transcriptional activator activity, RNA polymerase II transcription regulatory region sequence-specific binding);GO:0003676(nucleic acid binding);GO:0003677(DNA binding);GO:0005634(nucleus);GO:0005654(nucleoplasm);GO:0005737(cytoplasm);GO:0005886(plasma membrane);GO:0006351(transcription, DNA-templated);GO:00…	NA	NA	NA	Krueppel-like factor 9 [Rattus norvegicus]	2.13555	1.76762	5.61873	9.29245	0.261762	-1.93368	5.4138e-05	0.00580146	down	yes
ENSRNOG00000010617	Scube1	ENSRNOT00000017727	GO:0005509(calcium ion binding);GO:0005615(extracellular space);GO:0009897(external side of plasma membrane);GO:0009986(cell surface);GO:0019897(extrinsic component of plasma membrane);GO:0042802(identical protein binding);GO:0046982(protein heterodimerization activity);GO:0051260(protein homooligomerization)	04977(Vitamin digestion and absorption)	K14616	NA	signal peptide, CUB and EGF-like domain-containing protein 1 precursor [Rattus norvegicus]	6.86379	1.51907	0.434677	0.030034	18.0389	4.17304	6.06029e-05	0.00643678	up	yes
ENSRNOG00000010410	Serpina3c	ENSRNOT00000013896	GO:0005615(extracellular space)	04610(Complement and coagulation cascades)	K03984	NA	serine protease inhibitor A3K precursor [Rattus norvegicus]	745.897	562.401	3406.6	1671.95	0.257612	-1.95673	6.34002e-05	0.00667481	down	yes
ENSRNOG00000001963	Mx2	ENSRNOT00000002695;ENSRNOT00000083067;ENSRNOT00000087603	GO:0003924(GTPase activity);GO:0005525(GTP binding);GO:0005737(cytoplasm);GO:0005737(cytoplasm)	05162(Measles);05164(Influenza A);05164(Influenza A)	K14754	NA	interferon-induced GTP-binding protein Mx2 [Rattus norvegicus]	112.131	7.13705	4.66216	5.55524	11.673	3.5451	6.4239e-05	0.00670432	up	yes
ENSRNOG00000015461	Serpine2	ENSRNOT00000020919;ENSRNOT00000077331	GO:0004867(serine-type endopeptidase inhibitor activity);GO:0005102(receptor binding);GO:0005539(glycosaminoglycan binding);GO:0005576(extracellular region);GO:0005615(extracellular space);GO:0005829(cytosol);GO:0007566(embryo implantation);GO:0007596(blood coagulation);GO:0008201(heparin binding);GO:0008285(negative regulation of cell proliferation);GO:0009314(response to radiation);GO:0009611(r…	04115(p53 signaling pathway);04933(AGE-RAGE signaling pathway in diabetic complications);04933(AGE-RAGE signaling pathway in diabetic complications)	K03982	NA	glia-derived nexin precursor [Rattus norvegicus]	1.90838	1.47736	8.41395	5.26642	0.247489	-2.01456	6.90277e-05	0.00714199	down	yes
ENSRNOG00000054467	LOC100910854	ENSRNOT00000083218	GO:0005515(protein binding);GO:0005737(cytoplasm);GO:0005886(plasma membrane);GO:0045202(synapse);GO:0046872(metal ion binding)	NA	NA	NA	PREDICTED: zinc finger MYND domain-containing protein 19-like [Rattus norvegicus]	0.090857	0.075479	0.615485	0.679471	0.128449	-2.96073	8.39585e-05	0.00861256	down	yes
ENSRNOG00000007947	Fam13a	ENSRNOT00000010898	GO:0003674(molecular_function);GO:0005575(cellular_component);GO:0008150(biological_process)	NA	NA	NA	protein FAM13A [Rattus norvegicus]	6.26163	5.4915	2.02721	1.07384	3.79004	1.92221	8.54307e-05	0.00868932	up	yes
ENSRNOG00000027811	Lilrb4	ENSRNOT00000077186;ENSRNOT00000038898	GO:0016021(integral component of membrane);GO:0016021(integral component of membrane)	04380(Osteoclast differentiation);04380(Osteoclast differentiation)	K06512	NA	leukocyte immunoglobulin like receptor B4 precursor [Rattus norvegicus]	7.64869	1.39979	0.279622	0.703273	9.20594	3.20257	9.14514e-05	0.00922352	up	yes
ENSRNOG00000016222	Ppp1r3g	ENSRNOT00000021704	GO:0005737(cytoplasm);GO:0019903(protein phosphatase binding);GO:0042593(glucose homeostasis);GO:0045725(positive regulation of glycogen biosynthetic process);GO:2000467(positive regulation of glycogen (starch) synthase activity);GO:2001069(glycogen binding)	04910(Insulin signaling pathway);04931(Insulin resistance)	K07189	NA	PREDICTED: protein phosphatase 1 regulatory subunit 3G [Rattus norvegicus]	0.42487	1.44092	22.4058	2.53168	0.0748185	-3.74046	9.53625e-05	0.00953784	down	yes
ENSRNOG00000032394	Tymp	ENSRNOT00000040541	GO:0003674(molecular_function);GO:0004645(phosphorylase activity);GO:0005575(cellular_component);GO:0005829(cytosol);GO:0006206(pyrimidine nucleobase metabolic process);GO:0006213(pyrimidine nucleoside metabolic process);GO:0006220(pyrimidine nucleotide metabolic process);GO:0008150(biological_process);GO:0009032(thymidine phosphorylase activity);GO:0016154(pyrimidine-nucleoside phosphorylase act…	00240(Pyrimidine metabolism);00983(Drug metabolism - other enzymes);05219(Bladder cancer)	K00758	EC:2.4.2.4	thymidine phosphorylase [Rattus norvegicus]	176.481	309.767	66.4688	74.5377	3.44841	1.78593	0.000103816	0.0102975	up	yes
ENSRNOG00000020990	Fgf21	ENSRNOT00000028490	GO:0003674(molecular_function);GO:0005104(fibroblast growth factor receptor binding);GO:0005615(extracellular space);GO:0008083(growth factor activity);GO:0008284(positive regulation of cell proliferation);GO:0010898(positive regulation of triglyceride catabolic process);GO:0014823(response to activity);GO:0030968(endoplasmic reticulum unfolded protein response);GO:0031667(response to nutrient le…	04014(Ras signaling pathway);04015(Rap1 signaling pathway);04010(MAPK signaling pathway);04151(PI3K-Akt signaling pathway);04810(Regulation of actin cytoskeleton);05200(Pathways in cancer);05218(Melanoma)	K04358	NA	fibroblast growth factor 21 precursor [Rattus norvegicus]	64.6032	14.2946	5.87359	8.75802	5.39228	2.4309	0.000107164	0.0105425	up	yes
ENSRNOG00000003899	Krt14	ENSRNOT00000005285;ENSRNOT00000083895	GO:0003674(molecular_function);GO:0005198(structural molecule activity);GO:0005622(intracellular);GO:0005634(nucleus);GO:0005737(cytoplasm);GO:0005882(intermediate filament);GO:0007568(aging);GO:0010043(response to zinc ion);GO:0010212(response to ionizing radiation);GO:0030855(epithelial cell differentiation);GO:0042633(hair cycle);GO:0045095(keratin filament);GO:0045110(intermediate filament bu…	05150(Staphylococcus aureus infection);05150(Staphylococcus aureus infection)	K07604	NA	keratin, type I cytoskeletal 14 [Rattus norvegicus]	1.31675	0.966393	0.113315	0	20.1486	4.33261	0.00011061	0.0107931	up	yes
ENSRNOG00000032989	Lrrn4	ENSRNOT00000040802	GO:0005887(integral component of plasma membrane);GO:0007616(long-term memory);GO:0008542(visual learning);GO:0070062(extracellular exosome)	NA	NA	NA	PREDICTED: leucine-rich repeat neuronal protein 4 [Rattus norvegicus]	0.852354	1.17291	0.149287	0.031103	11.2271	3.48892	0.000112656	0.010904	up	yes
ENSRNOG00000033748	AABR07060610.1	ENSRNOT00000041683	GO:0000027(ribosomal large subunit assembly);GO:0003735(structural constituent of ribosome);GO:0005634(nucleus);GO:0005730(nucleolus);GO:0005737(cytoplasm);GO:0005840(ribosome);GO:0005925(focal adhesion);GO:0006412(translation);GO:0016020(membrane);GO:0022625(cytosolic large ribosomal subunit);GO:0044822(poly(A) RNA binding);GO:0045901(positive regulation of translational elongation);GO:0070062(e…	03010(Ribosome)	K02870	NA	unnamed protein product [Mus musculus]	14.1469	34.0265	4.4819	5.89725	4.64136	2.21455	0.000114148	0.01096	up	yes
ENSRNOG00000034191	Fmo1	ENSRNOT00000041908;ENSRNOT00000081551	GO:0004497(monooxygenase activity);GO:0004499(N,N-dimethylaniline monooxygenase activity);GO:0005789(endoplasmic reticulum membrane);GO:0006082(organic acid metabolic process);GO:0006970(response to osmotic stress);GO:0009404(toxin metabolic process);GO:0016021(integral component of membrane);GO:0017144(drug metabolic process);GO:0032496(response to lipopolysaccharide);GO:0043231(intracellular me…	00982(Drug metabolism - cytochrome P450);00982(Drug metabolism - cytochrome P450)	K00485	EC:1.14.13.8	PREDICTED: dimethylaniline monooxygenase [N-oxide-forming] 1 isoform X1 [Rattus norvegicus]	10.7797	11.4772	32.6742	33.989	0.333872	-1.58263	0.000136675	0.0130188	down	yes
ENSRNOG00000020501	Tjp3	ENSRNOT00000089004;ENSRNOT00000027847	GO:0005634(nucleus);GO:0005923(bicellular tight junction);GO:0016324(apical plasma membrane);GO:2000045(regulation of G1/S transition of mitotic cell cycle);GO:2000045(regulation of G1/S transition of mitotic cell cycle)	04530(Tight junction);04530(Tight junction)	K06097	NA	tight junction protein ZO-3 [Rattus norvegicus]	13.5437	14.7571	4.34221	5.50943	2.87269	1.5224	0.000141443	0.0133669	up	yes
ENSRNOG00000008015	Fos	ENSRNOT00000010712	GO:0000978(RNA polymerase II core promoter proximal region sequence-specific DNA binding);GO:0000979(RNA polymerase II core promoter sequence-specific DNA binding);GO:0000982(transcription factor activity, RNA polymerase II core promoter proximal region sequence-specific binding);GO:0001077(transcriptional activator activity, RNA polymerase II core promoter proximal region sequence-specific bindi…	04010(MAPK signaling pathway);04668(TNF signaling pathway);04024(cAMP signaling pathway);04210(Apoptosis);04620(Toll-like receptor signaling pathway);04660(T cell receptor signaling pathway);04662(B cell receptor signaling pathway);04915(Estrogen signaling pathway);04917(Prolactin signaling pathway);04921(Oxytocin signaling pathway);04725(Cholinergic synapse);04728(Dopaminergic synapse);04380(Ost…	K04379	NA	proto-oncogene c-Fos [Rattus norvegicus]	11.9423	23.2885	5.00301	1.16551	5.7114	2.51384	0.000143635	0.013468	up	yes
ENSRNOG00000046414	LOC108348048	ENSRNOT00000000211	GO:0005634(nucleus);GO:0005654(nucleoplasm)	03410(Base excision repair)	K10798	EC:2.4.2.30	PREDICTED: von Willebrand factor A domain-containing protein 5A isoform X3 [Rattus norvegicus]	5.3877	3.59993	0.321409	0	27.9632	4.80546	0.000147515	0.0137247	up	yes
ENSRNOG00000018145	Crat	ENSRNOT00000065128;ENSRNOT00000086717	GO:0004092(carnitine O-acetyltransferase activity);GO:0005102(receptor binding);GO:0005739(mitochondrion);GO:0005743(mitochondrial inner membrane);GO:0005777(peroxisome);GO:0005783(endoplasmic reticulum);GO:0006631(fatty acid metabolic process);GO:0006810(transport);GO:0019254(carnitine metabolic process, CoA-linked);GO:0019254(carnitine metabolic process, CoA-linked)	04146(Peroxisome);04146(Peroxisome)	K00624	EC:2.3.1.7	carnitine O-acetyltransferase [Rattus norvegicus]	61.0431	43.6396	17.5251	17.4742	2.991	1.58063	0.000149479	0.0138004	up	yes
ENSRNOG00000009342	Fcnb	ENSRNOT00000012494	GO:0001664(G-protein coupled receptor binding);GO:0001867(complement activation, lectin pathway);GO:0002752(cell surface pattern recognition receptor signaling pathway);GO:0005576(extracellular region);GO:0005581(collagen trimer);GO:0007186(G-protein coupled receptor signaling pathway);GO:0008329(signaling pattern recognition receptor activity);GO:0030246(carbohydrate binding);GO:0031232(extrinsi…	04512(ECM-receptor interaction)	K06252	NA	ficolin-2 precursor [Rattus norvegicus]	7.21186	1.39007	0.618966	0.226276	10.1769	3.34722	0.00016175	0.0148193	up	yes
ENSRNOG00000056487	Oxr1	ENSRNOT00000078354;ENSRNOT00000079962;ENSRNOT00000091355;ENSRNOT00000084940;ENSRNOT00000081948	GO:0005730(nucleolus);GO:0005739(mitochondrion);GO:0006979(response to oxidative stress);GO:0007628(adult walking behavior);GO:0016491(oxidoreductase activity);GO:0043524(negative regulation of neuron apoptotic process);GO:0055114(oxidation-reduction process);GO:0071447(cellular response to hydroperoxide);GO:0071447(cellular response to hydroperoxide)	03018(RNA degradation);03018(RNA degradation)	K12587	NA	oxidation resistance protein 1 isoform 3 [Rattus norvegicus]	1.06049	1.54276	4.44558	4.27443	0.298537	-1.74402	0.000167216	0.0151393	down	yes
ENSRNOG00000007829	Lactb2	ENSRNOT00000010369	GO:0005739(mitochondrion);GO:0016787(hydrolase activity);GO:0046872(metal ion binding)	NA	NA	NA	endoribonuclease LACTB2 [Rattus norvegicus]	13.2497	15.4625	45.0733	40.8043	0.334337	-1.58062	0.000167766	0.0151393	down	yes
ENSRNOG00000021802	Isg15	ENSRNOT00000039263	GO:0005576(extracellular region);GO:0019941(modification-dependent protein catabolic process);GO:0031386(protein tag);GO:0031397(negative regulation of protein ubiquitination);GO:0032020(ISG15-protein conjugation);GO:0032649(regulation of interferon-gamma production);GO:0034340(response to type I interferon);GO:0042742(defense response to bacterium);GO:0045071(negative regulation of viral genome …	04622(RIG-I-like receptor signaling pathway)	K12159	NA	ubiquitin-like protein ISG15 [Rattus norvegicus]	177.799	13.1166	9.58349	11.7268	8.95884	3.16331	0.000171543	0.0153646	up	yes
ENSRNOG00000016122	Hmgcr	ENSRNOT00000022055	GO:0004420(hydroxymethylglutaryl-CoA reductase (NADPH) activity);GO:0005778(peroxisomal membrane);GO:0005783(endoplasmic reticulum);GO:0005789(endoplasmic reticulum membrane);GO:0006695(cholesterol biosynthetic process);GO:0006743(ubiquinone metabolic process);GO:0007568(aging);GO:0007584(response to nutrient);GO:0008284(positive regulation of cell proliferation);GO:0008299(isoprenoid biosyntheti…	00900(Terpenoid backbone biosynthesis);04152(AMPK signaling pathway);04976(Bile secretion)	K00021	EC:1.1.1.34	PREDICTED: 3-hydroxy-3-methylglutaryl-coenzyme A reductase isoform X1 [Rattus norvegicus]	6.28277	8.91217	19.2566	31.0887	0.301815	-1.72827	0.000177962	0.0158215	down	yes
ENSRNOG00000056032	AABR07035780.1	ENSRNOT00000089026	GO:2000359(regulation of binding of sperm to zona pellucida)	04512(ECM-receptor interaction);04510(Focal adhesion)	K03900	NA	PREDICTED: LOW QUALITY PROTEIN: zonadhesin isoform X1 [Rattus norvegicus]	19.3531	14.5689	4.55046	6.59091	3.0447	1.6063	0.000184552	0.0162867	up	yes
ENSRNOG00000048771	RGD1559482	ENSRNOT00000085222;ENSRNOT00000074082	GO:0016021(integral component of membrane);GO:0016021(integral component of membrane)	04672(Intestinal immune network for IgA production);04672(Intestinal immune network for IgA production)	K13073	NA	immune activating receptor CD300d1 precursor [Rattus norvegicus]	3.08654	1.15177	0.246016	0.307951	7.65083	2.93562	0.000195313	0.017107	up	yes
ENSRNOG00000030174	AABR07042903.1	ENSRNOT00000084913;ENSRNOT00000043480	GO:0003723(RNA binding);GO:0003735(structural constituent of ribosome);GO:0005840(ribosome);GO:0006412(translation);GO:0022627(cytosolic small ribosomal subunit);GO:0022627(cytosolic small ribosomal subunit)	03010(Ribosome);03010(Ribosome)	K02981	NA	unnamed protein product [Mus musculus]	1.20634	51.8456	1.65133	1.05605	19.5953	4.29243	0.000196697	0.017107	up	yes
ENSRNOG00000028814	Oasl2	ENSRNOT00000001600	GO:0001730(2'-5'-oligoadenylate synthetase activity);GO:0003725(double-stranded RNA binding);GO:0005524(ATP binding);GO:0006955(immune response);GO:0009615(response to virus);GO:0016740(transferase activity);GO:0045087(innate immune response);GO:0046872(metal ion binding);GO:0051607(defense response to virus)	05168(Herpes simplex infection)	K14216	EC:2.7.7.84	PREDICTED: 2'-5'-oligoadenylate synthase-like protein 2 isoform X1 [Rattus norvegicus]	49.9429	4.1035	3.24994	3.39303	8.13588	3.0243	0.000200782	0.0173366	up	yes
ENSRNOG00000003515	Ephx1	ENSRNOT00000085279;ENSRNOT00000004780	GO:0001889(liver development);GO:0004301(epoxide hydrolase activity);GO:0005789(endoplasmic reticulum membrane);GO:0006725(cellular aromatic compound metabolic process);GO:0009636(response to toxic substance);GO:0014070(response to organic cyclic compound);GO:0016021(integral component of membrane);GO:0019439(aromatic compound catabolic process);GO:0019899(enzyme binding);GO:0033961(cis-stilbene-…	00980(Metabolism of xenobiotics by cytochrome P450);04976(Bile secretion);05204(Chemical carcinogenesis);05204(Chemical carcinogenesis)	K01253	EC:3.3.2.9	epoxide hydrolase 1 precursor [Rattus norvegicus]	87.4904	104.847	325.168	278.748	0.318483	-1.65071	0.000204276	0.0175123	down	yes
ENSRNOG00000008465	Tmem176b	ENSRNOT00000078473;ENSRNOT00000011327	GO:0016021(integral component of membrane);GO:0030154(cell differentiation);GO:0031965(nuclear membrane);GO:2001199(negative regulation of dendritic cell differentiation);GO:2001199(negative regulation of dendritic cell differentiation)	NA	NA	NA	LR8 protein, isoform CRA_a [Rattus norvegicus]	285.627	184.4	87.7638	53.7339	3.3218	1.73197	0.000212695	0.0181047	up	yes
ENSRNOG00000004303	Timp3	ENSRNOT00000005746	GO:0002020(protease binding);GO:0004857(enzyme inhibitor activity);GO:0005576(extracellular region);GO:0005578(proteinaceous extracellular matrix);GO:0005604(basement membrane);GO:0005615(extracellular space);GO:0005634(nucleus);GO:0005737(cytoplasm);GO:0008191(metalloendopeptidase inhibitor activity);GO:0010466(negative regulation of peptidase activity);GO:0030414(peptidase inhibitor activity);G…	05206(MicroRNAs in cancer);05205(Proteoglycans in cancer)	K16866	NA	metalloproteinase inhibitor 3 precursor [Rattus norvegicus]	0.763253	0.5434	5.5106	1.98687	0.174279	-2.52053	0.000219508	0.0185531	down	yes
ENSRNOG00000023397	LOC100911104	ENSRNOT00000031916	GO:0005886(plasma membrane);GO:0031225(anchored component of membrane)	NA	NA	NA	Ly6-C antigen precursor [Rattus norvegicus]	130.689	4.41374	3.3482	6.35068	13.9298	3.8001	0.000239462	0.0200981	up	yes
ENSRNOG00000057101	AABR07050652.1	ENSRNOT00000091594	NA	NA	NA	NA	rCG56442 [Rattus norvegicus]	5.24044	5.96956	1.26632	1.33743	4.30532	2.10612	0.000247346	0.0206156	up	yes
ENSRNOG00000038106	AABR07026424.1	ENSRNOT00000019033	GO:0000045(autophagosome assembly);GO:0000421(autophagosome membrane);GO:0000422(mitophagy);GO:0005622(intracellular);GO:0005737(cytoplasm);GO:0005739(mitochondrion);GO:0005776(autophagosome);GO:0005829(cytosol);GO:0005874(microtubule);GO:0005875(microtubule associated complex);GO:0005930(axoneme);GO:0006914(autophagy);GO:0006995(cellular response to nitrogen starvation);GO:0008017(microtubule bi…	04068(FoxO signaling pathway);04140(Regulation of autophagy)	K08341	NA	microtubule-associated proteins 1A/1B light chain 3B [Rattus norvegicus]	0.877947	0.928278	4.86419	6.09584	0.164801	-2.6012	0.000249998	0.020693	down	yes
ENSRNOG00000011973	Il7	ENSRNOT00000016091	GO:0002360(T cell lineage commitment);GO:0003674(molecular_function);GO:0005125(cytokine activity);GO:0005139(interleukin-7 receptor binding);GO:0005575(cellular_component);GO:0005615(extracellular space);GO:0006955(immune response);GO:0006959(humoral immune response);GO:0007267(cell-cell signaling);GO:0008083(growth factor activity);GO:0009887(organ morphogenesis);GO:0010165(response to X-ray);G…	04630(Jak-STAT signaling pathway);04151(PI3K-Akt signaling pathway);04060(Cytokine-cytokine receptor interaction);04640(Hematopoietic cell lineage)	K05431	NA	interleukin-7 precursor [Rattus norvegicus]	2.52036	1.22261	0.308804	0.143535	8.2747	3.04871	0.000261109	0.0214646	up	yes
ENSRNOG00000004756	Syt2	ENSRNOT00000006637	GO:0005509(calcium ion binding);GO:0005515(protein binding);GO:0005544(calcium-dependent phospholipid binding);GO:0005829(cytosol);GO:0005886(plasma membrane);GO:0006906(vesicle fusion);GO:0007269(neurotransmitter secretion);GO:0008021(synaptic vesicle);GO:0016021(integral component of membrane);GO:0016079(synaptic vesicle exocytosis);GO:0017158(regulation of calcium ion-dependent exocytosis);GO:…	04721(Synaptic vesicle cycle)	K15290	NA	synaptotagmin II [Rattus norvegicus]	0.102161	0.154936	0.844969	0.882994	0.148786	-2.74869	0.000267984	0.0218799	down	yes
ENSRNOG00000021474	Siglec5	ENSRNOT00000033648	GO:0016021(integral component of membrane);GO:0048029(monosaccharide binding)	04640(Hematopoietic cell lineage)	K06473	NA	PREDICTED: sialic acid-binding Ig-like lectin 5 isoform X3 [Rattus norvegicus]	2.00034	3.41718	0.369752	0.794832	4.65189	2.21782	0.00029811	0.0240875	up	yes
ENSRNOG00000008706	Tbx3	ENSRNOT00000084018;ENSRNOT00000011552	GO:0000122(negative regulation of transcription from RNA polymerase II promoter);GO:0000978(RNA polymerase II core promoter proximal region sequence-specific DNA binding);GO:0001078(transcriptional repressor activity, RNA polymerase II core promoter proximal region sequence-specific binding);GO:0001085(RNA polymerase II transcription factor binding);GO:0001102(RNA polymerase II activating transcr…	04550(Signaling pathways regulating pluripotency of stem cells);04550(Signaling pathways regulating pluripotency of stem cells)	K10177	NA	T-box transcription factor TBX3 [Rattus norvegicus]	6.10764	3.80943	1.72753	0.960618	3.68918	1.8833	0.000299037	0.0240875	up	yes
ENSRNOG00000057201	AABR07035782.1	ENSRNOT00000087948	GO:2000359(regulation of binding of sperm to zona pellucida)	04330(Notch signaling pathway);04320(Dorso-ventral axis formation)	K02599	NA	PREDICTED: zonadhesin isoform X2 [Rattus norvegicus]	15.1946	14.072	4.09031	6.18762	2.84752	1.50971	0.000302156	0.0241765	up	yes
ENSRNOG00000007041	Abcg2	ENSRNOT00000009546;ENSRNOT00000088983	GO:0005524(ATP binding);GO:0005634(nucleus);GO:0005886(plasma membrane);GO:0006855(drug transmembrane transport);GO:0008559(xenobiotic-transporting ATPase activity);GO:0010039(response to iron ion);GO:0015238(drug transmembrane transporter activity);GO:0015747(urate transport);GO:0015893(drug transport);GO:0016020(membrane);GO:0016021(integral component of membrane);GO:0016324(apical plasma membr…	02010(ABC transporters);04976(Bile secretion);04976(Bile secretion)	K05681	NA	PREDICTED: ATP-binding cassette sub-family G member 2 isoform X1 [Rattus norvegicus]	8.19428	4.55015	2.05843	1.66163	3.42587	1.77647	0.000318913	0.0253483	up	yes
ENSRNOG00000019982	Ethe1	ENSRNOT00000027075	GO:0005506(iron ion binding);GO:0005654(nucleoplasm);GO:0005737(cytoplasm);GO:0005739(mitochondrion);GO:0006749(glutathione metabolic process);GO:0050313(sulfur dioxygenase activity);GO:0055114(oxidation-reduction process);GO:0070813(hydrogen sulfide metabolic process)	00920(Sulfur metabolism)	K17725	EC:1.13.11.18	persulfide dioxygenase ETHE1, mitochondrial [Rattus norvegicus]	18.8955	25.3214	51.2395	83.3694	0.328484	-1.60611	0.000323836	0.025441	down	yes
ENSRNOG00000022296	Pnpla5	ENSRNOT00000039228	GO:0004806(triglyceride lipase activity);GO:0006629(lipid metabolic process)	00561(Glycerolipid metabolism)	K16816	EC:3.1.1.3	patatin-like phospholipase domain-containing protein 5 [Rattus norvegicus]	2.06992	1.24093	0.329975	0.210235	6.12883	2.61561	0.000324318	0.025441	up	yes
ENSRNOG00000038766	LOC103694328	ENSRNOT00000059225	GO:0000122(negative regulation of transcription from RNA polymerase II promoter);GO:0003723(RNA binding);GO:0005634(nucleus);GO:0005654(nucleoplasm);GO:0005730(nucleolus);GO:0030198(extracellular matrix organization);GO:0048286(lung alveolus development);GO:1902035(positive regulation of hematopoietic stem cell proliferation)	NA	NA	NA	PREDICTED: ataxin-1-like [Rattus norvegicus]	1.33791	1.99684	5.39562	6.43015	0.28199	-1.82628	0.000327149	0.0254964	down	yes
ENSRNOG00000014953	Fbxo39	ENSRNOT00000020071	GO:0019005(SCF ubiquitin ligase complex);GO:0031146(SCF-dependent proteasomal ubiquitin-dependent protein catabolic process)	NA	NA	NA	PREDICTED: F-box only protein 39 isoform X1 [Mus musculus]	3.4037	1.6158	0.387534	0.463147	5.90057	2.56085	0.000333234	0.025803	up	yes
ENSRNOG00000005109	Rprm	ENSRNOT00000006784	GO:0005737(cytoplasm);GO:0007050(cell cycle arrest);GO:0007346(regulation of mitotic cell cycle);GO:0016021(integral component of membrane)	04115(p53 signaling pathway)	K10128	NA	protein reprimo [Rattus norvegicus]	2.59085	4.12763	0.234498	0.837408	6.26779	2.64796	0.000335884	0.0258415	up	yes
ENSRNOG00000016818	Fgfr3	ENSRNOT00000023144;ENSRNOT00000080695	GO:0000122(negative regulation of transcription from RNA polymerase II promoter);GO:0000165(MAPK cascade);GO:0000166(nucleotide binding);GO:0001938(positive regulation of endothelial cell proliferation);GO:0002009(morphogenesis of an epithelium);GO:0002089(lens morphogenesis in camera-type eye);GO:0004672(protein kinase activity);GO:0004713(protein tyrosine kinase activity);GO:0004714(transmembra…	04014(Ras signaling pathway);04015(Rap1 signaling pathway);04010(MAPK signaling pathway);04151(PI3K-Akt signaling pathway);04144(Endocytosis);04810(Regulation of actin cytoskeleton);04550(Signaling pathways regulating pluripotency of stem cells);05200(Pathways in cancer);05230(Central carbon metabolism in cancer);05206(MicroRNAs in cancer);05219(Bladder cancer);05219(Bladder cancer)	K05094	EC:2.7.10.1	PREDICTED: fibroblast growth factor receptor 3 isoform X3 [Rattus norvegicus]	10.8052	16.4411	4.89196	4.60074	2.87023	1.52117	0.00034155	0.0261101	up	yes
ENSRNOG00000008965	Socs2	ENSRNOT00000011948	GO:0001558(regulation of cell growth);GO:0005159(insulin-like growth factor receptor binding);GO:0005737(cytoplasm);GO:0008269(JAK pathway signal transduction adaptor activity);GO:0016567(protein ubiquitination);GO:0032355(response to estradiol);GO:0035556(intracellular signal transduction);GO:0046426(negative regulation of JAK-STAT cascade);GO:0060396(growth hormone receptor signaling pathway)	04630(Jak-STAT signaling pathway);04910(Insulin signaling pathway);04917(Prolactin signaling pathway);04930(Type II diabetes mellitus)	K04695	NA	suppressor of cytokine signaling 2, isoform CRA_a [Rattus norvegicus]	20.2528	19.6554	72.2452	45.9824	0.337554	-1.56681	0.00034906	0.0265153	down	yes
ENSRNOG00000020621	Dcst1	ENSRNOT00000027986	GO:0008270(zinc ion binding);GO:0016021(integral component of membrane)	NA	NA	NA	PREDICTED: DC-STAMP domain-containing protein 1 isoform X2 [Rattus norvegicus]	6.71022	9.35268	1.72139	3.35824	3.16222	1.66094	0.000361757	0.0273069	up	yes
ENSRNOG00000018689	RGD1305464	ENSRNOT00000085049;ENSRNOT00000064830	GO:0005737(cytoplasm);GO:0005737(cytoplasm)	NA	NA	NA	uncharacterized protein LOC315702 [Rattus norvegicus]	7.2584	4.145	1.61017	2.12495	3.05301	1.61023	0.000364715	0.0273582	up	yes
ENSRNOG00000033835	Dnm1	ENSRNOT00000064039;ENSRNOT00000047921	GO:0001917(photoreceptor inner segment);GO:0002031(G-protein coupled receptor internalization);GO:0003924(GTPase activity);GO:0005515(protein binding);GO:0005525(GTP binding);GO:0005737(cytoplasm);GO:0005794(Golgi apparatus);GO:0005874(microtubule);GO:0005886(plasma membrane);GO:0006897(endocytosis);GO:0006898(receptor-mediated endocytosis);GO:0007032(endosome organization);GO:0007605(sensory per…	04072(Phospholipase D signaling pathway);04144(Endocytosis);04961(Endocrine and other factor-regulated calcium reabsorption);04721(Synaptic vesicle cycle);05100(Bacterial invasion of epithelial cells);05100(Bacterial invasion of epithelial cells)	K01528	EC:3.6.5.5	mKIAA4093 protein, partial [Mus musculus]	4.20407	6.12106	1.87125	1.04938	3.53525	1.82181	0.000404181	0.0301303	up	yes
ENSRNOG00000014900	Crem	ENSRNOT00000089536;ENSRNOT00000020204;ENSRNOT00000020012;ENSRNOT00000074146;ENSRNOT00000020160;ENSRNOT00000092187;ENSRNOT00000068545	GO:0001046(core promoter sequence-specific DNA binding);GO:0003677(DNA binding);GO:0003700(transcription factor activity, sequence-specific DNA binding);GO:0005634(nucleus);GO:0005667(transcription factor complex);GO:0005737(cytoplasm);GO:0006006(glucose metabolic process);GO:0006351(transcription, DNA-templated);GO:0006355(regulation of transcription, DNA-templated);GO:0006631(fatty acid metabol…	04261(Adrenergic signaling in cardiomyocytes);05166(HTLV-I infection);05166(HTLV-I infection)	K09052	NA	induced cAMP early repressor, ICER I [Mus musculus]	1.01047	0.829078	2.14644	4.3263	0.2842	-1.81502	0.000414587	0.0307153	down	yes
ENSRNOG00000018524	Ezr	ENSRNOT00000046746;ENSRNOT00000090033	GO:0000122(negative regulation of transcription from RNA polymerase II promoter);GO:0001726(ruffle);GO:0001772(immunological synapse);GO:0001931(uropod);GO:0001951(intestinal D-glucose absorption);GO:0003376(sphingosine-1-phosphate signaling pathway);GO:0003779(actin binding);GO:0005198(structural molecule activity);GO:0005515(protein binding);GO:0005615(extracellular space);GO:0005622(intracellu…	04810(Regulation of actin cytoskeleton);04670(Leukocyte transendothelial migration);04971(Gastric acid secretion);05206(MicroRNAs in cancer);05205(Proteoglycans in cancer);05205(Proteoglycans in cancer)	K08007	NA	ezrin [Rattus norvegicus]	4.94323	5.92323	1.75784	1.7975	3.05638	1.61182	0.000444503	0.0327296	up	yes
ENSRNOG00000003300	Btg2	ENSRNOT00000004408	GO:0000122(negative regulation of transcription from RNA polymerase II promoter);GO:0001078(transcriptional repressor activity, RNA polymerase II core promoter proximal region sequence-specific binding);GO:0005515(protein binding);GO:0005575(cellular_component);GO:0006351(transcription, DNA-templated);GO:0006479(protein methylation);GO:0006974(cellular response to DNA damage stimulus);GO:0008285(…	03018(RNA degradation)	K14443	NA	protein BTG2 precursor [Rattus norvegicus]	45.675	50.7264	20.1155	8.53154	3.36514	1.75067	0.000465575	0.0340722	up	yes
ENSRNOG00000045989	Hba-a3	ENSRNOT00000052292	GO:0005344(oxygen transporter activity);GO:0005506(iron ion binding);GO:0005833(hemoglobin complex);GO:0015671(oxygen transport);GO:0019825(oxygen binding);GO:0020037(heme binding);GO:0043177(organic acid binding);GO:0051291(protein heterooligomerization)	05144(Malaria);05143(African trypanosomiasis)	K13822	NA	hemoglobin alpha, adult chain 1 [Rattus norvegicus]	8.38496	4.66272	35.6289	16.5081	0.250257	-1.99852	0.000497466	0.0361854	down	yes
ENSRNOG00000001369	Oas1a	ENSRNOT00000038426;ENSRNOT00000067176;ENSRNOT00000048450	GO:0001730(2'-5'-oligoadenylate synthetase activity);GO:0003725(double-stranded RNA binding);GO:0005524(ATP binding);GO:0005634(nucleus);GO:0005737(cytoplasm);GO:0005739(mitochondrion);GO:0005783(endoplasmic reticulum);GO:0006006(glucose metabolic process);GO:0006164(purine nucleotide biosynthetic process);GO:0006955(immune response);GO:0008270(zinc ion binding);GO:0009615(response to virus);GO:0…	05162(Measles);05164(Influenza A);05160(Hepatitis C);05168(Herpes simplex infection);05168(Herpes simplex infection)	K14216	EC:2.7.7.84	PREDICTED: 2'-5'-oligoadenylate synthase 1A isoform X1 [Rattus norvegicus]	31.8256	4.17264	2.83445	3.64677	5.55424	2.47359	0.000503708	0.0364187	up	yes
ENSRNOG00000009629	Car2	ENSRNOT00000013354	GO:0001822(kidney development);GO:0002009(morphogenesis of an epithelium);GO:0004064(arylesterase activity);GO:0004089(carbonate dehydratase activity);GO:0005515(protein binding);GO:0005615(extracellular space);GO:0005737(cytoplasm);GO:0005829(cytosol);GO:0005886(plasma membrane);GO:0005902(microvillus);GO:0006730(one-carbon metabolic process);GO:0008270(zinc ion binding);GO:0009268(response to p…	00910(Nitrogen metabolism);04971(Gastric acid secretion);04972(Pancreatic secretion);04976(Bile secretion);04964(Proximal tubule bicarbonate reclamation);04966(Collecting duct acid secretion)	K18245	EC:4.2.1.1	carbonic anhydrase 2 [Rattus norvegicus]	4.93587	2.86951	9.3454	15.2945	0.316778	-1.65846	0.000517691	0.0372056	down	yes
ENSRNOG00000053321	AABR07070720.1	ENSRNOT00000079017	NA	NA	NA	NA	Onecut1 protein [Mus musculus]	9.30351	5.43758	28.4153	50.2301	0.187438	-2.41552	0.00054973	0.039273	down	yes
ENSRNOG00000061237	Dio1	ENSRNOT00000091521	GO:0004800(thyroxine 5'-deiodinase activity);GO:0005789(endoplasmic reticulum membrane);GO:0006091(generation of precursor metabolites and energy);GO:0008430(selenium binding);GO:0016021(integral component of membrane);GO:0042446(hormone biosynthetic process);GO:0055114(oxidation-reduction process)	04919(Thyroid hormone signaling pathway)	K01562	EC:1.21.99.4	type I iodothyronine deiodinase isoform 1 [Rattus norvegicus]	12.4966	15.3546	62.6107	28.1743	0.306782	-1.70472	0.000562741	0.0398216	down	yes
ENSRNOG00000008194	Znfx1	ENSRNOT00000055127;ENSRNOT00000076833	GO:0003700(transcription factor activity, sequence-specific DNA binding);GO:0005634(nucleus);GO:0006355(regulation of transcription, DNA-templated);GO:0008270(zinc ion binding);GO:0044822(poly(A) RNA binding);GO:0044822(poly(A) RNA binding)	03040(Spliceosome);03040(Spliceosome)	K12874	NA	PREDICTED: NFX1-type zinc finger-containing protein 1 isoform X1 [Rattus norvegicus]	24.5024	5.48455	2.98956	4.19294	4.175	2.06178	0.00056654	0.0398216	up	yes
ENSRNOG00000014456	Coq10b	ENSRNOT00000040461	GO:0005739(mitochondrion);GO:0005743(mitochondrial inner membrane)	NA	NA	NA	coenzyme Q-binding protein COQ10 homolog B, mitochondrial [Rattus norvegicus]	5.09786	3.75994	9.21947	18.9969	0.313924	-1.67151	0.000567714	0.0398216	down	yes
ENSRNOG00000001419	Cldn15	ENSRNOT00000001923	GO:0005198(structural molecule activity);GO:0005923(bicellular tight junction);GO:0006811(ion transport);GO:0016021(integral component of membrane);GO:0016328(lateral plasma membrane)	04514(Cell adhesion molecules (CAMs));04530(Tight junction);04670(Leukocyte transendothelial migration);05160(Hepatitis C)	K06087	NA	claudin-15 [Rattus norvegicus]	1.21097	1.93033	0.327762	0.213674	5.80179	2.5365	0.000570681	0.0398216	up	yes
ENSRNOG00000009066	Thra	ENSRNOT00000012340;ENSRNOT00000087346	GO:0004887(thyroid hormone receptor activity);GO:0070324(thyroid hormone binding);GO:0000976(transcription regulatory region sequence-specific DNA binding);GO:0001502(cartilage condensation);GO:0001503(ossification);GO:0001822(kidney development);GO:0001889(liver development);GO:0002153(steroid receptor RNA activator RNA binding);GO:0002155(regulation of thyroid hormone mediated signaling pathway…	04080(Neuroactive ligand-receptor interaction);04919(Thyroid hormone signaling pathway);04919(Thyroid hormone signaling pathway)	K05547	NA	PREDICTED: LOW QUALITY PROTEIN: thyroid hormone receptor alpha isoform X3 [Cricetulus griseus]	4.01081	4.51499	8.89731	16.2184	0.339461	-1.55868	0.000595715	0.0412442	down	yes
ENSRNOG00000017899	Akr7a3	ENSRNOT00000024160	GO:0004032(alditol:NADP+ 1-oxidoreductase activity);GO:0004033(aldo-keto reductase (NADP) activity);GO:0005737(cytoplasm);GO:0009636(response to toxic substance);GO:0046222(aflatoxin metabolic process);GO:0046223(aflatoxin catabolic process);GO:0055114(oxidation-reduction process);GO:0070062(extracellular exosome)	00980(Metabolism of xenobiotics by cytochrome P450)	K15303	NA	aflatoxin B1 aldehyde reductase member 3 [Rattus norvegicus]	9.65267	11.8228	33.8803	26.4224	0.356128	-1.48953	0.000600789	0.0412442	down	yes
ENSRNOG00000050647	Hspa1a	ENSRNOT00000081924	GO:0000151(ubiquitin ligase complex);GO:0000723(telomere maintenance);GO:0001664(G-protein coupled receptor binding);GO:0002931(response to ischemia);GO:0003674(molecular_function);GO:0005102(receptor binding);GO:0005524(ATP binding);GO:0005575(cellular_component);GO:0005737(cytoplasm);GO:0005739(mitochondrion);GO:0005814(centriole);GO:0005829(cytosol);GO:0005925(focal adhesion);GO:0006281(DNA re…	03040(Spliceosome);04141(Protein processing in endoplasmic reticulum);04010(MAPK signaling pathway);04144(Endocytosis);04612(Antigen processing and presentation);04915(Estrogen signaling pathway);04213(Longevity regulating pathway - multiple species);05020(Prion diseases);05134(Legionellosis);05162(Measles);05164(Influenza A);05169(Epstein-Barr virus infection);05145(Toxoplasmosis)	K03283	NA	heat shock 70 kDa protein 1A [Rattus norvegicus]	3.42372	12.8092	1.3905	2.39397	4.28935	2.10076	0.000601425	0.0412442	up	yes
ENSRNOG00000003125	Rogdi	ENSRNOT00000004176	GO:0005622(intracellular);GO:0005635(nuclear envelope);GO:0007420(brain development);GO:0008284(positive regulation of cell proliferation);GO:0022008(neurogenesis);GO:0030097(hemopoiesis);GO:0042475(odontogenesis of dentin-containing tooth)	05100(Bacterial invasion of epithelial cells)	K16938	NA	protein rogdi homolog [Rattus norvegicus]	38.2098	30.4498	94.6272	91.7561	0.368378	-1.44074	0.000604814	0.0412442	down	yes
ENSRNOG00000011184	Slc13a4	ENSRNOT00000059892	GO:0005887(integral component of plasma membrane);GO:0015382(sodium:sulfate symporter activity);GO:0035725(sodium ion transmembrane transport)	NA	NA	NA	solute carrier family 13 member 4 precursor [Rattus norvegicus]	4.48028	5.32226	10.8473	17.4629	0.346256	-1.53009	0.000615852	0.0416987	down	yes
ENSRNOG00000003620	Fmo3	ENSRNOT00000004864	GO:0004497(monooxygenase activity);GO:0004499(N,N-dimethylaniline monooxygenase activity);GO:0005789(endoplasmic reticulum membrane);GO:0016021(integral component of membrane);GO:0016597(amino acid binding);GO:0017144(drug metabolic process);GO:0034899(trimethylamine monooxygenase activity);GO:0043231(intracellular membrane-bounded organelle);GO:0050660(flavin adenine dinucleotide binding);GO:005…	00982(Drug metabolism - cytochrome P450)	K00485	EC:1.14.13.8	dimethylaniline monooxygenase [N-oxide-forming] 3 [Rattus norvegicus]	44.1938	40.3507	95.0688	146.254	0.350338	-1.51318	0.000618427	0.0416987	down	yes
ENSRNOG00000016488	Pltp	ENSRNOT00000022594	GO:0003674(molecular_function);GO:0005575(cellular_component);GO:0005615(extracellular space);GO:0006629(lipid metabolic process);GO:0008150(biological_process);GO:0008289(lipid binding);GO:0010189(vitamin E biosynthetic process);GO:0010875(positive regulation of cholesterol efflux);GO:0030317(sperm motility);GO:0034375(high-density lipoprotein particle remodeling)	03320(PPAR signaling pathway)	K08761	NA	phospholipid transfer protein precursor [Rattus norvegicus]	12.178	12.8187	29.5978	36.598	0.377617	-1.405	0.000622078	0.0417105	down	yes
ENSRNOG00000029401	Actg2	ENSRNOT00000042699	GO:0005737(cytoplasm);GO:0010628(positive regulation of gene expression);GO:0030027(lamellipodium);GO:0030175(filopodium);GO:0044297(cell body);GO:0090131(mesenchyme migration)	04270(Vascular smooth muscle contraction)	K12315	NA	hypothetical protein A6R68_10896, partial [Neotoma lepida]	0.194662	0	2.2254	0.868669	0.0629146	-3.99046	0.000636851	0.0424638	down	yes
ENSRNOG00000053410	Adcy10	ENSRNOT00000082677	GO:0000287(magnesium ion binding);GO:0003351(epithelial cilium movement);GO:0004016(adenylate cyclase activity);GO:0005524(ATP binding);GO:0005634(nucleus);GO:0005737(cytoplasm);GO:0005739(mitochondrion);GO:0005829(cytosol);GO:0005886(plasma membrane);GO:0006171(cAMP biosynthetic process);GO:0007283(spermatogenesis);GO:0015630(microtubule cytoskeleton);GO:0016020(membrane);GO:0030145(manganese io…	00230(Purine metabolism);04024(cAMP signaling pathway);04713(Circadian entrainment)	K11265	EC:4.6.1.1	adenylate cyclase type 10 [Rattus norvegicus]	0.39944	0.172447	0.901398	1.79394	0.212176	-2.23666	0.000643215	0.0426512	down	yes
ENSRNOG00000001187	Oasl	ENSRNOT00000001570	GO:0001730(2'-5'-oligoadenylate synthetase activity);GO:0003677(DNA binding);GO:0003725(double-stranded RNA binding);GO:0005524(ATP binding);GO:0005730(nucleolus);GO:0005737(cytoplasm);GO:0009615(response to virus);GO:0016020(membrane);GO:0044822(poly(A) RNA binding);GO:0045071(negative regulation of viral genome replication);GO:0045087(innate immune response);GO:0051607(defense response to virus)	05168(Herpes simplex infection)	K14216	EC:2.7.7.84	RecName: Full=2'-5'-oligoadenylate synthase-like protein 1	38.1442	2.615	1.88797	3.44292	7.64587	2.93468	0.000651552	0.0429667	up	yes
ENSRNOG00000032708	RT1-Bb	ENSRNOT00000000525;ENSRNOT00000079126;ENSRNOT00000086283;ENSRNOT00000082136;ENSRNOT00000083231;ENSRNOT00000084246	GO:0002344(B cell affinity maturation);GO:0002381(immunoglobulin production involved in immunoglobulin mediated immune response);GO:0002455(humoral immune response mediated by circulating immunoglobulin);GO:0002504(antigen processing and presentation of peptide or polysaccharide antigen via MHC class II);GO:0002579(positive regulation of antigen processing and presentation);GO:0002827(positive re…	04514(Cell adhesion molecules (CAMs));04145(Phagosome);04612(Antigen processing and presentation);04672(Intestinal immune network for IgA production);05310(Asthma);05322(Systemic lupus erythematosus);05323(Rheumatoid arthritis);05320(Autoimmune thyroid disease);05321(Inflammatiory bowel disease (IBD));05330(Allograft rejection);05332(Graft-versus-host disease);05416(Viral myocarditis);04940(Type …	K06752	NA	RT1 class II, B beta, partial [Rattus norvegicus]	0.956455	0.855657	5.20669	1.89706	0.255092	-1.97091	0.000666187	0.0436917	down	yes
ENSRNOG00000054344	Ier2	ENSRNOT00000088175	GO:0003677(DNA binding);GO:0005634(nucleus);GO:0005654(nucleoplasm);GO:0005737(cytoplasm);GO:0030182(neuron differentiation);GO:0048870(cell motility);GO:0071774(response to fibroblast growth factor)	NA	NA	NA	immediate early response gene 2 protein [Rattus norvegicus]	74.3495	70.2371	27.0532	28.8206	2.58773	1.37169	0.000676227	0.0439991	up	yes
ENSRNOG00000051933	AABR07068043.1	ENSRNOT00000080398	NA	NA	NA	NA		0.578579	0.740151	3.03479	3.8839	0.190604	-2.39135	0.000678206	0.0439991	down	yes
ENSRNOG00000046727	Abcc2	ENSRNOT00000070861	GO:0005515(protein binding);GO:0005524(ATP binding);GO:0005887(integral component of plasma membrane);GO:0006855(drug transmembrane transport);GO:0006979(response to oxidative stress);GO:0007565(female pregnancy);GO:0008514(organic anion transmembrane transporter activity);GO:0009408(response to heat);GO:0009986(cell surface);GO:0015694(mercury ion transport);GO:0015711(organic anion transport);G…	02010(ABC transporters);04976(Bile secretion)	K05666	NA	canalicular multispecific organic anion transporter 1 [Rattus norvegicus]	21.9799	31.4363	94.8446	65.7666	0.332581	-1.58822	0.000693616	0.0446537	down	yes
ENSRNOG00000037060	Odf3b	ENSRNOT00000055805	GO:0003674(molecular_function);GO:0005575(cellular_component);GO:0008150(biological_process)	NA	NA	NA	outer dense fiber protein 3B [Rattus norvegicus]	2.32872	3.83423	0.475263	0.644166	5.50545	2.46086	0.000695737	0.0446537	up	yes
ENSRNOG00000060745	Nlrp12	ENSRNOT00000086331	GO:0005524(ATP binding);GO:0005634(nucleus);GO:0005737(cytoplasm);GO:0008588(release of cytoplasmic sequestered NF-kappaB);GO:0009968(negative regulation of signal transduction);GO:0031953(negative regulation of protein autophosphorylation);GO:0032088(negative regulation of NF-kappaB transcription factor activity);GO:0036336(dendritic cell migration);GO:0043122(regulation of I-kappaB kinase/NF-ka…	04621(NOD-like receptor signaling pathway);05133(Pertussis);05164(Influenza A)	K12800	NA	NACHT, LRR and PYD domains-containing protein 12 [Rattus norvegicus]	2.41246	2.43852	5.51161	8.02126	0.358458	-1.48012	0.000720693	0.0460093	down	yes
ENSRNOG00000010813	Tspan14	ENSRNOT00000014772	GO:0005886(plasma membrane);GO:0005887(integral component of plasma membrane);GO:0007166(cell surface receptor signaling pathway);GO:0009986(cell surface);GO:0019899(enzyme binding);GO:0045747(positive regulation of Notch signaling pathway);GO:0051604(protein maturation);GO:0090002(establishment of protein localization to plasma membrane);GO:0097197(tetraspanin-enriched microdomain)	04142(Lysosome)	K06497	NA	PREDICTED: tetraspanin-14 [Oryctolagus cuniculus]	14.1789	14.5795	5.42181	5.25441	2.69369	1.42959	0.000734408	0.0466369	up	yes
ENSRNOG00000004245	Mgst3	ENSRNOT00000005719	GO:0004364(glutathione transferase activity);GO:0004602(glutathione peroxidase activity);GO:0005575(cellular_component);GO:0005635(nuclear envelope);GO:0005783(endoplasmic reticulum);GO:0010243(response to organonitrogen compound);GO:0016020(membrane);GO:0016021(integral component of membrane);GO:0070062(extracellular exosome)	00480(Glutathione metabolism);00980(Metabolism of xenobiotics by cytochrome P450);00982(Drug metabolism - cytochrome P450);05204(Chemical carcinogenesis)	K00799	EC:2.5.1.18	microsomal glutathione S-transferase 3 [Rattus norvegicus]	25.8368	60.2099	119.106	168.079	0.299622	-1.73879	0.000738508	0.0466504	down	yes
ENSRNOG00000057880	Myh11	ENSRNOT00000084608;ENSRNOT00000087567	GO:0001725(stress fiber);GO:0003774(motor activity);GO:0003779(actin binding);GO:0005516(calmodulin binding);GO:0005524(ATP binding);GO:0005859(muscle myosin complex);GO:0005903(brush border);GO:0006939(smooth muscle contraction);GO:0008307(structural constituent of muscle);GO:0016459(myosin complex);GO:0030016(myofibril);GO:0030485(smooth muscle contractile fiber);GO:0032982(myosin filament);GO:…	04530(Tight junction);04270(Vascular smooth muscle contraction);04270(Vascular smooth muscle contraction)	K10352	NA	myosin-11 [Cricetulus griseus]	0.345914	0.50547	1.88741	1.2031	0.275483	-1.85996	0.000745746	0.046861	down	yes
ENSRNOG00000017154	Atp11a	ENSRNOT00000089447;ENSRNOT00000023163	GO:0000287(magnesium ion binding);GO:0004012(phospholipid-translocating ATPase activity);GO:0005524(ATP binding);GO:0005765(lysosomal membrane);GO:0005783(endoplasmic reticulum);GO:0005886(plasma membrane);GO:0016020(membrane);GO:0016021(integral component of membrane);GO:0043231(intracellular membrane-bounded organelle);GO:0045332(phospholipid translocation);GO:0055037(recycling endosome);GO:005…	04020(Calcium signaling pathway);04261(Adrenergic signaling in cardiomyocytes);04261(Adrenergic signaling in cardiomyocytes)	K05850	EC:3.6.3.8	PREDICTED: probable phospholipid-transporting ATPase IH isoform X3 [Rattus norvegicus]	1.3376	0.662124	0.177558	0.3248	3.98067	1.99301	0.00075925	0.0474441	up	yes
ENSRNOG00000019358	Esr1	ENSRNOT00000081017;ENSRNOT00000078494;ENSRNOT00000026350;ENSRNOT00000088678;ENSRNOT00000089984;ENSRNOT00000082133	GO:0000122(negative regulation of transcription from RNA polymerase II promoter);GO:0000790(nuclear chromatin);GO:0000978(RNA polymerase II core promoter proximal region sequence-specific DNA binding);GO:0001046(core promoter sequence-specific DNA binding);GO:0001077(transcriptional activator activity, RNA polymerase II core promoter proximal region sequence-specific binding);GO:0001223(transcrip…	04915(Estrogen signaling pathway);04917(Prolactin signaling pathway);04919(Thyroid hormone signaling pathway);04961(Endocrine and other factor-regulated calcium reabsorption);05205(Proteoglycans in cancer);05205(Proteoglycans in cancer)	K08550	NA	estrogen receeptor [Rattus norvegicus]	0.951937	0.357756	0.126505	0.103873	5.68498	2.50716	0.000762933	0.0474441	up	yes
ENSRNOG00000000172	Sqor	ENSRNOT00000068129	GO:0005739(mitochondrion);GO:0005743(mitochondrial inner membrane);GO:0016491(oxidoreductase activity);GO:0055114(oxidation-reduction process);GO:0070221(sulfide oxidation, using sulfide:quinone oxidoreductase);GO:0070224(sulfide:quinone oxidoreductase activity);GO:0070813(hydrogen sulfide metabolic process)	00920(Sulfur metabolism)	K17218	EC:1.8.5.-	Cc2-17 [Rattus norvegicus]	7.68106	6.74479	15.7308	22.5173	0.377165	-1.40673	0.000773002	0.0478226	down	yes
ENSRNOG00000060464	Plxna3	ENSRNOT00000083148	GO:0002116(semaphorin receptor complex);GO:0005634(nucleus);GO:0005886(plasma membrane);GO:0005887(integral component of plasma membrane);GO:0007411(axon guidance);GO:0017154(semaphorin receptor activity);GO:0021612(facial nerve structural organization);GO:0021637(trigeminal nerve structural organization);GO:0021766(hippocampus development);GO:0021785(branchiomotor neuron axon guidance);GO:002186…	04360(Axon guidance)	K06820	NA	PREDICTED: plexin-A3 isoform X1 [Rattus norvegicus]	0.38566	1.19889	0.166305	0.148387	5.03524	2.33206	0.000792942	0.0488046	up	yes
ENSRNOG00000016275	Ttr	ENSRNOT00000022113	GO:0005179(hormone activity);GO:0005615(extracellular space);GO:0042403(thyroid hormone metabolic process);GO:0042562(hormone binding);GO:0042572(retinol metabolic process);GO:0042802(identical protein binding);GO:0043234(protein complex);GO:0046982(protein heterodimerization activity);GO:0070062(extracellular exosome);GO:0070324(thyroid hormone binding);GO:0070327(thyroid hormone transport)	NA	NA	NA	transthyretin precursor [Rattus norvegicus]	3504.61	3994.7	8600.96	12619.8	0.353394	-1.50065	0.000802298	0.0491285	down	yes
ENSRNOG00000010896	Tprn	ENSRNOT00000014489	GO:0003674(molecular_function);GO:0007605(sensory perception of sound);GO:0019902(phosphatase binding);GO:0032420(stereocilium)	NA	NA	NA	taperin [Rattus norvegicus]	3.3389	3.48616	1.20198	0.706385	3.57639	1.8385	0.000808781	0.049274	up	yes
ENSRNOG00000000034	Nuak2	ENSRNOT00000000039	GO:0000287(magnesium ion binding);GO:0004674(protein serine/threonine kinase activity);GO:0005524(ATP binding);GO:0005634(nucleus);GO:0005737(cytoplasm);GO:0006468(protein phosphorylation);GO:0006915(apoptotic process);GO:0030036(actin cytoskeleton organization);GO:0035556(intracellular signal transduction);GO:0042149(cellular response to glucose starvation);GO:0043066(negative regulation of apop…	04068(FoxO signaling pathway);04150(mTOR signaling pathway);04140(Regulation of autophagy);04931(Insulin resistance)	K07198	EC:2.7.11.11	NUAK family SNF1-like kinase 2 [Rattus norvegicus]	15.5057	8.6958	5.14145	3.11722	2.93044	1.55112	0.000824557	0.0499815	up	yes
ENSRNOG00000039931	AABR07069371.1	ENSRNOT00000061339	GO:0003674(molecular_function);GO:0005615(extracellular space);GO:0008150(biological_process);GO:0009897(external side of plasma membrane);GO:0016021(integral component of membrane);GO:0019898(extrinsic component of membrane);GO:0031982(vesicle);GO:0070062(extracellular exosome)	NA	NA	NA	PREDICTED: mucin-16 isoform X1 [Rattus norvegicus]	0.25351	1.81151	0.121071	0.160914	7.32316	2.87247	0.00082929	0.0500158	up	yes
ENSRNOG00000029510	Plxnb1	ENSRNOT00000043345	GO:0002116(semaphorin receptor complex);GO:0005887(integral component of plasma membrane);GO:0007162(negative regulation of cell adhesion);GO:0008360(regulation of cell shape);GO:0014068(positive regulation of phosphatidylinositol 3-kinase signaling);GO:0017154(semaphorin receptor activity);GO:0030334(regulation of cell migration);GO:0032794(GTPase activating protein binding);GO:0033689(negative …	04360(Axon guidance)	K06821	NA	PREDICTED: plexin-B1 [Rattus norvegicus]	2.86604	5.87578	0.828666	1.86293	3.24782	1.69947	0.000860667	0.0515291	up	yes
ENSRNOG00000062125	Aox3	ENSRNOT00000092906;ENSRNOT00000092786;ENSRNOT00000092841;ENSRNOT00000093120;ENSRNOT00000093062;ENSRNOT00000092926	GO:0004031(aldehyde oxidase activity);GO:0004854(xanthine dehydrogenase activity);GO:0005506(iron ion binding);GO:0005829(cytosol);GO:0009055(electron carrier activity);GO:0009115(xanthine catabolic process);GO:0016614(oxidoreductase activity, acting on CH-OH group of donors);GO:0016903(oxidoreductase activity, acting on the aldehyde or oxo group of donors);GO:0050660(flavin adenine dinucleotide …	00280(Valine, leucine and isoleucine degradation);00350(Tyrosine metabolism);00380(Tryptophan metabolism);00750(Vitamin B6 metabolism);00760(Nicotinate and nicotinamide metabolism);00830(Retinol metabolism);00982(Drug metabolism - cytochrome P450);04630(Jak-STAT signaling pathway);04630(Jak-STAT signaling pathway)	K00157	EC:1.2.3.1		4.58264	3.82764	10.4737	11.2861	0.386506	-1.37144	0.000862969	0.0515291	down	yes
ENSRNOG00000001091	Hip1r	ENSRNOT00000034264	GO:0003779(actin binding);GO:0005856(cytoskeleton);GO:0005905(clathrin-coated pit);GO:0006915(apoptotic process);GO:0030136(clathrin-coated vesicle);GO:0030276(clathrin binding);GO:0035091(phosphatidylinositol binding);GO:0072583(clathrin-mediated endocytosis)	05016(Huntington's disease)	K04559	NA	huntingtin-interacting protein 1-related protein isoform 1 [Rattus norvegicus]	9.53837	8.71546	3.22251	4.0836	2.49843	1.32102	0.000870702	0.0517335	up	yes
ENSRNOG00000016356	Got1	ENSRNOT00000022309	GO:0004069(L-aspartate:2-oxoglutarate aminotransferase activity);GO:0004609(phosphatidylserine decarboxylase activity);GO:0005634(nucleus);GO:0005737(cytoplasm);GO:0005739(mitochondrion);GO:0005764(lysosome);GO:0005829(cytosol);GO:0006103(2-oxoglutarate metabolic process);GO:0006107(oxaloacetate metabolic process);GO:0006114(glycerol biosynthetic process);GO:0006531(aspartate metabolic process);G…	01200(Carbon metabolism);01210(2-Oxocarboxylic acid metabolism);01230(Biosynthesis of amino acids);00250(Alanine, aspartate and glutamate metabolism);00270(Cysteine and methionine metabolism);00220(Arginine biosynthesis);00330(Arginine and proline metabolism);00350(Tyrosine metabolism);00360(Phenylalanine metabolism);00400(Phenylalanine, tyrosine and tryptophan biosynthesis)	K14454	EC:2.6.1.1	aspartate aminotransferase, cytoplasmic [Rattus norvegicus]	36.33	57.3064	87.7896	245.2	0.2812	-1.83033	0.000926156	0.0547572	down	yes
ENSRNOG00000010634	Megf11	ENSRNOT00000050649;ENSRNOT00000058007;ENSRNOT00000037941;ENSRNOT00000082401	GO:0010842(retina layer formation);GO:0016021(integral component of membrane);GO:0034109(homotypic cell-cell adhesion);GO:0003674(molecular_function);GO:0005575(cellular_component);GO:0005886(plasma membrane);GO:0016020(membrane);GO:0016020(membrane)	NA	NA	NA	multiple epidermal growth factor-like domains protein 11 isoform 2 precursor [Mus musculus]	0.778629	0.718624	1.54328	4.54464	0.245938	-2.02363	0.000953713	0.0561101	down	yes
ENSRNOG00000015297	RGD1561662	ENSRNOT00000020516	GO:0003674(molecular_function);GO:0005575(cellular_component);GO:0008150(biological_process)	NA	NA	NA	PREDICTED: uncharacterized protein C6orf132 homolog isoform X1 [Rattus norvegicus]	8.68592	4.89225	2.29489	2.70801	2.71406	1.44045	0.00100905	0.0590762	up	yes
ENSRNOG00000032508	Acot5	ENSRNOT00000013760	GO:0000038(very long-chain fatty acid metabolic process);GO:0001676(long-chain fatty acid metabolic process);GO:0005829(cytosol);GO:0006637(acyl-CoA metabolic process);GO:0032788(saturated monocarboxylic acid metabolic process);GO:0032789(unsaturated monocarboxylic acid metabolic process);GO:0047617(acyl-CoA hydrolase activity)	00062(Fatty acid elongation);01040(Biosynthesis of unsaturated fatty acids)	K01068	EC:3.1.2.2	acyl-coenzyme A thioesterase 5 [Rattus norvegicus]	43.3305	62.7987	21.7656	18.2061	2.65511	1.40877	0.00102069	0.0594674	up	yes
ENSRNOG00000002159	Gpat3	ENSRNOT00000002936	GO:0003841(1-acylglycerol-3-phosphate O-acyltransferase activity);GO:0004366(glycerol-3-phosphate O-acyltransferase activity);GO:0005783(endoplasmic reticulum);GO:0005789(endoplasmic reticulum membrane);GO:0016021(integral component of membrane);GO:0016024(CDP-diacylglycerol biosynthetic process);GO:0019432(triglyceride biosynthetic process);GO:0032006(regulation of TOR signaling)	00561(Glycerolipid metabolism);00564(Glycerophospholipid metabolism)	K13506	EC:2.3.1.15	glycerol-3-phosphate acyltransferase 3 [Rattus norvegicus]	0.208768	0.143935	0.495856	1.71903	0.159242	-2.65071	0.00105872	0.0612121	down	yes
ENSRNOG00000011490	Angptl8	ENSRNOT00000015381	GO:0005179(hormone activity);GO:0005576(extracellular region);GO:0006006(glucose metabolic process);GO:0010954(positive regulation of protein processing);GO:0019216(regulation of lipid metabolic process);GO:0044255(cellular lipid metabolic process);GO:0044342(type B pancreatic cell proliferation);GO:0045444(fat cell differentiation);GO:0048469(cell maturation);GO:0050746(regulation of lipoprotein…	NA	NA	NA	angiopoietin-like protein 8 precursor [Rattus norvegicus]	285.136	154.095	83.1619	77.5077	2.73375	1.45088	0.00106083	0.0612121	up	yes
ENSRNOG00000046975	Sult4a1	ENSRNOT00000075099	GO:0001517(N-acetylglucosamine 6-O-sulfotransferase activity);GO:0001537(N-acetylgalactosamine 4-O-sulfotransferase activity);GO:0004394(heparan sulfate 2-O-sulfotransferase activity);GO:0005737(cytoplasm);GO:0006629(lipid metabolic process);GO:0006790(sulfur compound metabolic process);GO:0008146(sulfotransferase activity);GO:0008202(steroid metabolic process);GO:0016232(HNK-1 sulfotransferase a…	00140(Steroid hormone biosynthesis)	K01016	EC:2.8.2.4	PREDICTED: sulfotransferase 4A1 [Nannospalax galili]	1.38178	0.893299	0.249331	0.052448	7.53889	2.91435	0.00108531	0.0623247	up	yes
ENSRNOG00000020952	Cgn	ENSRNOT00000028440	GO:0000226(microtubule cytoskeleton organization);GO:0003382(epithelial cell morphogenesis);GO:0003774(motor activity);GO:0005903(brush border);GO:0005923(bicellular tight junction);GO:0008017(microtubule binding);GO:0016459(myosin complex);GO:0043296(apical junction complex);GO:0070830(bicellular tight junction assembly)	04530(Tight junction)	K06102	NA	PREDICTED: cingulin [Rattus norvegicus]	8.45367	13.3067	4.44923	3.8326	2.62749	1.39368	0.00109638	0.0625861	up	yes
ENSRNOG00000014034	Olfml2a	ENSRNOT00000018853	GO:0005578(proteinaceous extracellular matrix);GO:0030198(extracellular matrix organization);GO:0042803(protein homodimerization activity);GO:0050840(extracellular matrix binding)	NA	NA	NA	PREDICTED: olfactomedin-like protein 2A isoform X1 [Rattus norvegicus]	0.063256	0.059497	0.35782	0.3212	0.18078	-2.4677	0.00110338	0.0625861	down	yes
ENSRNOG00000019365	Ablim3	ENSRNOT00000026227;ENSRNOT00000080365	GO:0001725(stress fiber);GO:0003779(actin binding);GO:0006351(transcription, DNA-templated);GO:0008270(zinc ion binding);GO:0030027(lamellipodium);GO:0030032(lamellipodium assembly);GO:0030036(actin cytoskeleton organization);GO:0042384(cilium assembly);GO:0045944(positive regulation of transcription from RNA polymerase II promoter);GO:0045944(positive regulation of transcription from RNA polymer…	04360(Axon guidance);04360(Axon guidance)	K07520	NA	PREDICTED: actin-binding LIM protein 3 isoform X3 [Rattus norvegicus]	1.95818	1.42239	4.03206	6.45134	0.322469	-1.63277	0.0011055	0.0625861	down	yes
ENSRNOG00000018669	Jak3	ENSRNOT00000080146;ENSRNOT00000079784;ENSRNOT00000025312	GO:0002250(adaptive immune response);GO:0002731(negative regulation of dendritic cell cytokine production);GO:0004713(protein tyrosine kinase activity);GO:0004715(non-membrane spanning protein tyrosine kinase activity);GO:0005102(receptor binding);GO:0005524(ATP binding);GO:0005737(cytoplasm);GO:0005856(cytoskeleton);GO:0007167(enzyme linked receptor protein signaling pathway);GO:0007169(transmem…	04630(Jak-STAT signaling pathway);04151(PI3K-Akt signaling pathway);04550(Signaling pathways regulating pluripotency of stem cells);04062(Chemokine signaling pathway);05203(Viral carcinogenesis);05340(Primary immunodeficiency);05166(HTLV-I infection);05162(Measles);05169(Epstein-Barr virus infection);05169(Epstein-Barr virus infection)	K11218	EC:2.7.10.2	RecName: Full=Tyrosine-protein kinase JAK3; AltName: Full=Janus kinase 3; Short=JAK-3	14.6503	12.6452	5.61773	5.54649	2.4449	1.28978	0.00111818	0.0627672	up	yes
ENSRNOG00000005250	Abcg5	ENSRNOT00000007174	GO:0005524(ATP binding);GO:0007584(response to nutrient);GO:0007588(excretion);GO:0010212(response to ionizing radiation);GO:0010949(negative regulation of intestinal phytosterol absorption);GO:0015918(sterol transport);GO:0016020(membrane);GO:0016324(apical plasma membrane);GO:0016887(ATPase activity);GO:0017127(cholesterol transporter activity);GO:0030300(regulation of intestinal cholesterol ab…	02010(ABC transporters);04976(Bile secretion);04975(Fat digestion and absorption)	K05683	NA	ATP-binding cassette sub-family G member 5 [Rattus norvegicus]	1.22894	2.03639	5.73625	4.97489	0.304853	-1.71381	0.00111916	0.0627672	down	yes
ENSRNOG00000032232	Snrpg	ENSRNOT00000050931	GO:0000387(spliceosomal snRNP assembly);GO:0000398(mRNA splicing, via spliceosome);GO:0003723(RNA binding);GO:0005682(U5 snRNP);GO:0005683(U7 snRNP);GO:0005685(U1 snRNP);GO:0005686(U2 snRNP);GO:0005687(U4 snRNP);GO:0005689(U12-type spliceosomal complex);GO:0005732(small nucleolar ribonucleoprotein complex);GO:0005829(cytosol);GO:0034709(methylosome);GO:0034719(SMN-Sm protein complex);GO:0043186(P…	03040(Spliceosome)	K11099	NA	small nuclear ribonucleoprotein G isoform a [Homo sapiens]	2.79302	1.48361	5.27396	19.7396	0.170972	-2.54817	0.00115248	0.0643351	down	yes
ENSRNOG00000014338	Slc25a25	ENSRNOT00000020206	GO:0002021(response to dietary excess);GO:0003735(structural constituent of ribosome);GO:0005509(calcium ion binding);GO:0005739(mitochondrion);GO:0005743(mitochondrial inner membrane);GO:0006412(translation);GO:0014823(response to activity);GO:0016021(integral component of membrane);GO:0032094(response to food);GO:0035264(multicellular organism growth);GO:0043010(camera-type eye development);GO:…	04020(Calcium signaling pathway);04022(cGMP - PKG signaling pathway);05012(Parkinson's disease);05016(Huntington's disease);05166(HTLV-I infection)	K05863	NA	calcium-binding mitochondrial carrier protein SCaMC-2 [Rattus norvegicus]	64.8225	66.9811	203.991	152.254	0.36998	-1.43448	0.00117953	0.0655403	down	yes
ENSRNOG00000007927	Mettl7b	ENSRNOT00000010760	GO:0005737(cytoplasm);GO:0005789(endoplasmic reticulum membrane);GO:0005811(lipid particle);GO:0008757(S-adenosylmethionine-dependent methyltransferase activity);GO:0032259(methylation)	NA	NA	NA	methyltransferase-like protein 7B precursor [Rattus norvegicus]	47.5758	56.1282	106.996	184.364	0.35593	-1.49034	0.00124621	0.0689261	down	yes
ENSRNOG00000001113	Mmd2	ENSRNOT00000060608	GO:0004672(protein kinase activity);GO:0006468(protein phosphorylation);GO:0016021(integral component of membrane);GO:0019835(cytolysis);GO:0032880(regulation of protein localization);GO:0045666(positive regulation of neuron differentiation);GO:0045860(positive regulation of protein kinase activity);GO:0046579(positive regulation of Ras protein signal transduction);GO:0048471(perinuclear region o…	NA	NA	NA	monocyte to macrophage differentiation factor 2 [Rattus norvegicus]	0.818345	1.90793	6.25531	4.10611	0.263118	-1.92622	0.00126049	0.0693962	down	yes
ENSRNOG00000012067	Fam111a	ENSRNOT00000016152	GO:0000785(chromatin);GO:0005634(nucleus);GO:0005737(cytoplasm);GO:0006260(DNA replication);GO:0045071(negative regulation of viral genome replication)	NA	NA	NA	family with sequence similarity 111, member A [Rattus norvegicus]	0.408337	0.164129	11.1465	0.091222	0.0509415	-4.29501	0.0013232	0.0722107	down	yes
ENSRNOG00000014171	Tnfsf13	ENSRNOT00000056903;ENSRNOT00000090762	GO:0002426(immunoglobulin production in mucosal tissue);GO:0002636(positive regulation of germinal center formation);GO:0003674(molecular_function);GO:0005125(cytokine activity);GO:0005164(tumor necrosis factor receptor binding);GO:0005575(cellular_component);GO:0005615(extracellular space);GO:0005737(cytoplasm);GO:0006955(immune response);GO:0008150(biological_process);GO:0008284(positive regula…	04060(Cytokine-cytokine receptor interaction);04672(Intestinal immune network for IgA production);05323(Rheumatoid arthritis);05323(Rheumatoid arthritis)	K05475	NA	tumor necrosis factor ligand superfamily member 13 [Rattus norvegicus]	2.75675	2.39926	43.3038	1.75441	0.11443	-3.12746	0.00132415	0.0722107	down	yes
ENSRNOG00000001288	Gpr146	ENSRNOT00000001733	GO:0004930(G-protein coupled receptor activity);GO:0007186(G-protein coupled receptor signaling pathway);GO:0016021(integral component of membrane)	04915(Estrogen signaling pathway)	K04246	NA	probable G-protein coupled receptor 146 [Rattus norvegicus]	7.80181	10.4758	20.9166	26.9755	0.381642	-1.38971	0.00132966	0.0722107	down	yes
ENSRNOG00000049075	Fabp5	ENSRNOT00000075493	GO:0005215(transporter activity);GO:0005504(fatty acid binding);GO:0005737(cytoplasm);GO:0006006(glucose metabolic process);GO:0006629(lipid metabolic process);GO:0006656(phosphatidylcholine biosynthetic process);GO:0009611(response to wounding);GO:0015758(glucose transport);GO:0070062(extracellular exosome)	03320(PPAR signaling pathway)	K08754	NA	RecName: Full=Fatty acid-binding protein, epidermal; AltName: Full=Cutaneous fatty acid-binding protein; Short=C-FABP; AltName: Full=DA11; AltName: Full=Epidermal-type fatty acid-binding protein; Short=E-FABP; AltName: Full=Fatty acid-binding protein 5	13.6342	26.5474	49.694	67.5767	0.34264	-1.54524	0.0013421	0.0725582	down	yes
ENSRNOG00000015588	Nol3	ENSRNOT00000020908	GO:0001666(response to hypoxia);GO:0001974(blood vessel remodeling);GO:0002931(response to ischemia);GO:0005102(receptor binding);GO:0005123(death receptor binding);GO:0005509(calcium ion binding);GO:0005515(protein binding);GO:0005730(nucleolus);GO:0005737(cytoplasm);GO:0005739(mitochondrion);GO:0006376(mRNA splice site selection);GO:0006397(mRNA processing);GO:0010468(regulation of gene express…	04621(NOD-like receptor signaling pathway)	K12797	NA	nucleolar protein 3 [Rattus norvegicus]	0.744103	1.08792	0.156685	0.152401	5.92721	2.56735	0.00142955	0.0769392	up	yes
ENSRNOG00000004328	Deptor	ENSRNOT00000005722	GO:0005622(intracellular);GO:0006469(negative regulation of protein kinase activity);GO:0032007(negative regulation of TOR signaling);GO:0035556(intracellular signal transduction);GO:0045792(negative regulation of cell size);GO:2001236(regulation of extrinsic apoptotic signaling pathway)	04261(Adrenergic signaling in cardiomyocytes)	K04351	NA	DEP domain containing 6, partial [Mus musculus]	0.117629	0.301071	1.55673	1.09065	0.158156	-2.66058	0.00145131	0.07745	down	yes
ENSRNOG00000045829	Thbs1	ENSRNOT00000070912;ENSRNOT00000083351	GO:0000187(activation of MAPK activity);GO:0001786(phosphatidylserine binding);GO:0001937(negative regulation of endothelial cell proliferation);GO:0001953(negative regulation of cell-matrix adhesion);GO:0001968(fibronectin binding);GO:0002040(sprouting angiogenesis);GO:0002544(chronic inflammatory response);GO:0002581(negative regulation of antigen processing and presentation of peptide or polys…	04015(Rap1 signaling pathway);04350(TGF-beta signaling pathway);04151(PI3K-Akt signaling pathway);04512(ECM-receptor interaction);04145(Phagosome);04115(p53 signaling pathway);04510(Focal adhesion);05206(MicroRNAs in cancer);05205(Proteoglycans in cancer);05219(Bladder cancer);05144(Malaria);05144(Malaria)	K16857	NA	thrombospondin-1 precursor [Rattus norvegicus]	0.824535	0.461587	1.75968	2.75595	0.284816	-1.8119	0.00145195	0.07745	down	yes
ENSRNOG00000010296	Slc7a7	ENSRNOT00000014391	GO:0000821(regulation of arginine metabolic process);GO:0003674(molecular_function);GO:0005575(cellular_component);GO:0005887(integral component of plasma membrane);GO:0008150(biological_process);GO:0015174(basic amino acid transmembrane transporter activity);GO:0015179(L-amino acid transmembrane transporter activity);GO:0015297(antiporter activity);GO:0016323(basolateral plasma membrane);GO:1902…	04974(Protein digestion and absorption)	K13867	NA	Y+L amino acid transporter 1 [Rattus norvegicus]	29.15	13.3269	9.08569	3.49611	3.37606	1.75534	0.00148423	0.0788216	up	yes
ENSRNOG00000011875	Slc2a2	ENSRNOT00000015866;ENSRNOT00000091221	GO:0005158(insulin receptor binding);GO:0005355(glucose transmembrane transporter activity);GO:0005737(cytoplasm);GO:0005768(endosome);GO:0005829(cytosol);GO:0005886(plasma membrane);GO:0005903(brush border);GO:0005911(cell-cell junction);GO:0009749(response to glucose);GO:0009758(carbohydrate utilization);GO:0015755(fructose transport);GO:0015758(glucose transport);GO:0016021(integral component …	04911(Insulin secretion);04922(Glucagon signaling pathway);04917(Prolactin signaling pathway);04973(Carbohydrate digestion and absorption);05230(Central carbon metabolism in cancer);04930(Type II diabetes mellitus);04950(Maturity onset diabetes of the young);04931(Insulin resistance);04931(Insulin resistance)	K07593	NA	solute carrier family 2, facilitated glucose transporter member 2 [Rattus norvegicus]	31.6465	27.6679	68.9507	79.4069	0.399807	-1.32263	0.00149957	0.0792855	down	yes
ENSRNOG00000005464	Lgalsl	ENSRNOT00000008274	GO:0005622(intracellular);GO:0030246(carbohydrate binding)	NA	NA	NA	RIKEN cDNA 1110067D22, isoform CRA_a, partial [Mus musculus]	6.06848	5.51625	1.59961	2.73536	2.67239	1.41813	0.00154695	0.0814318	up	yes
ENSRNOG00000058123	AABR07035780.2	ENSRNOT00000082092;ENSRNOT00000092040	GO:2000359(regulation of binding of sperm to zona pellucida);GO:2000359(regulation of binding of sperm to zona pellucida)	NA	NA	NA	PREDICTED: zonadhesin isoform X2 [Rattus norvegicus]	7.81527	6.66509	2.29298	3.2781	2.5992	1.37807	0.00167171	0.0876153	up	yes
ENSRNOG00000051922	AABR07059663.1	ENSRNOT00000077134	GO:0005737(cytoplasm);GO:0043231(intracellular membrane-bounded organelle)	NA	NA	NA	PREDICTED: LOW QUALITY PROTEIN: sterile alpha motif domain-containing protein 9-like isoform X2 [Rattus norvegicus]	11.4794	2.35955	1.5804	2.08994	3.7705	1.91476	0.00171349	0.0894141	up	yes
ENSRNOG00000017414	Irf7	ENSRNOT00000023504	GO:0000979(RNA polymerase II core promoter sequence-specific DNA binding);GO:0000982(transcription factor activity, RNA polymerase II core promoter proximal region sequence-specific binding);GO:0002819(regulation of adaptive immune response);GO:0005654(nucleoplasm);GO:0005737(cytoplasm);GO:0016064(immunoglobulin mediated immune response);GO:0032607(interferon-alpha production);GO:0032608(interfer…	04620(Toll-like receptor signaling pathway);04622(RIG-I-like receptor signaling pathway);04623(Cytosolic DNA-sensing pathway);05203(Viral carcinogenesis);05162(Measles);05164(Influenza A);05161(Hepatitis B);05160(Hepatitis C);05168(Herpes simplex infection)	K09447	NA	interferon regulatory factor 7 [Rattus norvegicus]	201.343	9.24282	10.5056	16.8635	7.69429	2.94379	0.00173638	0.0901994	up	yes
ENSRNOG00000033220	Oas1b	ENSRNOT00000001853;ENSRNOT00000081108;ENSRNOT00000075234;ENSRNOT00000088023;ENSRNOT00000048782	GO:0001730(2'-5'-oligoadenylate synthetase activity);GO:0003725(double-stranded RNA binding);GO:0005524(ATP binding);GO:0005789(endoplasmic reticulum membrane);GO:0006955(immune response);GO:0009615(response to virus);GO:0016021(integral component of membrane);GO:0016779(nucleotidyltransferase activity);GO:0045071(negative regulation of viral genome replication);GO:0045087(innate immune response)…	05162(Measles);05164(Influenza A);05160(Hepatitis C);05168(Herpes simplex infection);05168(Herpes simplex infection)	K14216	EC:2.7.7.84	2 ' -5 ' oligoadenylate synthetase 1K [Rattus norvegicus]	9.86523	1.12729	0.39856	1.4418	5.97302	2.57846	0.00174406	0.0901994	up	yes
ENSRNOG00000026293	Jun	ENSRNOT00000011731	GO:0000122(negative regulation of transcription from RNA polymerase II promoter);GO:0000790(nuclear chromatin);GO:0000978(RNA polymerase II core promoter proximal region sequence-specific DNA binding);GO:0000980(RNA polymerase II distal enhancer sequence-specific DNA binding);GO:0000982(transcription factor activity, RNA polymerase II core promoter proximal region sequence-specific binding);GO:00…	04010(MAPK signaling pathway);04012(ErbB signaling pathway);04310(Wnt signaling pathway);04668(TNF signaling pathway);04024(cAMP signaling pathway);04210(Apoptosis);04510(Focal adhesion);04620(Toll-like receptor signaling pathway);04660(T cell receptor signaling pathway);04662(B cell receptor signaling pathway);04912(GnRH signaling pathway);04915(Estrogen signaling pathway);04921(Oxytocin signali…	K04448	NA	transcription factor AP-1 [Rattus norvegicus]	88.9199	122.889	47.018	33.9768	2.61509	1.38686	0.00175108	0.0901994	up	yes
ENSRNOG00000013000	Ldhb	ENSRNOT00000017965	GO:0004457(lactate dehydrogenase activity);GO:0004459(L-lactate dehydrogenase activity);GO:0005515(protein binding);GO:0005737(cytoplasm);GO:0005739(mitochondrion);GO:0005975(carbohydrate metabolic process);GO:0006089(lactate metabolic process);GO:0016020(membrane);GO:0019674(NAD metabolic process);GO:0019900(kinase binding);GO:0042802(identical protein binding);GO:0043209(myelin sheath);GO:00451…	00010(Glycolysis / Gluconeogenesis);00620(Pyruvate metabolism);00640(Propanoate metabolism);00270(Cysteine and methionine metabolism);04922(Glucagon signaling pathway)	K00016	EC:1.1.1.27	L-lactate dehydrogenase B chain isoform Ldhbx [Rattus norvegicus]	1.2588	1.03479	5.66674	3.05546	0.262959	-1.92709	0.00182503	0.0932143	down	yes
ENSRNOG00000000167	Alas2	ENSRNOT00000000180	GO:0001666(response to hypoxia);GO:0003870(5-aminolevulinate synthase activity);GO:0005739(mitochondrion);GO:0005743(mitochondrial inner membrane);GO:0005759(mitochondrial matrix);GO:0006782(protoporphyrinogen IX biosynthetic process);GO:0006783(heme biosynthetic process);GO:0006879(cellular iron ion homeostasis);GO:0007595(lactation);GO:0010288(response to lead ion);GO:0016594(glycine binding);G…	00260(Glycine, serine and threonine metabolism);00860(Porphyrin and chlorophyll metabolism)	K00643	EC:2.3.1.37	Aminolevulinate, delta-, synthase 2 [Rattus norvegicus]	0.712681	0.447182	3.12438	1.84531	0.233387	-2.0992	0.00182514	0.0932143	down	yes
ENSRNOG00000000521	Cdkn1a	ENSRNOT00000000628;ENSRNOT00000091731	GO:0000079(regulation of cyclin-dependent protein serine/threonine kinase activity);GO:0000082(G1/S transition of mitotic cell cycle);GO:0000086(G2/M transition of mitotic cell cycle);GO:0000307(cyclin-dependent protein kinase holoenzyme complex);GO:0004861(cyclin-dependent protein serine/threonine kinase inhibitor activity);GO:0005515(protein binding);GO:0005634(nucleus);GO:0005737(cytoplasm);GO…	04012(ErbB signaling pathway);04630(Jak-STAT signaling pathway);04066(HIF-1 signaling pathway);04068(FoxO signaling pathway);04151(PI3K-Akt signaling pathway);04110(Cell cycle);04115(p53 signaling pathway);04921(Oxytocin signaling pathway);05200(Pathways in cancer);05202(Transcriptional misregulation in cancers);05206(MicroRNAs in cancer);05205(Proteoglycans in cancer);05203(Viral carcinogenesis)…	K06625	NA	cyclin-dependent kinase inhibitor 1 [Rattus norvegicus]	25.7156	10.2604	0.671227	6.23615	5.20834	2.38082	0.00185804	0.0944921	up	yes
ENSRNOG00000054978	Hist1h1c	ENSRNOT00000087731	GO:0000122(negative regulation of transcription from RNA polymerase II promoter);GO:0000786(nucleosome);GO:0003677(DNA binding);GO:0005634(nucleus);GO:0005719(nuclear euchromatin);GO:0006334(nucleosome assembly);GO:0006357(regulation of transcription from RNA polymerase II promoter);GO:0016584(nucleosome positioning);GO:0031490(chromatin DNA binding);GO:0035327(transcriptionally active chromatin)…	05203(Viral carcinogenesis);05322(Systemic lupus erythematosus);05034(Alcoholism)	K11254	NA	PREDICTED: histone H1.2 [Rattus norvegicus]	98.0702	147.556	53.4813	13.6883	3.6568	1.87058	0.00186864	0.0945335	up	yes
ENSRNOG00000018198	Dapk1	ENSRNOT00000080750;ENSRNOT00000066950	GO:0004672(protein kinase activity);GO:0004683(calmodulin-dependent protein kinase activity);GO:0005516(calmodulin binding);GO:0005524(ATP binding);GO:0005737(cytoplasm);GO:0005886(plasma membrane);GO:0006468(protein phosphorylation);GO:0006915(apoptotic process);GO:0007165(signal transduction);GO:0008625(extrinsic apoptotic signaling pathway via death domain receptors);GO:0015629(actin cytoskele…	05200(Pathways in cancer);05219(Bladder cancer);05219(Bladder cancer)	K08803	EC:2.7.11.1	PREDICTED: death-associated protein kinase 1 isoform X1 [Rattus norvegicus]	5.81481	8.60145	2.23137	3.50249	2.51424	1.33012	0.00187891	0.0945335	up	yes
ENSRNOG00000008144	Irf1	ENSRNOT00000010968	GO:0000790(nuclear chromatin);GO:0000975(regulatory region DNA binding);GO:0000978(RNA polymerase II core promoter proximal region sequence-specific DNA binding);GO:0001077(transcriptional activator activity, RNA polymerase II core promoter proximal region sequence-specific binding);GO:0003677(DNA binding);GO:0003700(transcription factor activity, sequence-specific DNA binding);GO:0005515(protein…	04917(Prolactin signaling pathway);05133(Pertussis);05160(Hepatitis C)	K09444	NA	interferon regulatory factor 1, isoform CRA_c [Rattus norvegicus]	34.4089	19.6005	11.6156	9.73474	2.52967	1.33895	0.00188248	0.0945335	up	yes
ENSRNOG00000010224	Rab30	ENSRNOT00000092066;ENSRNOT00000013851	GO:0005525(GTP binding);GO:0005801(cis-Golgi network);GO:0005802(trans-Golgi network);GO:0007030(Golgi organization);GO:0007264(small GTPase mediated signal transduction);GO:0016020(membrane);GO:0031985(Golgi cisterna);GO:0031985(Golgi cisterna)	04144(Endocytosis);05134(Legionellosis);05134(Legionellosis)	K07903;K07874	NA	ras-related protein Rab-30 [Rattus norvegicus]	9.40836	6.69458	17.1004	22.7412	0.404174	-1.30695	0.00191263	0.095512	down	yes
ENSRNOG00000014532	Lbp	ENSRNOT00000019787	GO:0001530(lipopolysaccharide binding);GO:0001889(liver development);GO:0002232(leukocyte chemotaxis involved in inflammatory response);GO:0002281(macrophage activation involved in immune response);GO:0005102(receptor binding);GO:0005615(extracellular space);GO:0006869(lipid transport);GO:0006953(acute-phase response);GO:0009986(cell surface);GO:0015920(lipopolysaccharide transport);GO:0016020(me…	04064(NF-kappa B signaling pathway);04620(Toll-like receptor signaling pathway);05132(Salmonella infection);05152(Tuberculosis)	K05399	NA	lipopolysaccharide-binding protein precursor [Rattus norvegicus]	181.456	44.1317	37.9945	23.081	3.69359	1.88502	0.00191788	0.095512	up	yes
ENSRNOG00000010625	Dnmt3b	ENSRNOT00000015482;ENSRNOT00000090321	GO:0000122(negative regulation of transcription from RNA polymerase II promoter);GO:0000775(chromosome, centromeric region);GO:0000792(heterochromatin);GO:0001666(response to hypoxia);GO:0003677(DNA binding);GO:0003682(chromatin binding);GO:0003714(transcription corepressor activity);GO:0003886(DNA (cytosine-5-)-methyltransferase activity);GO:0005515(protein binding);GO:0005634(nucleus);GO:000565…	00270(Cysteine and methionine metabolism);05206(MicroRNAs in cancer);05206(MicroRNAs in cancer)	K17399	EC:2.1.1.37	DNA (cytosine-5)-methyltransferase 3B [Rattus norvegicus]	2.70457	2.97206	1.0363	0.863505	2.988	1.57918	0.00195931	0.0971723	up	yes
ENSRNOG00000011599	Gldc	ENSRNOT00000067612;ENSRNOT00000089073	GO:0004375(glycine dehydrogenase (decarboxylating) activity);GO:0005634(nucleus);GO:0005739(mitochondrion);GO:0005829(cytosol);GO:0005886(plasma membrane);GO:0005960(glycine cleavage complex);GO:0016594(glycine binding);GO:0016829(lyase activity);GO:0019464(glycine decarboxylation via glycine cleavage system);GO:0019899(enzyme binding);GO:0030170(pyridoxal phosphate binding);GO:0046983(protein di…	01200(Carbon metabolism);00630(Glyoxylate and dicarboxylate metabolism);00260(Glycine, serine and threonine metabolism);00260(Glycine, serine and threonine metabolism)	K00281	EC:1.4.4.2	PREDICTED: glycine dehydrogenase (decarboxylating), mitochondrial isoform X1 [Rattus norvegicus]	17.6377	32.2122	11.1705	6.46552	2.8266	1.49907	0.00203884	0.100382	up	yes
ENSRNOG00000038370	AABR07034632.1	ENSRNOT00000058422;ENSRNOT00000078203	GO:0001503(ossification);GO:0004866(endopeptidase inhibitor activity);GO:0004869(cysteine-type endopeptidase inhibitor activity);GO:0005615(extracellular space);GO:0006461(protein complex assembly);GO:0006953(acute-phase response);GO:0008584(male gonad development);GO:0010951(negative regulation of endopeptidase activity);GO:0016021(integral component of membrane);GO:0019210(kinase inhibitor acti…	NA	NA	NA	RecName: Full=Alpha-2-HS-glycoprotein; AltName: Full=59 kDa bone sialic acid-containing protein; Short=BSP; AltName: Full=Fetuin-A; AltName: Full=Glycoprotein PP63; Flags: Precursor	1203.68	1136.08	3128.58	2730.48	0.399341	-1.32431	0.00204075	0.100382	down	yes
ENSRNOG00000036318	AC119336.1	ENSRNOT00000054440	GO:0005737(cytoplasm);GO:0006879(cellular iron ion homeostasis);GO:0007605(sensory perception of sound);GO:0008199(ferric iron binding);GO:0016324(apical plasma membrane);GO:0048741(skeletal muscle fiber development);GO:0060171(stereocilium membrane)	04978(Mineral absorption)	K13625	NA	protein FAM65B [Rattus norvegicus]	1.92232	27.9045	42.3418	260.501	0.0984895	-3.34389	0.00205152	0.1005	down	yes
ENSRNOG00000004100	Trib1	ENSRNOT00000005885	GO:0004672(protein kinase activity);GO:0004860(protein kinase inhibitor activity);GO:0005524(ATP binding);GO:0005634(nucleus);GO:0005737(cytoplasm);GO:0006469(negative regulation of protein kinase activity);GO:0007254(JNK cascade);GO:0008134(transcription factor binding);GO:0014912(negative regulation of smooth muscle cell migration);GO:0031434(mitogen-activated protein kinase kinase binding);GO:…	04931(Insulin resistance)	K19518	NA	tribbles homolog 1 [Rattus norvegicus]	4.54687	2.90654	9.74255	9.81502	0.381101	-1.39175	0.00206196	0.1006	down	yes
ENSRNOG00000019704	Resp18	ENSRNOT00000026753;ENSRNOT00000089555	GO:0001701(in utero embryonic development);GO:0003674(molecular_function);GO:0005576(extracellular region);GO:0005783(endoplasmic reticulum);GO:0005794(Golgi apparatus);GO:0008150(biological_process);GO:0030141(secretory granule);GO:0043204(perikaryon);GO:0048237(rough endoplasmic reticulum lumen);GO:0048237(rough endoplasmic reticulum lumen)	04940(Type I diabetes mellitus);04940(Type I diabetes mellitus)	K07817	EC:3.1.3.48	regulated endocrine-specific protein 18 precursor [Rattus norvegicus]	23.9139	8.36924	0.611327	5.16714	5.58681	2.48202	0.00207951	0.101045	up	yes
ENSRNOG00000053891	AABR07018078.1	ENSRNOT00000074738	GO:0005634(nucleus);GO:0006351(transcription, DNA-templated);GO:0006355(regulation of transcription, DNA-templated);GO:0008270(zinc ion binding)	00310(Lysine degradation)	K18494	EC:2.1.1.43	PHD finger protein 11 [Rattus norvegicus]	60.3808	19.7097	10.1038	16.3281	3.03006	1.59935	0.00209978	0.101595	up	yes
ENSRNOG00000010438	Cpt1b	ENSRNOT00000013985	GO:0004095(carnitine O-palmitoyltransferase activity);GO:0005515(protein binding);GO:0005739(mitochondrion);GO:0005741(mitochondrial outer membrane);GO:0006635(fatty acid beta-oxidation);GO:0015909(long-chain fatty acid transport);GO:0016021(integral component of membrane);GO:0043231(intracellular membrane-bounded organelle)	01212(Fatty acid metabolism);00071(Fatty acid degradation);04152(AMPK signaling pathway);04922(Glucagon signaling pathway);04920(Adipocytokine signaling pathway);03320(PPAR signaling pathway);04931(Insulin resistance)	K19523	EC:2.3.1.21	RecName: Full=Carnitine O-palmitoyltransferase 1, muscle isoform; Short=CPT1-M; AltName: Full=Carnitine O-palmitoyltransferase I, muscle isoform; Short=CPT I; Short=CPTI-M; AltName: Full=Carnitine palmitoyltransferase 1B; AltName: Full=Carnitine palmitoyltransferase I-like protein	4.21907	4.40718	1.37402	1.9139	2.62362	1.39156	0.00210773	0.101595	up	yes
ENSRNOG00000048924	Islr	ENSRNOT00000075476	GO:0070062(extracellular exosome)	NA	NA	NA	immunoglobulin superfamily containing leucine-rich repeat protein precursor [Rattus norvegicus]	1.44139	1.85476	6.41402	3.91362	0.319158	-1.64766	0.00219659	0.105454	down	yes
ENSRNOG00000028891	Cyp2t1	ENSRNOT00000068322;ENSRNOT00000079995	GO:0004497(monooxygenase activity);GO:0005506(iron ion binding);GO:0008392(arachidonic acid epoxygenase activity);GO:0008395(steroid hydroxylase activity);GO:0016705(oxidoreductase activity, acting on paired donors, with incorporation or reduction of molecular oxygen);GO:0019373(epoxygenase P450 pathway);GO:0019825(oxygen binding);GO:0020037(heme binding);GO:0055114(oxidation-reduction process);G…	00980(Metabolism of xenobiotics by cytochrome P450);00980(Metabolism of xenobiotics by cytochrome P450)	K07416	EC:1.14.14.1	cytochrome P450, family 2, subfamily t, polypeptide 1 precursor [Rattus norvegicus]	17.0468	23.8229	50.8706	52.4836	0.395434	-1.33849	0.00222296	0.106295	down	yes
ENSRNOG00000032959	Adh7	ENSRNOT00000015870	GO:0001523(retinoid metabolic process);GO:0004022(alcohol dehydrogenase (NAD) activity);GO:0004024(alcohol dehydrogenase activity, zinc-dependent);GO:0004031(aldehyde oxidase activity);GO:0004745(retinol dehydrogenase activity);GO:0005576(extracellular region);GO:0005622(intracellular);GO:0005737(cytoplasm);GO:0006067(ethanol metabolic process);GO:0006068(ethanol catabolic process);GO:0006069(eth…	00010(Glycolysis / Gluconeogenesis);00071(Fatty acid degradation);00350(Tyrosine metabolism);00830(Retinol metabolism);00980(Metabolism of xenobiotics by cytochrome P450);00982(Drug metabolism - cytochrome P450);05204(Chemical carcinogenesis)	K13951	EC:1.1.1.1	PREDICTED: alcohol dehydrogenase class 4 mu/sigma chain isoform X1 [Rattus norvegicus]	12.3941	10.7018	5.60186	2.54091	2.83636	1.50404	0.0022644	0.107847	up	yes
ENSRNOG00000045686	Nfs1	ENSRNOT00000072945	GO:0005634(nucleus);GO:0005654(nucleoplasm);GO:0005730(nucleolus);GO:0005737(cytoplasm);GO:0005739(mitochondrion);GO:0005759(mitochondrial matrix);GO:0005829(cytosol);GO:0006777(Mo-molybdopterin cofactor biosynthetic process);GO:0018283(iron incorporation into metallo-sulfur cluster);GO:0030170(pyridoxal phosphate binding);GO:0031071(cysteine desulfurase activity);GO:0042803(protein homodimerizat…	00730(Thiamine metabolism);04122(Sulfur relay system)	K04487	EC:2.8.1.7	cysteine desulfurase, mitochondrial [Rattus norvegicus]	2.70897	23.1444	3.17677	2.03796	4.95776	2.30969	0.00236882	0.112374	up	yes
ENSRNOG00000011039	Gch1	ENSRNOT00000014821	GO:0003934(GTP cyclohydrolase I activity);GO:0005509(calcium ion binding);GO:0005515(protein binding);GO:0005525(GTP binding);GO:0005634(nucleus);GO:0005654(nucleoplasm);GO:0005737(cytoplasm);GO:0005829(cytosol);GO:0006461(protein complex assembly);GO:0006729(tetrahydrobiopterin biosynthetic process);GO:0008217(regulation of blood pressure);GO:0008270(zinc ion binding);GO:0014916(regulation of lu…	00790(Folate biosynthesis)	K01495	EC:3.5.4.16	GTP cyclohydrolase 1 precursor [Rattus norvegicus]	11.0457	9.85467	26.1689	23.4869	0.420905	-1.24843	0.00240992	0.113873	down	yes
ENSRNOG00000017558	Tubb2a	ENSRNOT00000086264;ENSRNOT00000023611	GO:0003924(GTPase activity);GO:0005200(structural constituent of cytoskeleton);GO:0005525(GTP binding);GO:0005634(nucleus);GO:0005737(cytoplasm);GO:0005874(microtubule);GO:0007017(microtubule-based process);GO:0070062(extracellular exosome);GO:0070062(extracellular exosome)	04145(Phagosome);04540(Gap junction);05130(Pathogenic Escherichia coli infection);05130(Pathogenic Escherichia coli infection)	K07375	NA	tubulin beta-2A chain isoform 1 [Homo sapiens]	34.6149	25.0518	6.71442	15.9373	2.6341	1.39731	0.00249555	0.117457	up	yes
ENSRNOG00000016987	Pstpip2	ENSRNOT00000022833	GO:0003779(actin binding);GO:0005829(cytosol);GO:0005856(cytoskeleton);GO:0007010(cytoskeleton organization);GO:0016020(membrane);GO:0016477(cell migration)	04621(NOD-like receptor signaling pathway)	K12804	NA	proline-serine-threonine phosphatase-interacting protein 2 [Rattus norvegicus]	4.53738	5.38315	10.6762	13.258	0.414491	-1.27059	0.00252047	0.117854	down	yes
ENSRNOG00000015061	Igfals	ENSRNOT00000020233	GO:0005520(insulin-like growth factor binding);GO:0005654(nucleoplasm);GO:0007155(cell adhesion);GO:0007165(signal transduction);GO:0007568(aging);GO:0008022(protein C-terminus binding);GO:0042567(insulin-like growth factor ternary complex);GO:0043231(intracellular membrane-bounded organelle);GO:0070062(extracellular exosome)	NA	NA	NA	mKIAA4111 protein, partial [Mus musculus]	62.1438	56.9743	175.528	122.891	0.399163	-1.32495	0.00252362	0.117854	down	yes
ENSRNOG00000002141	Cd200	ENSRNOT00000058453;ENSRNOT00000093212	GO:0004872(receptor activity);GO:0005102(receptor binding);GO:0005887(integral component of plasma membrane);GO:0005913(cell-cell adherens junction);GO:0007156(homophilic cell adhesion via plasma membrane adhesion molecules);GO:0007157(heterophilic cell-cell adhesion via plasma membrane cell adhesion molecules);GO:0008037(cell recognition);GO:0016021(integral component of membrane);GO:0042803(pro…	NA	NA	NA	PREDICTED: OX-2 membrane glycoprotein isoform X1 [Rattus norvegicus]	1.00945	1.32977	0.212456	0.333409	4.28533	2.09941	0.00254878	0.118567	up	yes
ENSRNOG00000001809	LOC681544	ENSRNOT00000047595;ENSRNOT00000081864	GO:0002839(positive regulation of immune response to tumor cell);GO:0003674(molecular_function);GO:0004867(serine-type endopeptidase inhibitor activity);GO:0004869(cysteine-type endopeptidase inhibitor activity);GO:0005102(receptor binding);GO:0005575(cellular_component);GO:0005576(extracellular region);GO:0007162(negative regulation of cell adhesion);GO:0008150(biological_process);GO:0008201(hep…	NA	NA	NA	histidine-rich glycoprotein precursor [Rattus norvegicus]	3174.74	1582.49	928.703	894.524	2.60923	1.38363	0.00258382	0.119623	up	yes
ENSRNOG00000057092	Slfn4	ENSRNOT00000078046;ENSRNOT00000078946;ENSRNOT00000079325	GO:0005524(ATP binding);GO:0016021(integral component of membrane);GO:0048286(lung alveolus development);GO:0048286(lung alveolus development)	NA	NA	NA	PREDICTED: schlafen 4 isoform X2 [Rattus norvegicus]	129.317	31.1478	12.9184	30.6556	3.68258	1.88072	0.00259139	0.119623	up	yes
ENSRNOG00000019413	Atg16l2	ENSRNOT00000026286	GO:0000045(autophagosome assembly);GO:0000421(autophagosome membrane);GO:0003674(molecular_function);GO:0005575(cellular_component);GO:0005654(nucleoplasm);GO:0008150(biological_process);GO:0039689(negative stranded viral RNA replication)	04140(Regulation of autophagy)	K17890	NA	autophagy-related protein 16-2 [Rattus norvegicus]	17.0752	26.3393	7.53304	10.4206	2.41814	1.2739	0.00263317	0.121086	up	yes
ENSRNOG00000012184	Urgcp	ENSRNOT00000076874;ENSRNOT00000016468;ENSRNOT00000076811;ENSRNOT00000076740	GO:0005525(GTP binding);GO:0005525(GTP binding)	04621(NOD-like receptor signaling pathway);04621(NOD-like receptor signaling pathway)	K12797	NA	up-regulated gene 4 [Rattus norvegicus]	10.6453	8.46892	1.96728	5.20169	2.66625	1.41481	0.00265516	0.121631	up	yes
ENSRNOG00000018526	Dlg4	ENSRNOT00000068493;ENSRNOT00000089108	GO:0002091(negative regulation of receptor internalization);GO:0004385(guanylate kinase activity);GO:0005102(receptor binding);GO:0005515(protein binding);GO:0005737(cytoplasm);GO:0005783(endoplasmic reticulum);GO:0005886(plasma membrane);GO:0006461(protein complex assembly);GO:0007204(positive regulation of cytosolic calcium ion concentration);GO:0008021(synaptic vesicle);GO:0008022(protein C-te…	04390(Hippo signaling pathway);04724(Glutamatergic synapse);05016(Huntington's disease);05030(Cocaine addiction);05030(Cocaine addiction)	K11828	NA	disks large homolog 4 [Rattus norvegicus]	0.559215	0.82216	8.87423	0.585122	0.146033	-2.77564	0.0027143	0.123867	down	yes
ENSRNOG00000027949	Rfx6	ENSRNOT00000030642	GO:0000977(RNA polymerase II regulatory region sequence-specific DNA binding);GO:0000978(RNA polymerase II core promoter proximal region sequence-specific DNA binding);GO:0001228(transcriptional activator activity, RNA polymerase II transcription regulatory region sequence-specific binding);GO:0003309(type B pancreatic cell differentiation);GO:0003310(pancreatic A cell differentiation);GO:0003311…	04950(Maturity onset diabetes of the young)	K19521	NA	DNA-binding protein RFX6 [Rattus norvegicus]	2.07826	2.37407	0.521203	0.904709	3.12245	1.64268	0.0028842	0.129925	up	yes
ENSRNOG00000019542	MGC108823	ENSRNOT00000050063	GO:0005525(GTP binding);GO:0016020(membrane)	04668(TNF signaling pathway)	K17072	NA	uncharacterized protein LOC307414 [Rattus norvegicus]	19.313	6.98286	5.18244	1.4726	3.95126	1.98231	0.00288501	0.129925	up	yes
ENSRNOG00000012458	Cyp2e1	ENSRNOT00000016883;ENSRNOT00000078080	GO:0000139(Golgi membrane);GO:0004497(monooxygenase activity);GO:0005506(iron ion binding);GO:0005739(mitochondrion);GO:0005783(endoplasmic reticulum);GO:0006641(triglyceride metabolic process);GO:0006805(xenobiotic metabolic process);GO:0008202(steroid metabolic process);GO:0008392(arachidonic acid epoxygenase activity);GO:0008395(steroid hydroxylase activity);GO:0010181(FMN binding);GO:0010193(…	00140(Steroid hormone biosynthesis);00590(Arachidonic acid metabolism);00591(Linoleic acid metabolism);00980(Metabolism of xenobiotics by cytochrome P450);00982(Drug metabolism - cytochrome P450);05204(Chemical carcinogenesis);04932(Non-alcoholic fatty liver disease (NAFLD));04932(Non-alcoholic fatty liver disease (NAFLD))	K07415	EC:1.14.13.-	RecName: Full=Cytochrome P450 2E1; AltName: Full=4-nitrophenol 2-hydroxylase; AltName: Full=CYPIIE1; AltName: Full=Cytochrome P450-J; AltName: Full=Cytochrome P450RLM6	533.584	516.197	1417.75	1146.46	0.409397	-1.28843	0.00288586	0.129925	down	yes
ENSRNOG00000021750	Id1	ENSRNOT00000029660	GO:0000122(negative regulation of transcription from RNA polymerase II promoter);GO:0001886(endothelial cell morphogenesis);GO:0003700(transcription factor activity, sequence-specific DNA binding);GO:0005515(protein binding);GO:0005634(nucleus);GO:0005654(nucleoplasm);GO:0005737(cytoplasm);GO:0005794(Golgi apparatus);GO:0005813(centrosome);GO:0006351(transcription, DNA-templated);GO:0007420(brain…	04015(Rap1 signaling pathway);04350(TGF-beta signaling pathway);04390(Hippo signaling pathway);04550(Signaling pathways regulating pluripotency of stem cells)	K04680	NA	helix-loop-helix protein (Id), partial [Mus musculus]	57.7235	13.8583	9.33747	12.5277	3.27378	1.71096	0.00289035	0.129925	up	yes
ENSRNOG00000018522	LOC100911186	ENSRNOT00000025446	GO:0005759(mitochondrial matrix);GO:0006635(fatty acid beta-oxidation)	01200(Carbon metabolism);01212(Fatty acid metabolism);00640(Propanoate metabolism);00650(Butanoate metabolism);00062(Fatty acid elongation);00071(Fatty acid degradation);00280(Valine, leucine and isoleucine degradation);00310(Lysine degradation);00380(Tryptophan metabolism);00410(beta-Alanine metabolism)	K07511	EC:4.2.1.17	enoyl-CoA hydratase, mitochondrial precursor [Rattus norvegicus]	12.9939	10.52	34.6129	22.5276	0.411511	-1.281	0.0029402	0.131397	down	yes
ENSRNOG00000004626	Slc34a2	ENSRNOT00000048509	GO:0001701(in utero embryonic development);GO:0005315(inorganic phosphate transmembrane transporter activity);GO:0005436(sodium:phosphate symporter activity);GO:0005737(cytoplasm);GO:0005903(brush border);GO:0006817(phosphate ion transport);GO:0007568(aging);GO:0009750(response to fructose);GO:0015321(sodium-dependent phosphate transmembrane transporter activity);GO:0016021(integral component of …	04978(Mineral absorption)	K14683	NA	sodium-dependent phosphate transport protein 2B [Rattus norvegicus]	7.26562	4.5108	1.70611	3.00805	2.4981	1.32083	0.00294498	0.131397	up	yes
ENSRNOG00000009715	Me1	ENSRNOT00000013244;ENSRNOT00000078977	GO:0004470(malic enzyme activity);GO:0004471(malate dehydrogenase (decarboxylating) (NAD+) activity);GO:0004473(malate dehydrogenase (decarboxylating) (NADP+) activity);GO:0005739(mitochondrion);GO:0005829(cytosol);GO:0006108(malate metabolic process);GO:0008948(oxaloacetate decarboxylase activity);GO:0009725(response to hormone);GO:0030145(manganese ion binding);GO:0046872(metal ion binding);GO:…	01200(Carbon metabolism);00620(Pyruvate metabolism);03320(PPAR signaling pathway);03320(PPAR signaling pathway)	K00029	EC:1.1.1.40	NADP-dependent malic enzyme [Rattus norvegicus]	4.07593	4.58653	8.61123	12.0884	0.418483	-1.25676	0.00296939	0.131995	down	yes
ENSRNOG00000007332	Sstr3	ENSRNOT00000009612	GO:0004930(G-protein coupled receptor activity);GO:0004994(somatostatin receptor activity);GO:0005102(receptor binding);GO:0005737(cytoplasm);GO:0005886(plasma membrane);GO:0005887(integral component of plasma membrane);GO:0005929(cilium);GO:0007187(G-protein coupled receptor signaling pathway, coupled to cyclic nucleotide second messenger);GO:0007218(neuropeptide signaling pathway);GO:0007268(ch…	04080(Neuroactive ligand-receptor interaction)	K04219	NA	somatostatin receptor type 3 [Rattus norvegicus]	0.520453	5.33062	0.400169	0.653284	5.55419	2.47358	0.00299872	0.132807	up	yes
ENSRNOG00000017720	Mxd1	ENSRNOT00000023856	GO:0000122(negative regulation of transcription from RNA polymerase II promoter);GO:0000790(nuclear chromatin);GO:0000978(RNA polymerase II core promoter proximal region sequence-specific DNA binding);GO:0001078(transcriptional repressor activity, RNA polymerase II core promoter proximal region sequence-specific binding);GO:0046983(protein dimerization activity)	NA	NA	NA	max dimerization protein 1 [Rattus norvegicus]	10.874	8.71996	3.95754	4.6884	2.26626	1.18031	0.00306612	0.135019	up	yes
ENSRNOG00000005341	Upp2	ENSRNOT00000035158	GO:0004850(uridine phosphorylase activity);GO:0005737(cytoplasm);GO:0009166(nucleotide catabolic process);GO:0044206(UMP salvage);GO:0045098(type III intermediate filament)	00240(Pyrimidine metabolism);00983(Drug metabolism - other enzymes)	K00757	EC:2.4.2.3	uridine phosphorylase 2 [Rattus norvegicus]	7.6455	2.66043	21.1303	10.1702	0.329257	-1.60271	0.00308255	0.135019	down	yes
ENSRNOG00000003634	Zfp354a	ENSRNOT00000045596;ENSRNOT00000085203	GO:0000122(negative regulation of transcription from RNA polymerase II promoter);GO:0001666(response to hypoxia);GO:0001822(kidney development);GO:0003676(nucleic acid binding);GO:0003677(DNA binding);GO:0003700(transcription factor activity, sequence-specific DNA binding);GO:0005622(intracellular);GO:0005634(nucleus);GO:0005730(nucleolus);GO:0006351(transcription, DNA-templated);GO:0006355(regul…	04722(Neurotrophin signaling pathway);04722(Neurotrophin signaling pathway)	K12458	NA	zinc finger protein 354A [Rattus norvegicus]	1.68914	0.833844	0.863074	16.9186	0.141887	-2.81719	0.00309548	0.135019	down	yes
ENSRNOG00000060052	Tdrd15	ENSRNOT00000083144	GO:0005737(cytoplasm);GO:0007275(multicellular organism development);GO:0007283(spermatogenesis);GO:0030154(cell differentiation);GO:0033391(chromatoid body)	NA	NA	NA	PREDICTED: tudor domain-containing protein 15 isoform X2 [Rattus norvegicus]	0.816034	0.817452	0.114804	0.327819	3.69047	1.8838	0.00310107	0.135019	up	yes
ENSRNOG00000019496	Stat5a	ENSRNOT00000026662	GO:0000255(allantoin metabolic process);GO:0000979(RNA polymerase II core promoter sequence-specific DNA binding);GO:0001077(transcriptional activator activity, RNA polymerase II core promoter proximal region sequence-specific binding);GO:0001553(luteinization);GO:0001779(natural killer cell differentiation);GO:0001938(positive regulation of endothelial cell proliferation);GO:0003677(DNA binding)…	04012(ErbB signaling pathway);04630(Jak-STAT signaling pathway);04917(Prolactin signaling pathway);05200(Pathways in cancer);05203(Viral carcinogenesis);05221(Acute myeloid leukemia);05220(Chronic myeloid leukemia);04933(AGE-RAGE signaling pathway in diabetic complications);05166(HTLV-I infection);05162(Measles);05161(Hepatitis B)	K11223	NA	rCG35111 [Rattus norvegicus]	4.74821	5.57313	2.05518	2.19169	2.43034	1.28116	0.00310492	0.135019	up	yes
ENSRNOG00000015581	Dnah6	ENSRNOT00000020894	GO:0003777(microtubule motor activity);GO:0005524(ATP binding);GO:0005858(axonemal dynein complex);GO:0007018(microtubule-based movement);GO:0016887(ATPase activity)	05016(Huntington's disease)	K10408	NA	PREDICTED: dynein heavy chain 6, axonemal isoform X1 [Rattus norvegicus]	0.020901	0.025299	0.174521	0.076717	0.183889	-2.44309	0.00314558	0.136293	down	yes
ENSRNOG00000030225	Clpx	ENSRNOT00000048302	GO:0003674(molecular_function);GO:0004176(ATP-dependent peptidase activity);GO:0005524(ATP binding);GO:0005575(cellular_component);GO:0005654(nucleoplasm);GO:0005737(cytoplasm);GO:0005739(mitochondrion);GO:0005743(mitochondrial inner membrane);GO:0005759(mitochondrial matrix);GO:0006457(protein folding);GO:0006508(proteolysis);GO:0008150(biological_process);GO:0009368(endopeptidase Clp complex);G…	NA	NA	NA	ATP-dependent Clp protease ATP-binding subunit clpX-like, mitochondrial precursor [Rattus norvegicus]	47.9064	41.6918	17.4948	21.8467	2.27745	1.18742	0.00326388	0.140673	up	yes
ENSRNOG00000007237	Id2	ENSRNOT00000009491;ENSRNOT00000085925	GO:0000122(negative regulation of transcription from RNA polymerase II promoter);GO:0000785(chromatin);GO:0001656(metanephros development);GO:0001779(natural killer cell differentiation);GO:0001966(thigmotaxis);GO:0002521(leukocyte differentiation);GO:0003149(membranous septum morphogenesis);GO:0003166(bundle of His development);GO:0005515(protein binding);GO:0005634(nucleus);GO:0005654(nucleopla…	04350(TGF-beta signaling pathway);04390(Hippo signaling pathway);04550(Signaling pathways regulating pluripotency of stem cells);05202(Transcriptional misregulation in cancers);05202(Transcriptional misregulation in cancers)	K17693	NA	Id2 protein, partial [Mus musculus]	47.5677	29.7801	18.2	14.3089	2.37928	1.25053	0.00327407	0.140673	up	yes
ENSRNOG00000001976	Tmprss2	ENSRNOT00000066413;ENSRNOT00000002713	GO:0004252(serine-type endopeptidase activity);GO:0005044(scavenger receptor activity);GO:0005886(plasma membrane);GO:0006508(proteolysis);GO:0006898(receptor-mediated endocytosis);GO:0016020(membrane);GO:0016021(integral component of membrane);GO:0016540(protein autoprocessing);GO:0046598(positive regulation of viral entry into host cell);GO:0070062(extracellular exosome);GO:0070062(extracellula…	05202(Transcriptional misregulation in cancers);05164(Influenza A);05164(Influenza A)	K09633	EC:3.4.21.-	TMPRSS2 [Rattus norvegicus]	16.9209	2.81065	2.35847	2.83223	3.80133	1.9265	0.00328183	0.140673	up	yes
ENSRNOG00000019075	Stat5b	ENSRNOT00000026354;ENSRNOT00000081247	GO:0000255(allantoin metabolic process);GO:0000979(RNA polymerase II core promoter sequence-specific DNA binding);GO:0001077(transcriptional activator activity, RNA polymerase II core promoter proximal region sequence-specific binding);GO:0001553(luteinization);GO:0001666(response to hypoxia);GO:0001779(natural killer cell differentiation);GO:0001889(liver development);GO:0003677(DNA binding);GO:…	04012(ErbB signaling pathway);04630(Jak-STAT signaling pathway);04062(Chemokine signaling pathway);04917(Prolactin signaling pathway);05200(Pathways in cancer);05203(Viral carcinogenesis);05221(Acute myeloid leukemia);05220(Chronic myeloid leukemia);04933(AGE-RAGE signaling pathway in diabetic complications);05166(HTLV-I infection);05162(Measles);05161(Hepatitis B);05161(Hepatitis B)	K11224	NA	signal transducer and activator of transcription 5B [Rattus norvegicus]	13.9328	12.0591	6.19688	5.20088	2.28043	1.18931	0.00329649	0.140799	up	yes
ENSRNOG00000018835	Notch2	ENSRNOT00000025718;ENSRNOT00000093564	GO:0000122(negative regulation of transcription from RNA polymerase II promoter);GO:0001701(in utero embryonic development);GO:0001709(cell fate determination);GO:0001889(liver development);GO:0001890(placenta development);GO:0001947(heart looping);GO:0002011(morphogenesis of an epithelial sheet);GO:0002315(marginal zone B cell differentiation);GO:0002437(inflammatory response to antigenic stimul…	04330(Notch signaling pathway);04919(Thyroid hormone signaling pathway);04320(Dorso-ventral axis formation);05206(MicroRNAs in cancer);05206(MicroRNAs in cancer)	K02599	NA	neurogenic locus notch homolog protein 2 precursor [Rattus norvegicus]	3.30625	4.41177	1.44048	1.92108	2.29596	1.1991	0.00337905	0.143813	up	yes
ENSRNOG00000052862	RF00017	ENSRNOT00000091327	GO:0005802(trans-Golgi network);GO:0032438(melanosome organization);GO:0042470(melanosome);GO:0072657(protein localization to membrane)	NA	NA	NA	PREDICTED: uncharacterized protein LOC103017900 [Balaenoptera acutorostrata scammoni]	5.02159	5.8989	1.04181	0	10.4823	3.38988	0.00341243	0.144721	up	yes
ENSRNOG00000002946	Socs3	ENSRNOT00000003940	GO:0001558(regulation of cell growth);GO:0001666(response to hypoxia);GO:0001932(regulation of protein phosphorylation);GO:0004860(protein kinase inhibitor activity);GO:0005622(intracellular);GO:0005737(cytoplasm);GO:0006469(negative regulation of protein kinase activity);GO:0007165(signal transduction);GO:0007259(JAK-STAT cascade);GO:0007568(aging);GO:0009408(response to heat);GO:0009617(respons…	04120(Ubiquitin mediated proteolysis);04630(Jak-STAT signaling pathway);04668(TNF signaling pathway);04910(Insulin signaling pathway);04920(Adipocytokine signaling pathway);04917(Prolactin signaling pathway);04380(Osteoclast differentiation);04930(Type II diabetes mellitus);04932(Non-alcoholic fatty liver disease (NAFLD));04931(Insulin resistance);05164(Influenza A);05160(Hepatitis C);05168(Herpe…	K04696	NA	PREDICTED: suppressor of cytokine signaling 3 isoform X1 [Rattus norvegicus]	30.9295	17.783	10.3478	9.18889	2.49339	1.31811	0.00346204	0.146062	up	yes
ENSRNOG00000004937	AABR07057765.1	ENSRNOT00000093026	GO:0016021(integral component of membrane);GO:0003674(molecular_function);GO:0005575(cellular_component);GO:0005886(plasma membrane);GO:0008150(biological_process);GO:0016020(membrane)	04640(Hematopoietic cell lineage);04610(Complement and coagulation cascades);04662(B cell receptor signaling pathway);05169(Epstein-Barr virus infection);04977(Vitamin digestion and absorption)	K04012	NA	PREDICTED: CUB and sushi domain-containing protein 3 isoform X2 [Rattus norvegicus]	0.00615397	0.0215582	0.0907682	0.0853506	0.157349	-2.66796	0.00346839	0.146062	down	yes
ENSRNOG00000006589	LOC103694877	ENSRNOT00000008608	GO:0001516(prostaglandin biosynthetic process);GO:0001934(positive regulation of protein phosphorylation);GO:0001942(hair follicle development);GO:0002035(brain renin-angiotensin system);GO:0002675(positive regulation of acute inflammatory response);GO:0002906(negative regulation of mature B cell apoptotic process);GO:0004167(dopachrome isomerase activity);GO:0005102(receptor binding);GO:0005125(…	00350(Tyrosine metabolism);00360(Phenylalanine metabolism)	K07253	EC:5.3.2.1	macrophage migration inhibitory factor [Rattus norvegicus]	107.666	124.549	219.652	347.006	0.409796	-1.28702	0.003508	0.146814	down	yes
ENSRNOG00000007539	Rsad2	ENSRNOT00000010092	GO:0001503(ossification);GO:0003674(molecular_function);GO:0003824(catalytic activity);GO:0005739(mitochondrion);GO:0005741(mitochondrial outer membrane);GO:0005743(mitochondrial inner membrane);GO:0005783(endoplasmic reticulum);GO:0005789(endoplasmic reticulum membrane);GO:0005811(lipid particle);GO:0009615(response to virus);GO:0030278(regulation of ossification);GO:0034157(positive regulation …	05164(Influenza A)	K15045	NA	rCG62278 [Rattus norvegicus]	3.91912	0.506772	0.470111	0.4032	5.06794	2.3414	0.00351469	0.146814	up	yes
ENSRNOG00000028896	LOC100911545	ENSRNOT00000019346	GO:0001553(luteinization);GO:0001869(negative regulation of complement activation, lectin pathway);GO:0002020(protease binding);GO:0002438(acute inflammatory response to antigenic stimulus);GO:0004866(endopeptidase inhibitor activity);GO:0004867(serine-type endopeptidase inhibitor activity);GO:0005102(receptor binding);GO:0005615(extracellular space);GO:0006953(acute-phase response);GO:0007584(re…	04610(Complement and coagulation cascades)	K03910	NA	alpha-2-macroglobulin precursor [Rattus norvegicus]	3.28738	0.108149	0.209409	0.154211	9.33812	3.22313	0.00352295	0.146814	up	yes
ENSRNOG00000018899	C5	ENSRNOT00000092736;ENSRNOT00000025534;ENSRNOT00000092865	GO:0001701(in utero embryonic development);GO:0002376(immune system process);GO:0004866(endopeptidase inhibitor activity);GO:0005576(extracellular region);GO:0005579(membrane attack complex);GO:0005615(extracellular space);GO:0006954(inflammatory response);GO:0006957(complement activation, alternative pathway);GO:0006958(complement activation, classical pathway);GO:0010575(positive regulation of …	04610(Complement and coagulation cascades);05322(Systemic lupus erythematosus);05020(Prion diseases);05133(Pertussis);05150(Staphylococcus aureus infection);05168(Herpes simplex infection);05168(Herpes simplex infection)	K03994	NA	PREDICTED: complement C5 isoform X3 [Rattus norvegicus]	141.434	99.7286	47.9854	54.2325	2.3593	1.23836	0.00361323	0.149927	up	yes
ENSRNOG00000025702	Kdm2b	ENSRNOT00000044071	GO:0000122(negative regulation of transcription from RNA polymerase II promoter);GO:0000979(RNA polymerase II core promoter sequence-specific DNA binding);GO:0003674(molecular_function);GO:0005575(cellular_component);GO:0007283(spermatogenesis);GO:0008150(biological_process);GO:0008270(zinc ion binding);GO:0021555(midbrain-hindbrain boundary morphogenesis);GO:0021592(fourth ventricle development)…	00270(Cysteine and methionine metabolism)	K00558	EC:2.1.1.37	lysine-specific demethylase 2B [Rattus norvegicus]	5.1915	4.99745	1.71604	2.63587	2.34126	1.22729	0.00363724	0.149927	up	yes
ENSRNOG00000026577	Cpne4	ENSRNOT00000016749	GO:0070062(extracellular exosome)	NA	NA	NA	copine-4 [Rattus norvegicus]	0.064941	0.277796	0.832556	1.0027	0.186752	-2.4208	0.00365284	0.149927	down	yes
ENSRNOG00000019481	Cyp8b1	ENSRNOT00000026355	GO:0005506(iron ion binding);GO:0005789(endoplasmic reticulum membrane);GO:0020037(heme binding);GO:0055114(oxidation-reduction process)	00120(Primary bile acid biosynthesis);03320(PPAR signaling pathway)	K07431	EC:1.14.18.8;EC:1.14.13.96	cytochrome P450, family 8, subfamily b, polypeptide 1 [Rattus norvegicus]	150.847	75.4188	359.238	233.675	0.381617	-1.3898	0.0036557	0.149927	down	yes
ENSRNOG00000004517	Igf1	ENSRNOT00000005995;ENSRNOT00000081822;ENSRNOT00000085680;ENSRNOT00000038780	GO:0001775(cell activation);GO:0005158(insulin receptor binding);GO:0005159(insulin-like growth factor receptor binding);GO:0005178(integrin binding);GO:0005179(hormone activity);GO:0005615(extracellular space);GO:0005622(intracellular);GO:0008083(growth factor activity);GO:0008284(positive regulation of cell proliferation);GO:0009408(response to heat);GO:0010560(positive regulation of glycoprote…	04014(Ras signaling pathway);04015(Rap1 signaling pathway);04066(HIF-1 signaling pathway);04068(FoxO signaling pathway);04151(PI3K-Akt signaling pathway);04152(AMPK signaling pathway);04150(mTOR signaling pathway);04114(Oocyte meiosis);04115(p53 signaling pathway);04510(Focal adhesion);04550(Signaling pathways regulating pluripotency of stem cells);04913(Ovarian Steroidogenesis);04914(Progesteron…	K05459	NA	insulin-like growth factor 1, isoform CRA_a [Rattus norvegicus]	84.0522	65.0226	150.446	205.948	0.418287	-1.25744	0.00366011	0.149927	down	yes
ENSRNOG00000008902	Pon1	ENSRNOT00000011823	GO:0004063(aryldialkylphosphatase activity);GO:0004064(arylesterase activity);GO:0005509(calcium ion binding);GO:0005543(phospholipid binding);GO:0005615(extracellular space);GO:0006629(lipid metabolic process);GO:0008203(cholesterol metabolic process);GO:0009636(response to toxic substance);GO:0010875(positive regulation of cholesterol efflux);GO:0016311(dephosphorylation);GO:0019439(aromatic co…	NA	NA	NA	serum paraoxonase/arylesterase 1 precursor [Rattus norvegicus]	366.584	350.513	855.813	855.374	0.419064	-1.25476	0.00370641	0.151307	down	yes
ENSRNOG00000014691	Ric3	ENSRNOT00000020137	GO:0005783(endoplasmic reticulum);GO:0006457(protein folding);GO:0007204(positive regulation of cytosolic calcium ion concentration);GO:0007271(synaptic transmission, cholinergic);GO:0016021(integral component of membrane);GO:0033130(acetylcholine receptor binding);GO:0034394(protein localization to cell surface);GO:0043005(neuron projection);GO:0043025(neuronal cell body);GO:0043231(intracellula…	NA	NA	NA	protein RIC-3 isoform 1 [Rattus norvegicus]	0.542072	0.351159	0.061907	0.128877	4.6819	2.22709	0.00375217	0.152656	up	yes
ENSRNOG00000005447	Ypel2	ENSRNOT00000007379	GO:0005730(nucleolus);GO:0046872(metal ion binding)	04010(MAPK signaling pathway);04012(ErbB signaling pathway);04350(TGF-beta signaling pathway);04370(VEGF signaling pathway);04068(FoxO signaling pathway);04150(mTOR signaling pathway);04810(Regulation of actin cytoskeleton);04114(Oocyte meiosis);04510(Focal adhesion);04520(Adherens junction);04540(Gap junction);04620(Toll-like receptor signaling pathway);04621(NOD-like receptor signaling pathway)…	K04371	EC:2.7.11.24	PREDICTED: protein yippee-like 2 [Chinchilla lanigera]	4.15438	4.77404	1.51919	1.84822	2.65143	1.40677	0.0039144	0.158718	up	yes
ENSRNOG00000014702	Elovl2	ENSRNOT00000019756	GO:0000038(very long-chain fatty acid metabolic process);GO:0005783(endoplasmic reticulum);GO:0005789(endoplasmic reticulum membrane);GO:0006636(unsaturated fatty acid biosynthetic process);GO:0009922(fatty acid elongase activity);GO:0016021(integral component of membrane);GO:0016747(transferase activity, transferring acyl groups other than amino-acyl groups);GO:0034626(fatty acid elongation, pol…	01212(Fatty acid metabolism);00062(Fatty acid elongation);01040(Biosynthesis of unsaturated fatty acids)	K10205	EC:2.3.1.199	PREDICTED: elongation of very long chain fatty acids protein 2 [Microtus ochrogaster]	6.80472	2.87265	13.2654	11.152	0.396331	-1.33522	0.00393169	0.158882	down	yes
ENSRNOG00000004307	Tor3a	ENSRNOT00000005726	GO:0003855(3-dehydroquinate dehydratase activity);GO:0005524(ATP binding);GO:0005783(endoplasmic reticulum);GO:0005788(endoplasmic reticulum lumen);GO:0016887(ATPase activity);GO:0070062(extracellular exosome)	NA	NA	NA	torsin-3A precursor [Rattus norvegicus]	16.6843	3.69141	1.65231	3.78513	3.74729	1.90585	0.00399743	0.160997	up	yes
ENSRNOG00000049070	Rack1	ENSRNOT00000072179	GO:0001891(phagocytic cup);GO:0001934(positive regulation of protein phosphorylation);GO:0005080(protein kinase C binding);GO:0005634(nucleus);GO:0005737(cytoplasm);GO:0005739(mitochondrion);GO:0005829(cytosol);GO:0006919(activation of cysteine-type endopeptidase activity involved in apoptotic process);GO:0007165(signal transduction);GO:0008200(ion channel inhibitor activity);GO:0008656(cysteine-…	05162(Measles)	K14753	NA	lung cancer oncogene 7 [Homo sapiens]	2.17706	1.5691	0.402877	0.456464	4.35935	2.12411	0.00403528	0.161918	up	yes
ENSRNOG00000049277	LOC108348128	ENSRNOT00000028265	GO:0005737(cytoplasm);GO:0007052(mitotic spindle organization);GO:0031309(integral component of nuclear outer membrane);GO:0034993(LINC complex);GO:0044732(mitotic spindle pole body);GO:0045198(establishment of epithelial cell apical/basal polarity);GO:0071790(establishment of spindle pole body localization to nuclear envelope);GO:1903087(mitotic spindle pole body duplication)	NA	NA	NA	nesprin-4 [Rattus norvegicus]	6.55386	4.98888	1.99135	0.320746	4.99232	2.31971	0.00404727	0.161918	up	yes
ENSRNOG00000015438	Ces1f	ENSRNOT00000024622;ENSRNOT00000074070;ENSRNOT00000083500;ENSRNOT00000020775;ENSRNOT00000024187;ENSRNOT00000074479;ENSRNOT00000085762	GO:0005788(endoplasmic reticulum lumen);GO:0052689(carboxylic ester hydrolase activity);GO:0005615(extracellular space);GO:0016290(palmitoyl-CoA hydrolase activity);GO:0003723(RNA binding);GO:0016787(hydrolase activity);GO:0016788(hydrolase activity, acting on ester bonds);GO:0030855(epithelial cell differentiation);GO:0030855(epithelial cell differentiation)	00983(Drug metabolism - other enzymes);00983(Drug metabolism - other enzymes)	K01044	EC:3.1.1.1	PREDICTED: carboxylesterase 1C isoform X1 [Rattus norvegicus]	91.5777	108.932	245.936	229.246	0.421965	-1.2448	0.00414362	0.165222	down	yes
ENSRNOG00000046366	Dmd	ENSRNOT00000034372;ENSRNOT00000081061;ENSRNOT00000035692;ENSRNOT00000091467	GO:0001954(positive regulation of cell-matrix adhesion);GO:0002027(regulation of heart rate);GO:0002162(dystroglycan binding);GO:0003779(actin binding);GO:0005178(integrin binding);GO:0005200(structural constituent of cytoskeleton);GO:0005515(protein binding);GO:0005521(lamin binding);GO:0005634(nucleus);GO:0005856(cytoskeleton);GO:0005886(plasma membrane);GO:0006355(regulation of transcription, …	05410(Hypertrophic cardiomyopathy (HCM));05412(Arrhythmogenic right ventricular cardiomyopathy (ARVC));05414(Dilated cardiomyopathy (DCM));05416(Viral myocarditis);05416(Viral myocarditis)	K10366	NA	dystrophin isoform Dp71a [Rattus norvegicus]	0.234721	0.19778	0.264629	1.52462	0.241722	-2.04858	0.00418211	0.166026	down	yes
ENSRNOG00000010337	Slc13a2	ENSRNOT00000038690;ENSRNOT00000085074	GO:0005215(transporter activity);GO:0005887(integral component of plasma membrane);GO:0006814(sodium ion transport);GO:0006835(dicarboxylic acid transport);GO:0015361(low-affinity sodium:dicarboxylate symporter activity);GO:0016021(integral component of membrane);GO:0055085(transmembrane transport);GO:0070062(extracellular exosome);GO:0070062(extracellular exosome)	NA	NA	NA	intestinal sodium/dicarboxylate cotransporter [Rattus norvegicus]	0.245561	0.749326	1.07987	3.91495	0.199183	-2.32783	0.00419772	0.166026	down	yes
ENSRNOG00000052141	Rps10l1	ENSRNOT00000043250	GO:0000028(ribosomal small subunit assembly);GO:0000049(tRNA binding);GO:0003735(structural constituent of ribosome);GO:0005634(nucleus);GO:0005730(nucleolus);GO:0005737(cytoplasm);GO:0005840(ribosome);GO:0005925(focal adhesion);GO:0016020(membrane);GO:0022627(cytosolic small ribosomal subunit);GO:0030529(intracellular ribonucleoprotein complex);GO:0044822(poly(A) RNA binding);GO:0070062(extracel…	03010(Ribosome)	K02947	NA	mCG129780 [Mus musculus]	16.6621	25.5023	54.2377	48.2982	0.411216	-1.28203	0.00420646	0.166026	down	yes
ENSRNOG00000015072	Ptgr1	ENSRNOT00000020335	GO:0005737(cytoplasm);GO:0006693(prostaglandin metabolic process);GO:0008270(zinc ion binding);GO:0032440(2-alkenal reductase [NAD(P)] activity);GO:0036132(13-prostaglandin reductase activity);GO:0047522(15-oxoprostaglandin 13-oxidase activity);GO:0055114(oxidation-reduction process);GO:0070062(extracellular exosome);GO:0097327(response to antineoplastic agent)	04115(p53 signaling pathway)	K10133	EC:1.-.-.-	prostaglandin reductase 1 [Rattus norvegicus]	12.5102	17.9741	51.5894	27.1581	0.387115	-1.36916	0.00422102	0.166026	down	yes
ENSRNOG00000000165	Pfkfb1	ENSRNOT00000033656;ENSRNOT00000081239;ENSRNOT00000000178	GO:0003873(6-phosphofructo-2-kinase activity);GO:0004331(fructose-2,6-bisphosphate 2-phosphatase activity);GO:0005524(ATP binding);GO:0005829(cytosol);GO:0006000(fructose metabolic process);GO:0006003(fructose 2,6-bisphosphate metabolic process);GO:0006094(gluconeogenesis);GO:0006112(energy reserve metabolic process);GO:0016311(dephosphorylation);GO:0019900(kinase binding);GO:0031100(organ regene…	00051(Fructose and mannose metabolism);04152(AMPK signaling pathway);04922(Glucagon signaling pathway);04922(Glucagon signaling pathway)	K19028	EC:2.7.1.105;EC:3.1.3.46	PREDICTED: 6-phosphofructo-2-kinase/fructose-2,6-bisphosphatase 1 isoform X1 [Myotis brandtii]	4.39709	1.85492	5.82765	12.4483	0.342089	-1.54756	0.00423295	0.166026	down	yes
ENSRNOG00000017084	Hsd11b2	ENSRNOT00000023130;ENSRNOT00000092794;ENSRNOT00000093093	GO:0001666(response to hypoxia);GO:0002017(regulation of blood volume by renal aldosterone);GO:0003845(11-beta-hydroxysteroid dehydrogenase [NAD(P)] activity);GO:0005496(steroid binding);GO:0005737(cytoplasm);GO:0005783(endoplasmic reticulum);GO:0007565(female pregnancy);GO:0008211(glucocorticoid metabolic process);GO:0032094(response to food);GO:0032868(response to insulin);GO:0042493(response t…	00140(Steroid hormone biosynthesis);04960(Aldosterone-regulated sodium reabsorption);04960(Aldosterone-regulated sodium reabsorption)	K00071	EC:1.1.1.-	PREDICTED: corticosteroid 11-beta-dehydrogenase isozyme 2 isoform X1 [Rattus norvegicus]	0.167814	0.111851	0.708919	0.614723	0.211285	-2.24274	0.00425262	0.166254	down	yes
ENSRNOG00000009892	Adamts15	ENSRNOT00000013341	GO:0004175(endopeptidase activity);GO:0004222(metalloendopeptidase activity);GO:0005578(proteinaceous extracellular matrix);GO:0005615(extracellular space);GO:0006508(proteolysis);GO:0007229(integrin-mediated signaling pathway);GO:0008201(heparin binding);GO:0008270(zinc ion binding);GO:0009986(cell surface);GO:0050840(extracellular matrix binding)	00510(N-Glycan biosynthesis);00514(Other types of O-glycan biosynthesis);00533(Glycosaminoglycan biosynthesis - keratan sulfate);00601(Glycosphingolipid biosynthesis - lacto and neolacto series)	K07968	EC:2.4.1.90;EC:2.4.1.38	A disintegrin and metalloproteinase with thrombospondin motifs 15 precursor [Rattus norvegicus]	0.302307	0.429282	0.060442	0.108806	4.32259	2.11189	0.00427206	0.166295	up	yes
ENSRNOG00000009921	Serpina3m	ENSRNOT00000013175	GO:0004867(serine-type endopeptidase inhibitor activity);GO:0005615(extracellular space);GO:0010951(negative regulation of endopeptidase activity)	04610(Complement and coagulation cascades)	K03984	NA	serine protease inhibitor A3M precursor [Rattus norvegicus]	58.5905	38.7755	111.654	112.966	0.43347	-1.206	0.00428138	0.166295	down	yes
ENSRNOG00000057751	Gdf2	ENSRNOT00000085255	GO:0001525(angiogenesis);GO:0001569(patterning of blood vessels);GO:0001570(vasculogenesis);GO:0001649(osteoblast differentiation);GO:0001937(negative regulation of endothelial cell proliferation);GO:0001938(positive regulation of endothelial cell proliferation);GO:0005125(cytokine activity);GO:0005160(transforming growth factor beta receptor binding);GO:0005615(extracellular space);GO:0008083(gr…	04340(Hedgehog signaling pathway);04350(TGF-beta signaling pathway);04060(Cytokine-cytokine receptor interaction)	K04662	NA	growth/differentiation factor 2 precursor [Rattus norvegicus]	4.05148	3.56525	9.10943	8.3378	0.436558	-1.19576	0.00434151	0.168014	down	yes
ENSRNOG00000018445	Agt	ENSRNOT00000024917	GO:0001543(ovarian follicle rupture);GO:0001568(blood vessel development);GO:0001658(branching involved in ureteric bud morphogenesis);GO:0001822(kidney development);GO:0001991(regulation of systemic arterial blood pressure by circulatory renin-angiotensin);GO:0001998(angiotensin mediated vasoconstriction involved in regulation of systemic arterial blood pressure);GO:0001999(renal response to blo…	04924(Renin secretion);04614(Renin-angiotensin system);04270(Vascular smooth muscle contraction);05410(Hypertrophic cardiomyopathy (HCM))	K09821	NA	angiotensinogen precursor [Rattus norvegicus]	196.368	145.294	410.411	391.826	0.425886	-1.23146	0.00435365	0.168014	down	yes
ENSRNOG00000055466	Derl2	ENSRNOT00000089638	GO:0001967(suckling behavior);GO:0003674(molecular_function);GO:0005769(early endosome);GO:0005770(late endosome);GO:0005783(endoplasmic reticulum);GO:0006986(response to unfolded protein);GO:0008284(positive regulation of cell proliferation);GO:0016020(membrane);GO:0016021(integral component of membrane);GO:0030176(integral component of endoplasmic reticulum membrane);GO:0030307(positive regulat…	04141(Protein processing in endoplasmic reticulum)	K13989	NA	PREDICTED: derlin-2 isoform X3 [Pan troglodytes]	19.1194	17.3913	34.7659	48.3261	0.4394	-1.18639	0.00438874	0.168826	down	yes
ENSRNOG00000006305	Slc38a2	ENSRNOT00000039002	GO:0003333(amino acid transmembrane transport);GO:0003674(molecular_function);GO:0005886(plasma membrane);GO:0005887(integral component of plasma membrane);GO:0005903(brush border);GO:0006814(sodium ion transport);GO:0006865(amino acid transport);GO:0007565(female pregnancy);GO:0015171(amino acid transmembrane transporter activity);GO:0015293(symporter activity);GO:0021987(cerebral cortex develop…	04974(Protein digestion and absorption);04724(Glutamatergic synapse);04727(GABAergic synapse)	K14207	NA	RecName: Full=Sodium-coupled neutral amino acid transporter 2; AltName: Full=Amino acid transporter A2; AltName: Full=Solute carrier family 38 member 2; AltName: Full=System A amino acid transporter 2; AltName: Full=System A transporter 1; AltName: Full=System N amino acid transporter 2	20.7711	15.1139	36.1916	46.3774	0.434607	-1.20222	0.00447389	0.171243	down	yes
ENSRNOG00000013663	Tmem86a	ENSRNOT00000018688	GO:0016021(integral component of membrane)	00566(Ether lipid metabolism)	K18575	EC:3.3.2.2;EC:3.3.2.5	lysoplasmalogenase-like protein TMEM86A [Rattus norvegicus]	5.42037	2.55184	12.0075	8.79458	0.383241	-1.38368	0.00448012	0.171243	down	yes
ENSRNOG00000000498	Anks1a	ENSRNOT00000044395;ENSRNOT00000081604	GO:0005654(nucleoplasm);GO:0005737(cytoplasm);GO:0046875(ephrin receptor binding);GO:1901187(regulation of ephrin receptor signaling pathway);GO:2000059(negative regulation of protein ubiquitination involved in ubiquitin-dependent protein catabolic process);GO:2000059(negative regulation of protein ubiquitination involved in ubiquitin-dependent protein catabolic process)	00562(Inositol phosphate metabolism);04070(Phosphatidylinositol signaling system);04910(Insulin signaling pathway);04910(Insulin signaling pathway)	K15909	EC:3.1.3.86	PREDICTED: ankyrin repeat and SAM domain-containing protein 1A isoform X2 [Rattus norvegicus]	1.16506	1.61754	2.99148	4.02441	0.396614	-1.33419	0.00453605	0.172805	down	yes
ENSRNOG00000046944	AC110709.1	ENSRNOT00000073153	GO:0003735(structural constituent of ribosome);GO:0006412(translation);GO:0016020(membrane);GO:0022627(cytosolic small ribosomal subunit);GO:0044822(poly(A) RNA binding)	03010(Ribosome)	K02951	NA	40S ribosomal protein S12 [Homo sapiens]	11.6516	8.34314	37.0074	19.7679	0.352174	-1.50564	0.00454976	0.172805	down	yes
ENSRNOG00000011994	Perp	ENSRNOT00000016037	GO:0002934(desmosome organization);GO:0005739(mitochondrion);GO:0005794(Golgi apparatus);GO:0005887(integral component of plasma membrane);GO:0007219(Notch signaling pathway);GO:0030054(cell junction);GO:0034113(heterotypic cell-cell adhesion);GO:0045862(positive regulation of proteolysis);GO:0072332(intrinsic apoptotic signaling pathway by p53 class mediator);GO:0097186(amelogenesis);GO:0097202(…	04115(p53 signaling pathway)	K10136	NA	p53 apoptosis effector related to PMP-22 [Rattus norvegicus]	6.49483	4.65609	10.3023	15.9224	0.425206	-1.23377	0.00470838	0.178265	down	yes
ENSRNOG00000020597	RGD1305014	ENSRNOT00000027956	GO:0042802(identical protein binding)	NA	NA	NA	uncharacterized protein C10orf88 homolog [Rattus norvegicus]	0.705811	0.55177	0.162623	0.08341	5.11143	2.35373	0.00482014	0.181923	up	yes
ENSRNOG00000028243	Derl3	ENSRNOT00000038623	GO:0005789(endoplasmic reticulum membrane);GO:0016021(integral component of membrane);GO:0018279(protein N-linked glycosylation via asparagine);GO:0030176(integral component of endoplasmic reticulum membrane);GO:0030433(ER-associated ubiquitin-dependent protein catabolic process);GO:0030968(endoplasmic reticulum unfolded protein response)	04141(Protein processing in endoplasmic reticulum)	K13989	NA	derlin-3 [Rattus norvegicus]	0.935537	0.457855	3.89375	2.37263	0.22236	-2.16903	0.00490178	0.184424	down	yes
ENSRNOG00000007690	Cmpk2	ENSRNOT00000052003	GO:0004127(cytidylate kinase activity);GO:0004550(nucleoside diphosphate kinase activity);GO:0004798(thymidylate kinase activity);GO:0005634(nucleus);GO:0005654(nucleoplasm);GO:0005739(mitochondrion);GO:0005829(cytosol);GO:0006165(nucleoside diphosphate phosphorylation);GO:0006227(dUDP biosynthetic process);GO:0006233(dTDP biosynthetic process);GO:0006235(dTTP biosynthetic process);GO:0009041(uri…	00240(Pyrimidine metabolism)	K13809	EC:2.7.4.14	PREDICTED: UMP-CMP kinase 2, mitochondrial isoform X1 [Rattus norvegicus]	5.47661	0.654402	0.691154	0.656717	4.54866	2.18544	0.00499869	0.187407	up	yes
ENSRNOG00000014310	Tmtc4	ENSRNOT00000019602;ENSRNOT00000078424	GO:0016021(integral component of membrane);GO:0016021(integral component of membrane)	NA	NA	NA	PREDICTED: transmembrane and TPR repeat-containing protein 4 isoform X1 [Rattus norvegicus]	0.522922	0.43316	2.13941	1.18628	0.287484	-1.79845	0.00502587	0.187407	down	yes
ENSRNOG00000018267	B3gnt7	ENSRNOT00000024578	GO:0000139(Golgi membrane);GO:0003674(molecular_function);GO:0005575(cellular_component);GO:0006486(protein glycosylation);GO:0008150(biological_process);GO:0008378(galactosyltransferase activity);GO:0016021(integral component of membrane)	00533(Glycosaminoglycan biosynthesis - keratan sulfate)	K09664	EC:2.4.1.-	UDP-GlcNAc:betaGal beta-1,3-N-acetylglucosaminyltransferase 7 [Rattus norvegicus]	4.36404	1.79645	1.1056	0.810809	3.2146	1.68464	0.00502791	0.187407	up	yes
ENSRNOG00000047864	RT1-DMa	ENSRNOT00000070886;ENSRNOT00000078382;ENSRNOT00000080583	GO:0002504(antigen processing and presentation of peptide or polysaccharide antigen via MHC class II);GO:0006955(immune response);GO:0016021(integral component of membrane);GO:0042613(MHC class II protein complex);GO:0042613(MHC class II protein complex)	04514(Cell adhesion molecules (CAMs));04145(Phagosome);04612(Antigen processing and presentation);04672(Intestinal immune network for IgA production);05310(Asthma);05322(Systemic lupus erythematosus);05323(Rheumatoid arthritis);05320(Autoimmune thyroid disease);05321(Inflammatiory bowel disease (IBD));05330(Allograft rejection);05332(Graft-versus-host disease);05416(Viral myocarditis);04940(Type …	K06752	NA	RT1-DMa, partial [Rattus norvegicus]	1.88401	1.69722	4.44734	5.47582	0.360896	-1.47034	0.00516607	0.19196	down	yes
ENSRNOG00000048088	Mest	ENSRNOT00000072698	GO:0003824(catalytic activity);GO:0005783(endoplasmic reticulum);GO:0005789(endoplasmic reticulum membrane);GO:0007498(mesoderm development);GO:0010883(regulation of lipid storage);GO:0016021(integral component of membrane);GO:0016787(hydrolase activity);GO:0032526(response to retinoic acid);GO:0070062(extracellular exosome)	NA	NA	NA	mesoderm-specific transcript homolog protein [Rattus norvegicus]	1.58853	1.3141	10.0176	2.19138	0.237745	-2.07251	0.00522256	0.19346	down	yes
ENSRNOG00000011557	S100a8	ENSRNOT00000015473	GO:0002523(leukocyte migration involved in inflammatory response);GO:0002526(acute inflammatory response);GO:0002544(chronic inflammatory response);GO:0002793(positive regulation of peptide secretion);GO:0003674(molecular_function);GO:0005509(calcium ion binding);GO:0005615(extracellular space);GO:0005634(nucleus);GO:0005737(cytoplasm);GO:0005856(cytoskeleton);GO:0005886(plasma membrane);GO:00069…	NA	NA	NA	protein S100-A8 [Rattus norvegicus]	20.9959	6.36507	0.635176	4.42629	5.40575	2.4345	0.00525881	0.193772	up	yes
ENSRNOG00000047076	Oas1i	ENSRNOT00000041741	GO:0003725(double-stranded RNA binding);GO:0005524(ATP binding);GO:0006955(immune response);GO:0016021(integral component of membrane);GO:0016779(nucleotidyltransferase activity);GO:0051607(defense response to virus)	05162(Measles);05164(Influenza A);05160(Hepatitis C);05168(Herpes simplex infection)	K14216	EC:2.7.7.84	2 ' -5 ' oligoadenylate synthetase 1I [Rattus norvegicus]	6.87214	2.05922	0.857957	1.61359	3.61366	1.85346	0.00526326	0.193772	up	yes
ENSRNOG00000008837	Ass1	ENSRNOT00000093365;ENSRNOT00000093400;ENSRNOT00000012075	GO:0000050(urea cycle);GO:0000052(citrulline metabolic process);GO:0000053(argininosuccinate metabolic process);GO:0001822(kidney development);GO:0001889(liver development);GO:0004055(argininosuccinate synthase activity);GO:0005524(ATP binding);GO:0005634(nucleus);GO:0005737(cytoplasm);GO:0005739(mitochondrion);GO:0005741(mitochondrial outer membrane);GO:0005764(lysosome);GO:0005783(endoplasmic r…	01230(Biosynthesis of amino acids);00250(Alanine, aspartate and glutamate metabolism);00220(Arginine biosynthesis);00220(Arginine biosynthesis)	K01940	EC:6.3.4.5	argininosuccinate synthase [Rattus norvegicus]	282.397	403.123	776.756	853.334	0.420541	-1.24968	0.00547681	0.199964	down	yes
ENSRNOG00000004327	Ddc	ENSRNOT00000005851;ENSRNOT00000073892;ENSRNOT00000057051	GO:0004058(aromatic-L-amino-acid decarboxylase activity);GO:0005515(protein binding);GO:0005622(intracellular);GO:0005737(cytoplasm);GO:0006520(cellular amino acid metabolic process);GO:0007623(circadian rhythm);GO:0008021(synaptic vesicle);GO:0009636(response to toxic substance);GO:0010259(multicellular organism aging);GO:0015842(aminergic neurotransmitter loading into synaptic vesicle);GO:00165…	00340(Histidine metabolism);00350(Tyrosine metabolism);00360(Phenylalanine metabolism);00380(Tryptophan metabolism);04728(Dopaminergic synapse);04726(Serotonergic synapse);05030(Cocaine addiction);05031(Amphetamine addiction);05034(Alcoholism);05034(Alcoholism)	K01593	EC:4.1.1.28	PREDICTED: aromatic-L-amino-acid decarboxylase isoform X1 [Rattus norvegicus]	5.48269	8.2824	18.064	14.7226	0.419839	-1.25209	0.00547837	0.199964	down	yes
ENSRNOG00000009954	Cacul1	ENSRNOT00000084760;ENSRNOT00000050617	GO:0000082(G1/S transition of mitotic cell cycle);GO:0005680(anaphase-promoting complex);GO:0006511(ubiquitin-dependent protein catabolic process);GO:0008284(positive regulation of cell proliferation);GO:0019901(protein kinase binding);GO:0031625(ubiquitin protein ligase binding);GO:0042787(protein ubiquitination involved in ubiquitin-dependent protein catabolic process);GO:0045860(positive regul…	NA	NA	NA	PREDICTED: CDK2-associated and cullin domain-containing protein 1 isoform X1 [Rattus norvegicus]	0.786676	0.410218	4.34804	0.778284	0.23348	-2.09863	0.00548143	0.199964	down	yes
ENSRNOG00000051854	Enpep	ENSRNOT00000087062	GO:0001525(angiogenesis);GO:0003081(regulation of systemic arterial blood pressure by renin-angiotensin);GO:0004177(aminopeptidase activity);GO:0005737(cytoplasm);GO:0005765(lysosomal membrane);GO:0005886(plasma membrane);GO:0005903(brush border);GO:0006508(proteolysis);GO:0006725(cellular aromatic compound metabolic process);GO:0008217(regulation of blood pressure);GO:0008233(peptidase activity)…	04614(Renin-angiotensin system)	K11141	EC:3.4.11.7	rCG28988, isoform CRA_a [Rattus norvegicus]	9.56765	11.8876	26.9863	22.2818	0.43548	-1.19932	0.00550045	0.20005	down	yes
ENSRNOG00000057009	LOC103693189	ENSRNOT00000079166	GO:0004725(protein tyrosine phosphatase activity);GO:0005634(nucleus);GO:0005737(cytoplasm);GO:0008138(protein tyrosine/serine/threonine phosphatase activity);GO:0009898(cytoplasmic side of plasma membrane);GO:0030335(positive regulation of cell migration);GO:0035335(peptidyl-tyrosine dephosphorylation);GO:0070062(extracellular exosome)	NA	NA	NA	protein tyrosine phosphatase type IVA 1 [Homo sapiens]	5.55426	3.23543	23.0623	7.45676	0.288006	-1.79583	0.00556655	0.201842	down	yes
ENSRNOG00000023509	Irs2	ENSRNOT00000032918	GO:0002053(positive regulation of mesenchymal cell proliferation);GO:0002903(negative regulation of B cell apoptotic process);GO:0004871(signal transducer activity);GO:0005158(insulin receptor binding);GO:0005515(protein binding);GO:0005575(cellular_component);GO:0005829(cytosol);GO:0005886(plasma membrane);GO:0007420(brain development);GO:0008283(cell proliferation);GO:0008284(positive regulatio…	04068(FoxO signaling pathway);04022(cGMP - PKG signaling pathway);04152(AMPK signaling pathway);04910(Insulin signaling pathway);04923(Regulation of lipolysis in adipocyte);04920(Adipocytokine signaling pathway);04211(Longevity regulating pathway - mammal);04213(Longevity regulating pathway - multiple species);05206(MicroRNAs in cancer);04930(Type II diabetes mellitus);04932(Non-alcoholic fatty l…	K07187	NA	insulin receptor substrate 2 [Rattus norvegicus]	5.48774	3.39196	14.2373	7.4819	0.408841	-1.29039	0.00576918	0.208559	down	yes
ENSRNOG00000061579	AABR07070810.1	ENSRNOT00000082158	GO:0000027(ribosomal large subunit assembly);GO:0003735(structural constituent of ribosome);GO:0006412(translation);GO:0019843(rRNA binding);GO:0022625(cytosolic large ribosomal subunit)	03010(Ribosome)	K02870	NA	60S ribosomal protein L12 [Rattus norvegicus]	79.4652	75.5176	39.5122	9.24058	3.17895	1.66855	0.00578846	0.208628	up	yes
ENSRNOG00000003228	Mid1ip1	ENSRNOT00000004305	GO:0005634(nucleus);GO:0005737(cytoplasm);GO:0005829(cytosol);GO:0005874(microtubule);GO:0006629(lipid metabolic process);GO:0007026(negative regulation of microtubule depolymerization);GO:0008022(protein C-terminus binding);GO:0015630(microtubule cytoskeleton);GO:0045723(positive regulation of fatty acid biosynthetic process);GO:0046890(regulation of lipid biosynthetic process);GO:0051258(protei…	NA	NA	NA	Mid1 interacting protein 1 (gastrulation specific G12-like (zebrafish)), isoform CRA_a, partial [Mus musculus]	37.3539	62.2613	25.9996	13.2074	2.54076	1.34526	0.00585533	0.209772	up	yes
ENSRNOG00000022839	Ifit3	ENSRNOT00000031025	GO:0003723(RNA binding);GO:0005737(cytoplasm);GO:0005739(mitochondrion);GO:0008285(negative regulation of cell proliferation);GO:0009615(response to virus);GO:0035457(cellular response to interferon-alpha);GO:0035458(cellular response to interferon-beta);GO:0042802(identical protein binding);GO:0043066(negative regulation of apoptotic process);GO:0051607(defense response to virus)	05160(Hepatitis C);05168(Herpes simplex infection)	K14217	NA	interferon-induced protein with tetratricopeptide repeats 3 [Rattus norvegicus]	15.7779	1.57348	1.50094	2.30432	4.55986	2.18899	0.00587873	0.209772	up	yes
ENSRNOG00000058646	Zfp36l1	ENSRNOT00000083677	GO:0000288(nuclear-transcribed mRNA catabolic process, deadenylation-dependent decay);GO:0001570(vasculogenesis);GO:0003342(proepicardium development);GO:0003677(DNA binding);GO:0003729(mRNA binding);GO:0005634(nucleus);GO:0005737(cytoplasm);GO:0005829(cytosol);GO:0006402(mRNA catabolic process);GO:0006417(regulation of translation);GO:0006915(apoptotic process);GO:0007507(heart development);GO:0…	05166(HTLV-I infection)	K15308	NA	PREDICTED: zinc finger protein 36, C3H1 type-like 1 [Bos mutus]	181.824	315.955	125.01	66.0686	2.6051	1.38134	0.00589496	0.209772	up	yes
ENSRNOG00000039891	Adgrg5	ENSRNOT00000061270	GO:0004930(G-protein coupled receptor activity);GO:0007166(cell surface receptor signaling pathway);GO:0007186(G-protein coupled receptor signaling pathway);GO:0016021(integral component of membrane)	NA	NA	NA	PREDICTED: adhesion G-protein coupled receptor G5 isoform X7 [Rattus norvegicus]	3.78084	1.11427	0.45695	0.87951	3.66275	1.87293	0.00590521	0.209772	up	yes
ENSRNOG00000004332	Egfr	ENSRNOT00000006087	GO:0001892(embryonic placenta development);GO:0003682(chromatin binding);GO:0004716(receptor signaling protein tyrosine kinase activity);GO:0005524(ATP binding);GO:0005925(focal adhesion);GO:0007173(epidermal growth factor receptor signaling pathway);GO:0007435(salivary gland morphogenesis);GO:0007611(learning or memory);GO:0008283(cell proliferation);GO:0016021(integral component of membrane);GO…	04014(Ras signaling pathway);04015(Rap1 signaling pathway);04010(MAPK signaling pathway);04012(ErbB signaling pathway);04066(HIF-1 signaling pathway);04068(FoxO signaling pathway);04020(Calcium signaling pathway);04072(Phospholipase D signaling pathway);04151(PI3K-Akt signaling pathway);04060(Cytokine-cytokine receptor interaction);04144(Endocytosis);04810(Regulation of actin cytoskeleton);04510(…	K04361	EC:2.7.10.1	epidermal growth factor receptor, isoform CRA_b [Rattus norvegicus]	4.68229	2.63025	7.45527	9.10696	0.441519	-1.17945	0.00590758	0.209772	down	yes
ENSRNOG00000029651	LOC100365958	ENSRNOT00000037218;ENSRNOT00000077912;ENSRNOT00000051075	GO:0016491(oxidoreductase activity);GO:0055114(oxidation-reduction process);GO:0001523(retinoid metabolic process);GO:0004745(retinol dehydrogenase activity);GO:0005783(endoplasmic reticulum);GO:0008202(steroid metabolic process);GO:0016229(steroid dehydrogenase activity);GO:0042572(retinol metabolic process);GO:0042573(retinoic acid metabolic process);GO:0042573(retinoic acid metabolic process)	00830(Retinol metabolism);00830(Retinol metabolism)	K11154	EC:1.1.1.-	retinol dehydrogenase 2 precursor [Rattus norvegicus]	17.662	13.6933	39.7143	30.3602	0.447456	-1.16018	0.00595415	0.210801	down	yes
ENSRNOG00000002936	Golt1a	ENSRNOT00000003918;ENSRNOT00000080486	GO:0016021(integral component of membrane);GO:0016192(vesicle-mediated transport);GO:0016192(vesicle-mediated transport)	03015(mRNA surveillance pathway);03015(mRNA surveillance pathway)	K14396	NA	vesicle transport protein GOT1A [Rattus norvegicus]	16.309	9.22004	29.9535	28.4173	0.437361	-1.1931	0.00600083	0.211829	down	yes
ENSRNOG00000009875	Akr1b7	ENSRNOT00000013423	GO:0004032(alditol:NADP+ 1-oxidoreductase activity);GO:0004033(aldo-keto reductase (NADP) activity);GO:0005739(mitochondrion);GO:0055114(oxidation-reduction process)	00040(Pentose and glucuronate interconversions);00051(Fructose and mannose metabolism);00052(Galactose metabolism);00561(Glycerolipid metabolism)	K00011	EC:1.1.1.21	aldose reductase-related protein 1 [Rattus norvegicus]	215.596	168.822	453.776	418.027	0.440946	-1.18133	0.00605133	0.212985	down	yes
ENSRNOG00000017672	Akr1c14	ENSRNOT00000023835	GO:0005737(cytoplasm);GO:0008202(steroid metabolic process);GO:0016229(steroid dehydrogenase activity);GO:0021766(hippocampus development);GO:0047042(androsterone dehydrogenase (B-specific) activity);GO:0055114(oxidation-reduction process)	00140(Steroid hormone biosynthesis);00590(Arachidonic acid metabolism);04913(Ovarian Steroidogenesis)	K04119	EC:1.1.1.51;EC:1.1.1.188	3-alpha-hydroxysteroid dehydrogenase [Rattus norvegicus]	230.523	254.124	544.828	547.659	0.443619	-1.17261	0.00609459	0.213457	down	yes
ENSRNOG00000013464	Spink1	ENSRNOT00000018110	GO:0001669(acrosomal vesicle);GO:0004867(serine-type endopeptidase inhibitor activity);GO:0005615(extracellular space);GO:0005737(cytoplasm);GO:0007204(positive regulation of cytosolic calcium ion concentration);GO:0010466(negative regulation of peptidase activity);GO:0010751(negative regulation of nitric oxide mediated signal transduction);GO:0030414(peptidase inhibitor activity);GO:0031667(resp…	04512(ECM-receptor interaction)	K06254	NA	serine protease inhibitor Kazal-type 1 precursor [Rattus norvegicus]	3.47957	1.49619	0	0.540462	9.20649	3.20265	0.0061003	0.213457	up	yes
ENSRNOG00000053201	Gpcpd1	ENSRNOT00000078070	GO:0005737(cytoplasm);GO:0005829(cytosol);GO:0006629(lipid metabolic process);GO:0007519(skeletal muscle tissue development);GO:0008889(glycerophosphodiester phosphodiesterase activity);GO:0030643(cellular phosphate ion homeostasis);GO:0046475(glycerophospholipid catabolic process);GO:0047389(glycerophosphocholine phosphodiesterase activity);GO:2001070(starch binding)	00564(Glycerophospholipid metabolism);05231(Choline metabolism in cancer)	K18695	EC:3.1.4.2	glycerophosphocholine phosphodiesterase GPCPD1 [Rattus norvegicus]	4.1204	3.96974	7.79959	10.0845	0.452365	-1.14444	0.00612749	0.213785	down	yes
ENSRNOG00000014832	Mapkapk3	ENSRNOT00000020065	GO:0000165(MAPK cascade);GO:0002224(toll-like receptor signaling pathway);GO:0004674(protein serine/threonine kinase activity);GO:0004683(calmodulin-dependent protein kinase activity);GO:0004871(signal transducer activity);GO:0005516(calmodulin binding);GO:0005524(ATP binding);GO:0005634(nucleus);GO:0005654(nucleoplasm);GO:0005737(cytoplasm);GO:0007166(cell surface receptor signaling pathway);GO:…	04010(MAPK signaling pathway);04370(VEGF signaling pathway)	K04444	EC:2.7.11.1	mitogen-activated protein kinase-activated protein kinase 3, isoform CRA_d, partial [Mus musculus]	2.85766	1.90307	5.37436	6.17611	0.412167	-1.2787	0.00621224	0.215618	down	yes
ENSRNOG00000048834	Plin3	ENSRNOT00000070978	GO:0005737(cytoplasm);GO:0005811(lipid particle);GO:0016020(membrane);GO:0043231(intracellular membrane-bounded organelle)	04923(Regulation of lipolysis in adipocyte);03320(PPAR signaling pathway)	K08768	NA	PREDICTED: perilipin-3 [Rattus norvegicus]	16.9091	14.964	35.9302	33.0551	0.462028	-1.11395	0.00621594	0.215618	down	yes
ENSRNOG00000017120	Abhd2	ENSRNOT00000023506;ENSRNOT00000090897	GO:0009611(response to wounding);GO:0016787(hydrolase activity);GO:0030336(negative regulation of cell migration);GO:0030336(negative regulation of cell migration)	NA	NA	NA	abhydrolase domain-containing protein 2 [Cricetulus griseus]	17.3106	8.80088	39.2056	23.3922	0.417131	-1.26143	0.00625278	0.216271	down	yes
ENSRNOG00000003538	Adamts4	ENSRNOT00000004713	GO:0002020(protease binding);GO:0004222(metalloendopeptidase activity);GO:0005515(protein binding);GO:0005576(extracellular region);GO:0005578(proteinaceous extracellular matrix);GO:0005615(extracellular space);GO:0006508(proteolysis);GO:0008233(peptidase activity);GO:0008237(metallopeptidase activity);GO:0008270(zinc ion binding);GO:0016787(hydrolase activity);GO:0031012(extracellular matrix);GO…	00510(N-Glycan biosynthesis);00514(Other types of O-glycan biosynthesis);00533(Glycosaminoglycan biosynthesis - keratan sulfate);00601(Glycosphingolipid biosynthesis - lacto and neolacto series)	K07968	EC:2.4.1.90;EC:2.4.1.38	a disintegrin and metallopeptidase with thrombospondin motifs 4 [Rattus norvegicus]	0.583957	0.554275	0.102712	0.2069	3.67632	1.87826	0.00641227	0.220835	up	yes
ENSRNOG00000008057	Krt7	ENSRNOT00000087481;ENSRNOT00000010660;ENSRNOT00000087370	GO:0005198(structural molecule activity);GO:0005515(protein binding);GO:0005634(nucleus);GO:0005737(cytoplasm);GO:0005882(intermediate filament);GO:0045095(keratin filament);GO:0070062(extracellular exosome);GO:0070062(extracellular exosome)	05206(MicroRNAs in cancer);05169(Epstein-Barr virus infection);05169(Epstein-Barr virus infection)	K07606	NA	PREDICTED: keratin, type II cytoskeletal 7 [Rattus norvegicus]	1.86402	2.27871	0.112816	0.78582	4.61002	2.20477	0.00642153	0.220835	up	yes
ENSRNOG00000049714	Asap3	ENSRNOT00000072864	GO:0001726(ruffle);GO:0005096(GTPase activator activity);GO:0005925(focal adhesion);GO:0016477(cell migration);GO:0043547(positive regulation of GTPase activity);GO:0051492(regulation of stress fiber assembly)	04144(Endocytosis);04666(Fc gamma R-mediated phagocytosis)	K12488	NA	PREDICTED: arf-GAP with SH3 domain, ANK repeat and PH domain-containing protein 3 isoform X2 [Rattus norvegicus]	7.19975	6.83257	3.05461	3.24368	2.22796	1.15572	0.00644337	0.22093	up	yes
ENSRNOG00000014314	Slc39a4	ENSRNOT00000040422;ENSRNOT00000071522	GO:0003674(molecular_function);GO:0005385(zinc ion transmembrane transporter activity);GO:0005575(cellular_component);GO:0005768(endosome);GO:0005886(plasma membrane);GO:0005887(integral component of plasma membrane);GO:0006829(zinc II ion transport);GO:0006882(cellular zinc ion homeostasis);GO:0008150(biological_process);GO:0016021(integral component of membrane);GO:0016023(cytoplasmic, membrane…	04978(Mineral absorption);04978(Mineral absorption)	K14710	NA	zinc transporter ZIP4 precursor [Rattus norvegicus]	2.2576	2.45353	6.28681	5.24197	0.40864	-1.2911	0.00646112	0.22093	down	yes
ENSRNOG00000021573	Dpy19l3	ENSRNOT00000039115	GO:0000030(mannosyltransferase activity);GO:0005637(nuclear inner membrane);GO:0016021(integral component of membrane);GO:0018406(protein C-linked glycosylation via 2'-alpha-mannosyl-L-tryptophan)	04740(Olfactory transduction)	K04257	NA	probable C-mannosyltransferase DPY19L3 [Rattus norvegicus]	5.50563	5.79911	9.4423	16.9764	0.427907	-1.22463	0.00653144	0.2227	down	yes
ENSRNOG00000042771	Apol3	ENSRNOT00000068221;ENSRNOT00000089135	GO:0004871(signal transducer activity);GO:0005576(extracellular region);GO:0006869(lipid transport);GO:0008289(lipid binding);GO:0016020(membrane);GO:0042157(lipoprotein metabolic process);GO:0043123(positive regulation of I-kappaB kinase/NF-kappaB signaling);GO:0043123(positive regulation of I-kappaB kinase/NF-kappaB signaling)	05143(African trypanosomiasis);05143(African trypanosomiasis)	K14480	NA	apolipoprotein L, 3 [Rattus norvegicus]	48.1579	19.9991	16.4279	4.45617	3.26358	1.70646	0.00661306	0.224844	up	yes
ENSRNOG00000054946	AABR07054126.1	ENSRNOT00000082746;ENSRNOT00000079859;ENSRNOT00000084175	NA	NA	NA	NA		0.649579	0.655371	2.95914	1.18085	0.315206	-1.66563	0.00666894	0.226103	down	yes
ENSRNOG00000023446	Btbd8	ENSRNOT00000037931	GO:0005654(nucleoplasm)	NA	NA	NA	PREDICTED: uncharacterized protein KIAA1107 isoform X1 [Rattus norvegicus]	0.363803	1.43962	0.19024	0.22601	4.33255	2.11522	0.00674526	0.228041	up	yes
ENSRNOG00000032844	RT1-Da	ENSRNOT00000048332;ENSRNOT00000077630;ENSRNOT00000081202	GO:0002503(peptide antigen assembly with MHC class II protein complex);GO:0002504(antigen processing and presentation of peptide or polysaccharide antigen via MHC class II);GO:0002506(polysaccharide assembly with MHC class II protein complex);GO:0003674(molecular_function);GO:0005575(cellular_component);GO:0005764(lysosome);GO:0005765(lysosomal membrane);GO:0005886(plasma membrane);GO:0006955(imm…	04514(Cell adhesion molecules (CAMs));04145(Phagosome);04640(Hematopoietic cell lineage);04612(Antigen processing and presentation);04672(Intestinal immune network for IgA production);05310(Asthma);05322(Systemic lupus erythematosus);05323(Rheumatoid arthritis);05320(Autoimmune thyroid disease);05321(Inflammatiory bowel disease (IBD));05330(Allograft rejection);05332(Graft-versus-host disease);05…	K06752	NA	h-2 class II histocompatibility antigen, E-K alpha chain-like protein [Cricetulus griseus]	9.06312	9.874	20.471	20.3525	0.463878	-1.10818	0.00679166	0.228041	down	yes
ENSRNOG00000004280	Tcn2	ENSRNOT00000005934	GO:0005615(extracellular space);GO:0006824(cobalt ion transport);GO:0015889(cobalamin transport);GO:0031419(cobalamin binding);GO:0046872(metal ion binding);GO:0070062(extracellular exosome)	04977(Vitamin digestion and absorption)	K14619	NA	transcobalamin-2 precursor [Rattus norvegicus]	27.0423	16.2429	40.0371	58.6107	0.438785	-1.18841	0.0068017	0.228041	down	yes
ENSRNOG00000010775	Arrdc4	ENSRNOT00000077479;ENSRNOT00000051402	GO:0005768(endosome);GO:0005769(early endosome);GO:0005886(plasma membrane);GO:0016023(cytoplasmic, membrane-bounded vesicle);GO:0051443(positive regulation of ubiquitin-protein transferase activity);GO:0051443(positive regulation of ubiquitin-protein transferase activity)	NA	NA	NA	arrestin domain-containing protein 4 [Rattus norvegicus]	4.88346	7.20378	2.74998	2.7275	2.20671	1.1419	0.00682264	0.228041	up	yes
ENSRNOG00000058904	AABR07040847.1	ENSRNOT00000087403	GO:0008270(zinc ion binding)	NA	NA	NA	PREDICTED: testis-expressed sequence 13B protein isoform X3 [Rattus norvegicus]	2.8403	1.13735	0.024523	0.580376	6.57574	2.71715	0.00682534	0.228041	up	yes
ENSRNOG00000047657	C4a	ENSRNOT00000078871;ENSRNOT00000072377;ENSRNOT00000083833	GO:0001848(complement binding);GO:0001849(complement component C1q binding);GO:0003674(molecular_function);GO:0004866(endopeptidase inhibitor activity);GO:0005615(extracellular space);GO:0006954(inflammatory response);GO:0006956(complement activation);GO:0008150(biological_process);GO:0010951(negative regulation of endopeptidase activity);GO:0016064(immunoglobulin mediated immune response);GO:003…	04610(Complement and coagulation cascades);05322(Systemic lupus erythematosus);05133(Pertussis);05150(Staphylococcus aureus infection);05150(Staphylococcus aureus infection)	K03989	NA	complement C4 precursor [Rattus norvegicus]	56.9182	41.751	22.2023	23.0527	2.18029	1.12452	0.00684504	0.228041	up	yes
ENSRNOG00000015519	Ces1d	ENSRNOT00000021812;ENSRNOT00000090865;ENSRNOT00000078874	GO:0004771(sterol esterase activity);GO:0004806(triglyceride lipase activity);GO:0005615(extracellular space);GO:0005788(endoplasmic reticulum lumen);GO:0005811(lipid particle);GO:0005829(cytosol);GO:0016042(lipid catabolic process);GO:0016787(hydrolase activity);GO:0019626(short-chain fatty acid catabolic process);GO:0030339(fatty-acyl-ethyl-ester synthase activity);GO:0030855(epithelial cell di…	00983(Drug metabolism - other enzymes);00983(Drug metabolism - other enzymes)	K01044	EC:3.1.1.1	RecName: Full=Carboxylesterase 1D; AltName: Full=Carboxyesterase ES-10; AltName: Full=Carboxylesterase 3; AltName: Full=ES-HVEL; AltName: Full=Fatty acid ethyl ester synthase; Short=FAEE synthase; AltName: Full=Liver carboxylesterase 10; AltName: Full=pI 6.1 esterase; Flags: Precursor	29.092	26.5369	78.0059	49.6147	0.435893	-1.19796	0.00686464	0.228041	down	yes
ENSRNOG00000009867	Tgfb3	ENSRNOT00000013516	GO:0000187(activation of MAPK activity);GO:0001666(response to hypoxia);GO:0001701(in utero embryonic development);GO:0005114(type II transforming growth factor beta receptor binding);GO:0005125(cytokine activity);GO:0005160(transforming growth factor beta receptor binding);GO:0005578(proteinaceous extracellular matrix);GO:0005615(extracellular space);GO:0005634(nucleus);GO:0005737(cytoplasm);GO:…	04010(MAPK signaling pathway);04350(TGF-beta signaling pathway);04390(Hippo signaling pathway);04068(FoxO signaling pathway);04060(Cytokine-cytokine receptor interaction);04144(Endocytosis);04110(Cell cycle);05200(Pathways in cancer);05210(Colorectal cancer);05212(Pancreatic cancer);05220(Chronic myeloid leukemia);05211(Renal cell carcinoma);05323(Rheumatoid arthritis);05321(Inflammatiory bowel d…	K13377	NA	transforming growth factor beta-3 preproprotein [Rattus norvegicus]	1.15776	0.588701	2.15396	3.02766	0.33705	-1.56897	0.00687809	0.228041	down	yes
ENSRNOG00000008061	Nuak1	ENSRNOT00000010636	GO:0002039(p53 binding);GO:0004674(protein serine/threonine kinase activity);GO:0005524(ATP binding);GO:0005634(nucleus);GO:0005730(nucleolus);GO:0005737(cytoplasm);GO:0006468(protein phosphorylation);GO:0015630(microtubule cytoskeleton);GO:0030155(regulation of cell adhesion);GO:0035507(regulation of myosin-light-chain-phosphatase activity);GO:0035556(intracellular signal transduction);GO:200077…	04068(FoxO signaling pathway);04150(mTOR signaling pathway);04140(Regulation of autophagy);04931(Insulin resistance)	K07198	EC:2.7.11.11	ZNUAK family, SNF1-like kinase, 1, partial [Mus musculus]	2.29774	2.24716	1.08606	0.752131	2.47249	1.30596	0.00693576	0.22932	up	yes
ENSRNOG00000016041	Zc3h12d	ENSRNOT00000065646	GO:0000932(cytoplasmic mRNA processing body);GO:0005634(nucleus);GO:0005737(cytoplasm);GO:0006402(mRNA catabolic process);GO:0030308(negative regulation of cell growth);GO:0042130(negative regulation of T cell proliferation);GO:0046872(metal ion binding);GO:0061158(3'-UTR-mediated mRNA destabilization);GO:2000134(negative regulation of G1/S transition of mitotic cell cycle)	NA	NA	NA	probable ribonuclease ZC3H12D [Rattus norvegicus]	2.85211	1.01482	0.482903	0.733256	3.17963	1.66886	0.00709508	0.233943	up	yes
ENSRNOG00000001990	Ugt2b17	ENSRNOT00000002724;ENSRNOT00000002728;ENSRNOT00000089471	GO:0005789(endoplasmic reticulum membrane);GO:0015020(glucuronosyltransferase activity);GO:0016021(integral component of membrane);GO:0016758(transferase activity, transferring hexosyl groups);GO:0017144(drug metabolic process);GO:0032496(response to lipopolysaccharide);GO:0043231(intracellular membrane-bounded organelle);GO:0070980(biphenyl catabolic process);GO:0071361(cellular response to etha…	00040(Pentose and glucuronate interconversions);00053(Ascorbate and aldarate metabolism);00500(Starch and sucrose metabolism);00140(Steroid hormone biosynthesis);00830(Retinol metabolism);00860(Porphyrin and chlorophyll metabolism);00980(Metabolism of xenobiotics by cytochrome P450);00982(Drug metabolism - cytochrome P450);00983(Drug metabolism - other enzymes);05204(Chemical carcinogenesis);0520…	K00699	EC:2.4.1.17	UDP-glucuronosyltransferase 2B10 precursor [Rattus norvegicus]	13.3405	14.0875	33.5567	27.0688	0.452418	-1.14427	0.00713531	0.234625	down	yes
ENSRNOG00000015253	Hsf4	ENSRNOT00000075933;ENSRNOT00000076335;ENSRNOT00000065013	GO:0000122(negative regulation of transcription from RNA polymerase II promoter);GO:0000977(RNA polymerase II regulatory region sequence-specific DNA binding);GO:0001227(transcriptional repressor activity, RNA polymerase II transcription regulatory region sequence-specific binding);GO:0001228(transcriptional activator activity, RNA polymerase II transcription regulatory region sequence-specific b…	05134(Legionellosis);05134(Legionellosis)	K09414	NA	PREDICTED: heat shock factor protein 4 isoform X1 [Rattus norvegicus]	2.66688	3.86563	0.144751	1.27754	4.59295	2.19942	0.00715987	0.234789	up	yes
ENSRNOG00000000900	Tpst1	ENSRNOT00000084968;ENSRNOT00000065868;ENSRNOT00000001200	GO:0000139(Golgi membrane);GO:0005794(Golgi apparatus);GO:0006478(peptidyl-tyrosine sulfation);GO:0008476(protein-tyrosine sulfotransferase activity);GO:0016021(integral component of membrane);GO:0016021(integral component of membrane)	NA	NA	NA	protein-tyrosine sulfotransferase 1 [Rattus norvegicus]	11.0277	9.95774	28.3807	18.3124	0.449434	-1.15382	0.00727585	0.236899	down	yes
ENSRNOG00000023433	Gata6	ENSRNOT00000081399;ENSRNOT00000030726	GO:0000122(negative regulation of transcription from RNA polymerase II promoter);GO:0000977(RNA polymerase II regulatory region sequence-specific DNA binding);GO:0000979(RNA polymerase II core promoter sequence-specific DNA binding);GO:0000981(RNA polymerase II transcription factor activity, sequence-specific DNA binding);GO:0001085(RNA polymerase II transcription factor binding);GO:0001103(RNA p…	04022(cGMP - PKG signaling pathway);04919(Thyroid hormone signaling pathway);04919(Thyroid hormone signaling pathway)	K09183	NA	transcription factor GATA-6 [Rattus norvegicus]	4.88696	4.59683	2.12679	1.71882	2.46614	1.30225	0.00729861	0.236899	up	yes
ENSRNOG00000007545	Angptl4	ENSRNOT00000010031	GO:0001525(angiogenesis);GO:0001666(response to hypoxia);GO:0004857(enzyme inhibitor activity);GO:0005576(extracellular region);GO:0005578(proteinaceous extracellular matrix);GO:0005615(extracellular space);GO:0019216(regulation of lipid metabolic process);GO:0030154(cell differentiation);GO:0042802(identical protein binding);GO:0043066(negative regulation of apoptotic process);GO:0043086(negativ…	03320(PPAR signaling pathway)	K08767	NA	angiopoietin-related protein 4 precursor [Rattus norvegicus]	123.939	162.801	43.5573	81.9493	2.28467	1.19198	0.00729877	0.236899	up	yes
ENSRNOG00000023969	Herc6	ENSRNOT00000058626	GO:0002244(hematopoietic progenitor cell differentiation);GO:0004842(ubiquitin-protein transferase activity);GO:0005634(nucleus);GO:0005737(cytoplasm);GO:0016874(ligase activity);GO:0042787(protein ubiquitination involved in ubiquitin-dependent protein catabolic process)	04120(Ubiquitin mediated proteolysis)	K10615	EC:2.3.2.26	Herc6 protein, partial [Rattus norvegicus]	15.6018	2.24619	1.6778	3.20958	3.65185	1.86863	0.00731698	0.236899	up	yes
ENSRNOG00000059984	Dll1	ENSRNOT00000080429	GO:0001709(cell fate determination);GO:0001756(somitogenesis);GO:0001757(somite specification);GO:0001947(heart looping);GO:0002315(marginal zone B cell differentiation);GO:0003323(type B pancreatic cell development);GO:0005112(Notch binding);GO:0005509(calcium ion binding);GO:0005515(protein binding);GO:0005886(plasma membrane);GO:0005912(adherens junction);GO:0007219(Notch signaling pathway);GO…	04330(Notch signaling pathway)	K06051	NA	delta-like 1 (Drosophila) [Rattus norvegicus]	2.91129	3.38722	1.34025	1.29118	2.39357	1.25917	0.00732291	0.236899	up	yes
ENSRNOG00000061774	AABR07002910.1	ENSRNOT00000079616	GO:0000776(kinetochore);GO:0000777(condensed chromosome kinetochore);GO:0004672(protein kinase activity);GO:0005515(protein binding);GO:0005524(ATP binding);GO:0005623(cell);GO:0005737(cytoplasm);GO:0006468(protein phosphorylation);GO:0007094(mitotic spindle assembly checkpoint);GO:0007140(male meiosis);GO:0008608(attachment of spindle microtubules to kinetochore);GO:0019901(protein kinase bindin…	00330(Arginine and proline metabolism)	K11394	EC:1.5.-.-	PREDICTED: inactive serine/threonine-protein kinase TEX14-like isoform X6 [Rattus norvegicus]	1.86848	2.22899	0.488292	0.945317	2.85815	1.51508	0.0074089	0.238448	up	yes
ENSRNOG00000017248	Prkag3	ENSRNOT00000023365	GO:0004679(AMP-activated protein kinase activity);GO:0005615(extracellular space);GO:0005978(glycogen biosynthetic process);GO:0006468(protein phosphorylation);GO:0015758(glucose transport);GO:0019901(protein kinase binding);GO:0031588(nucleotide-activated protein kinase complex)	04068(FoxO signaling pathway);04152(AMPK signaling pathway);04910(Insulin signaling pathway);04922(Glucagon signaling pathway);04920(Adipocytokine signaling pathway);04921(Oxytocin signaling pathway);04211(Longevity regulating pathway - mammal);04213(Longevity regulating pathway - multiple species);04710(Circadian rhythm);05410(Hypertrophic cardiomyopathy (HCM));04932(Non-alcoholic fatty liver di…	K07200	NA	5'-AMP-activated protein kinase subunit gamma-3 [Rattus norvegicus]	0.231789	0.220644	0.617413	1.17634	0.252228	-1.9872	0.00743225	0.238448	down	yes
ENSRNOG00000001389	Irs3	ENSRNOT00000001874	GO:0004871(signal transducer activity);GO:0008286(insulin receptor signaling pathway);GO:0019216(regulation of lipid metabolic process);GO:0043548(phosphatidylinositol 3-kinase binding)	04068(FoxO signaling pathway);04022(cGMP - PKG signaling pathway);04152(AMPK signaling pathway);04910(Insulin signaling pathway);04923(Regulation of lipolysis in adipocyte);04920(Adipocytokine signaling pathway);04211(Longevity regulating pathway - mammal);04213(Longevity regulating pathway - multiple species);04930(Type II diabetes mellitus)	K17445	NA	PREDICTED: insulin receptor substrate 3 isoform X1 [Rattus norvegicus]	2.83965	7.8486	2.23997	1.17683	3.12815	1.64531	0.00744909	0.238448	up	yes
ENSRNOG00000010960	Ankh	ENSRNOT00000068484	GO:0003674(molecular_function);GO:0005315(inorganic phosphate transmembrane transporter activity);GO:0005575(cellular_component);GO:0005886(plasma membrane);GO:0005887(integral component of plasma membrane);GO:0006817(phosphate ion transport);GO:0008150(biological_process);GO:0015114(phosphate ion transmembrane transporter activity);GO:0016021(integral component of membrane);GO:0030500(regulation…	NA	NA	NA	PREDICTED: progressive ankylosis protein homolog [Macaca nemestrina]	3.77651	2.90745	7.70944	7.48112	0.440008	-1.1844	0.00745027	0.238448	down	yes
ENSRNOG00000043304	Apcdd1	ENSRNOT00000067554	GO:0001942(hair follicle development);GO:0005887(integral component of plasma membrane);GO:0017147(Wnt-protein binding);GO:0030178(negative regulation of Wnt signaling pathway);GO:0043615(astrocyte cell migration)	NA	NA	NA	PREDICTED: protein APCDD1 [Rattus norvegicus]	0.042423	0.158059	0.489268	0.532633	0.196185	-2.34971	0.00759024	0.242282	down	yes
ENSRNOG00000000748	AABR07044273.1	ENSRNOT00000000975	GO:0003779(actin binding);GO:0005737(cytoplasm);GO:0015629(actin cytoskeleton);GO:0030042(actin filament depolymerization);GO:0030836(positive regulation of actin filament depolymerization);GO:0030864(cortical actin cytoskeleton);GO:0051014(actin filament severing);GO:0070062(extracellular exosome)	04810(Regulation of actin cytoskeleton);04666(Fc gamma R-mediated phagocytosis);04360(Axon guidance);05133(Pertussis)	K05765	NA	PREDICTED: destrin [Rattus norvegicus]	1.53688	0.366427	5.72927	3.20937	0.21293	-2.23155	0.00765344	0.243564	down	yes
ENSRNOG00000045747	Capns1	ENSRNOT00000072756	GO:0004198(calcium-dependent cysteine-type endopeptidase activity);GO:0005509(calcium ion binding);GO:0005515(protein binding);GO:0005737(cytoplasm);GO:0005829(cytosol);GO:0005886(plasma membrane);GO:0006508(proteolysis);GO:0016020(membrane);GO:0046982(protein heterodimerization activity);GO:0070062(extracellular exosome)	00564(Glycerophospholipid metabolism);00566(Ether lipid metabolism)	K13510	EC:2.3.1.23;EC:2.3.1.67	calpain small subunit 1 [Rattus norvegicus]	12.6769	12.8271	27.851	28.7141	0.450878	-1.14919	0.00767097	0.243564	down	yes
ENSRNOG00000004284	Btg1	ENSRNOT00000005910	GO:0005515(protein binding);GO:0005634(nucleus);GO:0005737(cytoplasm);GO:0006479(protein methylation);GO:0006979(response to oxidative stress);GO:0007283(spermatogenesis);GO:0007286(spermatid development);GO:0008285(negative regulation of cell proliferation);GO:0019899(enzyme binding);GO:0043434(response to peptide hormone);GO:0045603(positive regulation of endothelial cell differentiation);GO:00…	03018(RNA degradation)	K14443	NA	B-cell translocation gene 1, anti-proliferative, isoform CRA_a, partial [Homo sapiens]	143.069	105.255	65.4655	46.7088	2.21374	1.14648	0.00771477	0.244308	up	yes
ENSRNOG00000013828	Sirt3	ENSRNOT00000018861	GO:0005743(mitochondrial inner membrane);GO:0005759(mitochondrial matrix);GO:0008270(zinc ion binding);GO:0009060(aerobic respiration);GO:0032041(NAD-dependent histone deacetylase activity (H3-K14 specific));GO:0034983(peptidyl-lysine deacetylation);GO:0070403(NAD+ binding);GO:0070932(histone H3 deacetylation);GO:2000757(negative regulation of peptidyl-lysine acetylation)	05230(Central carbon metabolism in cancer)	K11413	EC:3.5.1.-	PREDICTED: NAD-dependent protein deacetylase sirtuin-3, mitochondrial isoform X1 [Rattus norvegicus]	20.8298	26.2582	11.8471	10.521	2.10514	1.07392	0.00779965	0.246346	up	yes
ENSRNOG00000000903	Asl	ENSRNOT00000001211	GO:0000050(urea cycle);GO:0000053(argininosuccinate metabolic process);GO:0001822(kidney development);GO:0001889(liver development);GO:0004056(argininosuccinate lyase activity);GO:0005634(nucleus);GO:0005737(cytoplasm);GO:0005741(mitochondrial outer membrane);GO:0005783(endoplasmic reticulum);GO:0005829(cytosol);GO:0006475(internal protein amino acid acetylation);GO:0006520(cellular amino acid me…	01230(Biosynthesis of amino acids);00250(Alanine, aspartate and glutamate metabolism);00220(Arginine biosynthesis)	K01755	EC:4.3.2.1	argininosuccinate lyase [Rattus norvegicus]	112.247	148.169	273.313	320.564	0.438502	-1.18935	0.00791396	0.2493	down	yes
ENSRNOG00000061778	AABR07035780.6	ENSRNOT00000083323	GO:2000359(regulation of binding of sperm to zona pellucida)	NA	NA	NA	PREDICTED: zonadhesin isoform X2 [Rattus norvegicus]	2.23287	2.22219	0.441062	0.826115	3.51574	1.81383	0.00799041	0.250688	up	yes
ENSRNOG00000056970	AABR07063425.3	ENSRNOT00000087960	GO:0006355(regulation of transcription, DNA-templated);GO:0016021(integral component of membrane)	NA	NA	NA	Aa1-330 [Rattus norvegicus]	2.59301	4.30569	0.380672	1.14696	4.51594	2.17502	0.00799978	0.250688	up	yes
ENSRNOG00000038948	Stab2	ENSRNOT00000059538	GO:0005041(low-density lipoprotein receptor activity);GO:0005044(scavenger receptor activity);GO:0005509(calcium ion binding);GO:0005540(hyaluronic acid binding);GO:0005737(cytoplasm);GO:0005887(integral component of plasma membrane);GO:0006897(endocytosis);GO:0006898(receptor-mediated endocytosis);GO:0007155(cell adhesion);GO:0009897(external side of plasma membrane);GO:0010468(regulation of gen…	NA	NA	NA	stabilin-2 precursor [Rattus norvegicus]	1.37217	1.34197	3.42915	2.57573	0.451988	-1.14564	0.00811615	0.253672	down	yes
ENSRNOG00000019077	Lipa	ENSRNOT00000025845;ENSRNOT00000078279	GO:0000902(cell morphogenesis);GO:0001816(cytokine production);GO:0004771(sterol esterase activity);GO:0005764(lysosome);GO:0006631(fatty acid metabolic process);GO:0006954(inflammatory response);GO:0008283(cell proliferation);GO:0016042(lipid catabolic process);GO:0016125(sterol metabolic process);GO:0016298(lipase activity);GO:0030324(lung development);GO:0048771(tissue remodeling);GO:0048873(h…	00100(Steroid biosynthesis);04142(Lysosome);04142(Lysosome)	K01052	EC:3.1.1.13	lysosomal acid lipase/cholesteryl ester hydrolase precursor [Rattus norvegicus]	31.7454	28.5063	66.1613	63.3714	0.465147	-1.10424	0.00819414	0.254397	down	yes
ENSRNOG00000021892	Ccdc38	ENSRNOT00000030985	GO:0005813(centrosome)	00340(Histidine metabolism)	K01468	EC:3.5.2.7	PREDICTED: coiled-coil domain-containing protein 38 isoform X3 [Rattus norvegicus]	4.70983	4.5332	2.22109	1.45813	2.51223	1.32897	0.00819739	0.254397	up	yes
ENSRNOG00000006019	G0s2	ENSRNOT00000007879	GO:0005739(mitochondrion);GO:0097191(extrinsic apoptotic signaling pathway);GO:2001238(positive regulation of extrinsic apoptotic signaling pathway)	NA	NA	NA	G0/G1 switch protein 2 [Rattus norvegicus]	308.174	125.276	75.8187	103.093	2.42271	1.27662	0.00820292	0.254397	up	yes
ENSRNOG00000020578	Ceacam1	ENSRNOT00000090629;ENSRNOT00000051892;ENSRNOT00000029487	GO:0001558(regulation of cell growth);GO:0001618(virus receptor activity);GO:0001818(negative regulation of cytokine production);GO:0001915(negative regulation of T cell mediated cytotoxicity);GO:0005130(granulocyte colony-stimulating factor receptor binding);GO:0005515(protein binding);GO:0005516(calmodulin binding);GO:0005615(extracellular space);GO:0005886(plasma membrane);GO:0005887(integral …	NA	NA	NA	carcinoembryonic antigen-related cell adhesion molecule 1 isoform 2 precursor [Rattus norvegicus]	11.2826	12.506	21.4838	30.9125	0.454013	-1.1392	0.00823712	0.254799	down	yes
ENSRNOG00000012835	Espl1	ENSRNOT00000017314	GO:0000070(mitotic sister chromatid segregation);GO:0000212(meiotic spindle organization);GO:0004197(cysteine-type endopeptidase activity);GO:0005634(nucleus);GO:0005737(cytoplasm);GO:0005813(centrosome);GO:0006508(proteolysis);GO:0007059(chromosome segregation);GO:0007067(mitotic nuclear division);GO:0007127(meiosis I);GO:0008233(peptidase activity);GO:0008234(cysteine-type peptidase activity);G…	04110(Cell cycle);04114(Oocyte meiosis)	K02365	EC:3.4.22.49	separin [Rattus norvegicus]	0.195299	0.244617	0.03232	0.072797	4.18501	2.06523	0.00847541	0.261496	up	yes
ENSRNOG00000013291	Cyp2c23	ENSRNOT00000017840	GO:0004497(monooxygenase activity);GO:0005506(iron ion binding);GO:0005789(endoplasmic reticulum membrane);GO:0008392(arachidonic acid epoxygenase activity);GO:0008395(steroid hydroxylase activity);GO:0016705(oxidoreductase activity, acting on paired donors, with incorporation or reduction of molecular oxygen);GO:0019369(arachidonic acid metabolic process);GO:0019373(epoxygenase P450 pathway);GO:…	00140(Steroid hormone biosynthesis);00590(Arachidonic acid metabolism);00591(Linoleic acid metabolism);00830(Retinol metabolism);04726(Serotonergic synapse);04750(Inflammatory mediator regulation of TRP channels);05204(Chemical carcinogenesis)	K07413	EC:1.14.14.1	cytochrome P450 2C23 [Rattus norvegicus]	233.115	277.351	533.929	610.75	0.445947	-1.16505	0.00852236	0.261638	down	yes
ENSRNOG00000018606	Olr59	ENSRNOT00000025097	GO:0003707(steroid hormone receptor activity);GO:0004930(G-protein coupled receptor activity);GO:0004984(olfactory receptor activity);GO:0005886(plasma membrane);GO:0007165(signal transduction);GO:0007186(G-protein coupled receptor signaling pathway);GO:0016021(integral component of membrane);GO:0038023(signaling receptor activity);GO:0043401(steroid hormone mediated signaling pathway);GO:0045777…	04740(Olfactory transduction)	K04257	NA	PREDICTED: olfactory receptor 51E2 isoform X1 [Rattus norvegicus]	4.93451	7.56263	1.05048	3.52227	2.73296	1.45046	0.00852363	0.261638	up	yes
ENSRNOG00000006649	Thrb	ENSRNOT00000008752;ENSRNOT00000008989;ENSRNOT00000085322;ENSRNOT00000061402	GO:0000122(negative regulation of transcription from RNA polymerase II promoter);GO:0000790(nuclear chromatin);GO:0003677(DNA binding);GO:0003690(double-stranded DNA binding);GO:0003700(transcription factor activity, sequence-specific DNA binding);GO:0003707(steroid hormone receptor activity);GO:0004887(thyroid hormone receptor activity);GO:0005515(protein binding);GO:0005634(nucleus);GO:0006351(…	04080(Neuroactive ligand-receptor interaction);04919(Thyroid hormone signaling pathway);04919(Thyroid hormone signaling pathway)	K08362	NA	thyroid hormone receptor beta2delta [Rattus norvegicus]	1.62197	1.88943	3.28709	4.36435	0.45892	-1.12369	0.00867918	0.265733	down	yes
ENSRNOG00000046667	Fosb	ENSRNOT00000091687;ENSRNOT00000072149	GO:0000978(RNA polymerase II core promoter proximal region sequence-specific DNA binding);GO:0001077(transcriptional activator activity, RNA polymerase II core promoter proximal region sequence-specific binding);GO:0003677(DNA binding);GO:0003690(double-stranded DNA binding);GO:0003700(transcription factor activity, sequence-specific DNA binding);GO:0005634(nucleus);GO:0006357(regulation of trans…	04380(Osteoclast differentiation);05030(Cocaine addiction);05031(Amphetamine addiction);05034(Alcoholism);05034(Alcoholism)	K09029	NA	protein fosB [Rattus norvegicus]	1.21203	1.44994	0.463624	0.0389054	5.29714	2.40521	0.00879696	0.268654	up	yes
ENSRNOG00000060693	Catsperg	ENSRNOT00000087411	GO:0036128(CatSper complex);GO:0097228(sperm principal piece)	NA	NA	NA	PREDICTED: cation channel sperm-associated protein subunit gamma isoform X3 [Rattus norvegicus]	3.7735	5.01854	1.69139	2.27197	2.21833	1.14947	0.00892529	0.271646	up	yes
ENSRNOG00000015157	Smtnl2	ENSRNOT00000020379	GO:0003674(molecular_function);GO:0005575(cellular_component);GO:0008150(biological_process)	04810(Regulation of actin cytoskeleton);04510(Focal adhesion);04520(Adherens junction);04530(Tight junction)	K05699	NA	smoothelin-like protein 2 [Rattus norvegicus]	0.719905	1.24632	0.330503	0.166949	3.95259	1.9828	0.00894018	0.271646	up	yes
ENSRNOG00000005930	Nnmt	ENSRNOT00000007789	GO:0001887(selenium compound metabolic process);GO:0003674(molecular_function);GO:0005829(cytosol);GO:0008112(nicotinamide N-methyltransferase activity);GO:0010243(response to organonitrogen compound);GO:0031100(organ regeneration);GO:0032259(methylation);GO:0042493(response to drug);GO:0098603(selenol Se-methyltransferase activity)	00760(Nicotinate and nicotinamide metabolism)	K00541	EC:2.1.1.1	nicotinamide N-methyltransferase [Rattus norvegicus]	20.532	14.9054	23.6314	64.0329	0.404239	-1.30672	0.00909871	0.275114	down	yes
ENSRNOG00000014371	Cdh13	ENSRNOT00000019298	GO:0000278(mitotic cell cycle);GO:0001938(positive regulation of endothelial cell proliferation);GO:0001954(positive regulation of cell-matrix adhesion);GO:0002040(sprouting angiogenesis);GO:0003674(molecular_function);GO:0005509(calcium ion binding);GO:0005615(extracellular space);GO:0005737(cytoplasm);GO:0005886(plasma membrane);GO:0005901(caveola);GO:0005925(focal adhesion);GO:0007156(homophil…	04514(Cell adhesion molecules (CAMs));05412(Arrhythmogenic right ventricular cardiomyopathy (ARVC))	K06736	NA	cadherin-13 precursor [Rattus norvegicus]	0.0659349	0.0788405	0.298275	0.328477	0.230993	-2.11408	0.00910017	0.275114	down	yes
ENSRNOG00000008283	B4galt5	ENSRNOT00000064849;ENSRNOT00000079414	GO:0005975(carbohydrate metabolic process);GO:0016757(transferase activity, transferring glycosyl groups);GO:0070062(extracellular exosome);GO:0070062(extracellular exosome)	00512(Mucin type O-glycan biosynthesis);00512(Mucin type O-glycan biosynthesis)	K09905	EC:2.4.1.-	beta-1,4-galactosyltransferase 5 [Mus musculus]	4.46238	5.63481	2.50366	1.80997	2.34077	1.22698	0.00913396	0.275442	up	yes
ENSRNOG00000030729	C4b	ENSRNOT00000031704	GO:0001848(complement binding);GO:0001849(complement component C1q binding);GO:0003674(molecular_function);GO:0004866(endopeptidase inhibitor activity);GO:0005615(extracellular space);GO:0006954(inflammatory response);GO:0006956(complement activation);GO:0008150(biological_process);GO:0010951(negative regulation of endopeptidase activity);GO:0016064(immunoglobulin mediated immune response);GO:003…	04610(Complement and coagulation cascades);05322(Systemic lupus erythematosus);05133(Pertussis);05150(Staphylococcus aureus infection)	K03989	NA	complement component 4, gene 2 precursor [Rattus norvegicus]	345.36	128.888	103.765	84.1779	2.52336	1.33535	0.0092186	0.277164	up	yes
ENSRNOG00000024677	Arhgap33	ENSRNOT00000034001	GO:0005096(GTPase activator activity);GO:0005737(cytoplasm);GO:0005886(plasma membrane);GO:0007165(signal transduction);GO:0035091(phosphatidylinositol binding)	05200(Pathways in cancer);05220(Chronic myeloid leukemia)	K08878	EC:2.7.11.1	PREDICTED: rho GTPase-activating protein 33 isoform X1 [Rattus norvegicus]	12.9357	13.9285	4.44479	8.19072	2.12609	1.0882	0.00923728	0.277164	up	yes
ENSRNOG00000012442	Cemip	ENSRNOT00000036343	GO:0004415(hyalurononglucosaminidase activity);GO:0005540(hyaluronic acid binding);GO:0005737(cytoplasm);GO:0005783(endoplasmic reticulum);GO:0005886(plasma membrane);GO:0007605(sensory perception of sound);GO:0010800(positive regulation of peptidyl-threonine phosphorylation);GO:0030214(hyaluronan catabolic process);GO:0030335(positive regulation of cell migration);GO:0030665(clathrin-coated vesi…	00514(Other types of O-glycan biosynthesis)	K09666	EC:2.4.1.-	PREDICTED: cell migration-inducing and hyaluronan-binding protein isoform X1 [Rattus norvegicus]	0.954026	1.23825	0.347276	0.500771	2.58509	1.37021	0.0095511	0.285866	up	yes
ENSRNOG00000045924	RT1-T24-3	ENSRNOT00000070903;ENSRNOT00000078454;ENSRNOT00000082449;ENSRNOT00000092423	GO:0002474(antigen processing and presentation of peptide antigen via MHC class I);GO:0005102(receptor binding);GO:0005886(plasma membrane);GO:0006955(immune response);GO:0016021(integral component of membrane);GO:0042605(peptide antigen binding);GO:0042612(MHC class I protein complex);GO:0042612(MHC class I protein complex)	04514(Cell adhesion molecules (CAMs));04144(Endocytosis);04145(Phagosome);04650(Natural killer cell mediated cytotoxicity);04612(Antigen processing and presentation);05203(Viral carcinogenesis);05320(Autoimmune thyroid disease);05330(Allograft rejection);05332(Graft-versus-host disease);05416(Viral myocarditis);04940(Type I diabetes mellitus);05166(HTLV-I infection);05168(Herpes simplex infection…	K06751	NA	RT1 class I, locus T24, gene 3 [Rattus norvegicus]	53.2396	6.92604	6.47457	10.5951	3.5247	1.8175	0.00962225	0.287163	up	yes
ENSRNOG00000019428	Higd1a	ENSRNOT00000064114	GO:0005634(nucleus);GO:0005739(mitochondrion);GO:0005743(mitochondrial inner membrane);GO:0016020(membrane);GO:0016021(integral component of membrane);GO:0042149(cellular response to glucose starvation);GO:0043066(negative regulation of apoptotic process);GO:0043234(protein complex);GO:0055114(oxidation-reduction process);GO:0070469(respiratory chain);GO:0071456(cellular response to hypoxia);GO:0…	NA	NA	NA	HIG1 domain family member 1A, mitochondrial [Rattus norvegicus]	13.1003	8.55343	21.5454	24.4657	0.47062	-1.08736	0.0096423	0.287163	down	yes
ENSRNOG00000016265	Acsl5	ENSRNOT00000022126	GO:0001676(long-chain fatty acid metabolic process);GO:0004467(long-chain fatty acid-CoA ligase activity);GO:0005524(ATP binding);GO:0005634(nucleus);GO:0005730(nucleolus);GO:0005739(mitochondrion);GO:0005741(mitochondrial outer membrane);GO:0005743(mitochondrial inner membrane);GO:0005783(endoplasmic reticulum);GO:0005789(endoplasmic reticulum membrane);GO:0006631(fatty acid metabolic process);G…	01212(Fatty acid metabolism);00061(Fatty acid biosynthesis);00071(Fatty acid degradation);04146(Peroxisome);04920(Adipocytokine signaling pathway);03320(PPAR signaling pathway)	K01897	EC:6.2.1.3	Acyl-CoA synthetase long-chain family member 5 [Rattus norvegicus]	34.6525	25.7135	71.2701	58.8081	0.464074	-1.10757	0.00971018	0.288469	down	yes
ENSRNOG00000021177	Cox8a	ENSRNOT00000028754	GO:0006123(mitochondrial electron transport, cytochrome c to oxygen);GO:0016021(integral component of membrane);GO:1902600(hydrogen ion transmembrane transport)	00190(Oxidative phosphorylation);04260(Cardiac muscle contraction);05010(Alzheimer's disease);05012(Parkinson's disease);05016(Huntington's disease);04932(Non-alcoholic fatty liver disease (NAFLD))	K02273	NA	mCG51330, partial [Mus musculus]	93.9862	68.4587	216.176	139.29	0.456991	-1.12976	0.0100378	0.297467	down	yes
ENSRNOG00000005042	Ranbp17	ENSRNOT00000080021	GO:0005049(nuclear export signal receptor activity);GO:0005622(intracellular);GO:0005643(nuclear pore);GO:0005737(cytoplasm);GO:0006611(protein export from nucleus);GO:0006886(intracellular protein transport);GO:0008536(Ran GTPase binding)	NA	NA	NA	ran-binding protein 17 [Rattus norvegicus]	4.58622	4.19597	2.45028	0.737581	2.75489	1.46199	0.0101113	0.298906	up	yes
ENSRNOG00000058675	AABR07035780.5	ENSRNOT00000091067	GO:2000359(regulation of binding of sperm to zona pellucida)	04151(PI3K-Akt signaling pathway);04512(ECM-receptor interaction);04510(Focal adhesion);04610(Complement and coagulation cascades);04611(Platelet activation)	K03900	NA	PREDICTED: LOW QUALITY PROTEIN: zonadhesin isoform X1 [Rattus norvegicus]	3.95986	2.7624	0.996758	1.63497	2.55432	1.35294	0.0101546	0.299447	up	yes
ENSRNOG00000012772	Nqo1	ENSRNOT00000017174	GO:0003955(NAD(P)H dehydrogenase (quinone) activity);GO:0004784(superoxide dismutase activity);GO:0005737(cytoplasm);GO:0005829(cytosol);GO:0006801(superoxide metabolic process);GO:0006979(response to oxidative stress);GO:0007568(aging);GO:0007584(response to nutrient);GO:0014070(response to organic cyclic compound);GO:0019430(removal of superoxide radicals);GO:0032355(response to estradiol);GO:0…	00130(Ubiquinone and other terpenoid-quinone biosynthesis)	K00355	EC:1.6.5.2	NAD(P)H dehydrogenase [quinone] 1 [Rattus norvegicus]	20.7155	10.8061	7.3164	7.13519	2.18118	1.12511	0.0102607	0.301837	up	yes
ENSRNOG00000042855	Ahdc1	ENSRNOT00000067939	GO:0003674(molecular_function);GO:0003677(DNA binding);GO:0005575(cellular_component);GO:0008150(biological_process)	03460(Fanconi anemia pathway)	K02350	EC:2.7.7.7	AT hook, DNA binding motif, containing 1, isoform CRA_b, partial [Mus musculus]	6.45129	7.42118	3.92168	2.58742	2.13124	1.0917	0.0103079	0.302483	up	yes
ENSRNOG00000008989	Cryl1	ENSRNOT00000012093	GO:0003857(3-hydroxyacyl-CoA dehydrogenase activity);GO:0005634(nucleus);GO:0005730(nucleolus);GO:0005737(cytoplasm);GO:0005794(Golgi apparatus);GO:0005829(cytosol);GO:0005886(plasma membrane);GO:0006631(fatty acid metabolic process);GO:0042803(protein homodimerization activity);GO:0050104(L-gulonate 3-dehydrogenase activity);GO:0055114(oxidation-reduction process);GO:0070062(extracellular exosom…	00040(Pentose and glucuronate interconversions)	K13247	EC:1.1.1.45	lambda-crystallin homolog [Rattus norvegicus]	1.26428	1.50293	6.06197	2.52112	0.322403	-1.63306	0.0103415	0.302729	down	yes
ENSRNOG00000052176	AC115255.1	ENSRNOT00000084663	NA	NA	NA	NA		10.7438	8.25767	19.6506	19.7541	0.482212	-1.05226	0.0103787	0.302733	down	yes
ENSRNOG00000053272	Chi3l1	ENSRNOT00000078599	GO:0003674(molecular_function);GO:0004568(chitinase activity);GO:0005615(extracellular space);GO:0005737(cytoplasm);GO:0005783(endoplasmic reticulum);GO:0005975(carbohydrate metabolic process);GO:0006032(chitin catabolic process);GO:0006915(apoptotic process);GO:0006954(inflammatory response);GO:0007250(activation of NF-kappaB-inducing kinase activity);GO:0008061(chitin binding);GO:0009612(respon…	00520(Amino sugar and nucleotide sugar metabolism)	K01183	EC:3.2.1.14	chitinase-3-like protein 1 isoform 2 precursor [Rattus norvegicus]	3.51869	1.90645	0.665869	1.12488	3.02953	1.59909	0.0103921	0.302733	up	yes
ENSRNOG00000009734	Akr1b8	ENSRNOT00000013073;ENSRNOT00000074951;ENSRNOT00000078996	GO:0055114(oxidation-reduction process);GO:0001758(retinal dehydrogenase activity);GO:0004032(alditol:NADP+ 1-oxidoreductase activity);GO:0005829(cytosol);GO:0016488(farnesol catabolic process);GO:0016918(retinal binding);GO:0019751(polyol metabolic process);GO:0042572(retinol metabolic process);GO:0042574(retinal metabolic process);GO:0044597(daunorubicin metabolic process);GO:0044598(doxorubici…	00040(Pentose and glucuronate interconversions);00051(Fructose and mannose metabolism);00052(Galactose metabolism);00561(Glycerolipid metabolism);00561(Glycerolipid metabolism)	K00011	EC:1.1.1.21	aldo-keto reductase family 1 member B10 [Rattus norvegicus]	0.660221	0.0983585	2.27144	1.11385	0.224081	-2.15791	0.0105767	0.307363	down	yes
ENSRNOG00000060307	Ten1	ENSRNOT00000086382;ENSRNOT00000083022;ENSRNOT00000087084	GO:0000784(nuclear chromosome, telomeric region);GO:0003697(single-stranded DNA binding);GO:0005634(nucleus);GO:0010521(telomerase inhibitor activity);GO:0042162(telomeric DNA binding);GO:0051974(negative regulation of telomerase activity);GO:0051974(negative regulation of telomerase activity)	NA	NA	NA	rCG35178, isoform CRA_b [Rattus norvegicus]	16.0295	5.50587	4.6484	1.60487	3.44386	1.78403	0.0106162	0.307766	up	yes
ENSRNOG00000012343	Pdp2	ENSRNOT00000016462	GO:0000287(magnesium ion binding);GO:0004722(protein serine/threonine phosphatase activity);GO:0004724(magnesium-dependent protein serine/threonine phosphatase activity);GO:0004741([pyruvate dehydrogenase (lipoamide)] phosphatase activity);GO:0005739(mitochondrion);GO:0006470(protein dephosphorylation);GO:0009758(carbohydrate utilization);GO:0019910(mitochondrial pyruvate dehydrogenase (lipoamide…	04010(MAPK signaling pathway)	K04461	EC:3.1.3.16	[Pyruvate dehydrogenase [acetyl-transferring]]-phosphatase 2, mitochondrial precursor [Rattus norvegicus]	2.15297	4.03775	6.98614	8.36984	0.403148	-1.31062	0.0107097	0.30973	down	yes
ENSRNOG00000011016	Slc7a2	ENSRNOT00000015127;ENSRNOT00000014809	GO:0000064(L-ornithine transmembrane transporter activity);GO:0002537(nitric oxide production involved in inflammatory response);GO:0005289(high-affinity arginine transmembrane transporter activity);GO:0005292(high-affinity lysine transmembrane transporter activity);GO:0005886(plasma membrane);GO:0005887(integral component of plasma membrane);GO:0006809(nitric oxide biosynthetic process);GO:00151…	05206(MicroRNAs in cancer);05206(MicroRNAs in cancer)	K13863	NA	PREDICTED: cationic amino acid transporter 2 isoform X2 [Rattus norvegicus]	4.53424	6.79705	9.00391	17.3738	0.429579	-1.21901	0.0108409	0.312771	down	yes
ENSRNOG00000011800	F3	ENSRNOT00000015836	GO:0001938(positive regulation of endothelial cell proliferation);GO:0002020(protease binding);GO:0002541(activation of plasma proteins involved in acute inflammatory response);GO:0004896(cytokine receptor activity);GO:0005543(phospholipid binding);GO:0005615(extracellular space);GO:0005737(cytoplasm);GO:0005886(plasma membrane);GO:0006919(activation of cysteine-type endopeptidase activity involv…	04610(Complement and coagulation cascades);04933(AGE-RAGE signaling pathway in diabetic complications)	K03901	NA	tissue factor precursor [Rattus norvegicus]	0.171262	0.146892	0.797284	0.532827	0.239194	-2.06375	0.0109082	0.313366	down	yes
ENSRNOG00000000936	Stx2	ENSRNOT00000001242;ENSRNOT00000037296	GO:0000149(SNARE binding);GO:0005484(SNAP receptor activity);GO:0005515(protein binding);GO:0005615(extracellular space);GO:0005622(intracellular);GO:0005886(plasma membrane);GO:0005911(cell-cell junction);GO:0006886(intracellular protein transport);GO:0006903(vesicle targeting);GO:0006906(vesicle fusion);GO:0007340(acrosome reaction);GO:0008021(synaptic vesicle);GO:0009986(cell surface);GO:00160…	04130(SNARE interactions in vesicular transport);04721(Synaptic vesicle cycle);04721(Synaptic vesicle cycle)	K08486	NA	PREDICTED: syntaxin-2 isoform X4 [Rattus norvegicus]	28.1032	36.6865	17.1097	13.8668	2.09158	1.06459	0.0109137	0.313366	up	yes
ENSRNOG00000055292	LOC679087	ENSRNOT00000087602	GO:0000166(nucleotide binding);GO:0003676(nucleic acid binding)	NA	NA	NA	PREDICTED: LOW QUALITY PROTEIN: RNA-binding protein 12B isoform X1 [Rattus norvegicus]	3.24943	3.82937	1.45999	1.53439	2.36403	1.24125	0.010943	0.313455	up	yes
ENSRNOG00000020468	Stard4	ENSRNOT00000027755	GO:0005783(endoplasmic reticulum);GO:0005829(cytosol);GO:0008289(lipid binding);GO:0016023(cytoplasmic, membrane-bounded vesicle);GO:0034435(cholesterol esterification)	NA	NA	NA	stAR-related lipid transfer protein 4 [Rattus norvegicus]	2.20482	3.66831	6.06288	7.86017	0.421827	-1.24528	0.0111177	0.317701	down	yes
ENSRNOG00000048264	Hist1h1d	ENSRNOT00000075069	GO:0000122(negative regulation of transcription from RNA polymerase II promoter);GO:0000786(nucleosome);GO:0000790(nuclear chromatin);GO:0003677(DNA binding);GO:0005719(nuclear euchromatin);GO:0006334(nucleosome assembly);GO:0006357(regulation of transcription from RNA polymerase II promoter);GO:0016584(nucleosome positioning);GO:0031490(chromatin DNA binding);GO:0044822(poly(A) RNA binding);GO:0…	05203(Viral carcinogenesis);05322(Systemic lupus erythematosus);05034(Alcoholism)	K11254	NA	PREDICTED: histone H1.3 [Rattus norvegicus]	4.14668	2.82054	1.1597	0.113274	5.47317	2.45238	0.0112199	0.319376	up	yes
ENSRNOG00000011947	Tifab	ENSRNOT00000015878	GO:0003674(molecular_function);GO:0005575(cellular_component);GO:0008150(biological_process)	NA	NA	NA	TRAF-interacting protein with FHA domain-containing protein B [Rattus norvegicus]	5.26968	2.91433	1.60875	1.22151	2.89162	1.53188	0.0112497	0.319376	up	yes
ENSRNOG00000053339	AABR07062512.1	ENSRNOT00000086465	GO:0005216(ion channel activity);GO:0006816(calcium ion transport);GO:0016021(integral component of membrane);GO:0034220(ion transmembrane transport)	04020(Calcium signaling pathway);04070(Phosphatidylinositol signaling system);04022(cGMP - PKG signaling pathway);04114(Oocyte meiosis);04210(Apoptosis);04540(Gap junction);04611(Platelet activation);04922(Glucagon signaling pathway);04912(GnRH signaling pathway);04915(Estrogen signaling pathway);04921(Oxytocin signaling pathway);04918(Thyroid hormone synthesis);04924(Renin secretion);04925(Aldos…	K04959	NA	IP3 receptor isoform 2 [Rattus norvegicus]	1.94853	2.53631	7.3087	4.5271	0.378922	-1.40003	0.0112561	0.319376	down	yes
ENSRNOG00000048172	Rac3	ENSRNOT00000073886	GO:0003924(GTPase activity);GO:0005525(GTP binding);GO:0005829(cytosol);GO:0005856(cytoskeleton);GO:0007264(small GTPase mediated signal transduction);GO:0012505(endomembrane system);GO:0014041(regulation of neuron maturation);GO:0021894(cerebral cortex GABAergic interneuron development);GO:0022604(regulation of cell morphogenesis);GO:0030031(cell projection assembly);GO:0030036(actin cytoskeleto…	04014(Ras signaling pathway);04015(Rap1 signaling pathway);04010(MAPK signaling pathway);04310(Wnt signaling pathway);04370(VEGF signaling pathway);04071(Sphingolipid signaling pathway);04024(cAMP signaling pathway);04810(Regulation of actin cytoskeleton);04510(Focal adhesion);04520(Adherens junction);04650(Natural killer cell mediated cytotoxicity);04662(B cell receptor signaling pathway);04664(…	K07861	NA	PREDICTED: ras-related C3 botulinum toxin substrate 3 [Orcinus orca]	61.7486	122.914	42.204	42.4761	2.18071	1.1248	0.0113977	0.32263	up	yes
ENSRNOG00000013376	Mvd	ENSRNOT00000018145	GO:0004163(diphosphomevalonate decarboxylase activity);GO:0005524(ATP binding);GO:0005777(peroxisome);GO:0005782(peroxisomal matrix);GO:0005829(cytosol);GO:0006695(cholesterol biosynthetic process);GO:0008284(positive regulation of cell proliferation);GO:0008299(isoprenoid biosynthetic process);GO:0019287(isopentenyl diphosphate biosynthetic process, mevalonate pathway);GO:0030544(Hsp70 protein b…	00900(Terpenoid backbone biosynthesis)	K01597	EC:4.1.1.33	Mevalonate (diphospho) decarboxylase [Rattus norvegicus]	9.6632	11.0701	26.0973	17.9798	0.470387	-1.08808	0.0114563	0.323525	down	yes
ENSRNOG00000045967	AABR07064061.1	ENSRNOT00000072431	GO:0005747(mitochondrial respiratory chain complex I);GO:0005759(mitochondrial matrix);GO:0006120(mitochondrial electron transport, NADH to ubiquinone);GO:0008137(NADH dehydrogenase (ubiquinone) activity);GO:0043209(myelin sheath)	00190(Oxidative phosphorylation);05010(Alzheimer's disease);05012(Parkinson's disease);05016(Huntington's disease);04932(Non-alcoholic fatty liver disease (NAFLD))	K03954	NA	NADH dehydrogenase (ubiquinone) 1 alpha subcomplex 10-like [Rattus norvegicus]	2.10484	0.959844	7.7076	2.32058	0.305607	-1.71025	0.0115426	0.325197	down	yes
ENSRNOG00000026415	Col14a1	ENSRNOT00000067649	GO:0003229(ventricular cardiac muscle tissue development);GO:0005614(interstitial matrix);GO:0005615(extracellular space);GO:0030199(collagen fibril organization);GO:0031012(extracellular matrix);GO:0044822(poly(A) RNA binding);GO:0048873(homeostasis of number of cells within a tissue);GO:0061050(regulation of cell growth involved in cardiac muscle cell development);GO:0070062(extracellular exoso…	04974(Protein digestion and absorption)	K08133	NA	collagen alpha-1(XIV) chain precursor [Rattus norvegicus]	0.650185	0.794351	2.25248	1.37823	0.397866	-1.32965	0.0116348	0.326786	down	yes
ENSRNOG00000004500	Myc	ENSRNOT00000006188;ENSRNOT00000092908;ENSRNOT00000092876	GO:0000122(negative regulation of transcription from RNA polymerase II promoter);GO:0000165(MAPK cascade);GO:0000320(re-entry into mitotic cell cycle);GO:0000978(RNA polymerase II core promoter proximal region sequence-specific DNA binding);GO:0000979(RNA polymerase II core promoter sequence-specific DNA binding);GO:0000987(core promoter proximal region sequence-specific DNA binding);GO:0001077(t…	04010(MAPK signaling pathway);04012(ErbB signaling pathway);04310(Wnt signaling pathway);04350(TGF-beta signaling pathway);04390(Hippo signaling pathway);04630(Jak-STAT signaling pathway);04151(PI3K-Akt signaling pathway);04110(Cell cycle);04550(Signaling pathways regulating pluripotency of stem cells);04919(Thyroid hormone signaling pathway);05200(Pathways in cancer);05230(Central carbon metabol…	K04377	NA	c-myc, partial [Rattus norvegicus]	11.3568	10.5103	22.0278	22.1316	0.495186	-1.01396	0.0117007	0.326786	down	yes
ENSRNOG00000061215	Crym	ENSRNOT00000088482	GO:0000122(negative regulation of transcription from RNA polymerase II promoter);GO:0003674(molecular_function);GO:0003714(transcription corepressor activity);GO:0005634(nucleus);GO:0005737(cytoplasm);GO:0005739(mitochondrion);GO:0005829(cytosol);GO:0006839(mitochondrial transport);GO:0007605(sensory perception of sound);GO:0009725(response to hormone);GO:0033280(response to vitamin D);GO:0042403…	NA	NA	NA	ketimine reductase mu-crystallin [Rattus norvegicus]	1.19095	0.409334	3.74683	2.12309	0.272624	-1.87502	0.0117348	0.326786	down	yes
ENSRNOG00000048812	Gpx1	ENSRNOT00000073247	GO:0000302(response to reactive oxygen species);GO:0001659(temperature homeostasis);GO:0001885(endothelial cell development);GO:0002862(negative regulation of inflammatory response to antigenic stimulus);GO:0004602(glutathione peroxidase activity);GO:0005634(nucleus);GO:0005737(cytoplasm);GO:0005739(mitochondrion);GO:0005829(cytosol);GO:0006629(lipid metabolic process);GO:0006641(triglyceride met…	00590(Arachidonic acid metabolism);00480(Glutathione metabolism);04918(Thyroid hormone synthesis);05014(Amyotrophic lateral sclerosis (ALS));05016(Huntington's disease)	K00432	EC:1.11.1.9	glutathione peroxidase 1 [Rattus norvegicus]	801.073	1059.12	2287.42	1790.96	0.45611	-1.13255	0.0117351	0.326786	down	yes
ENSRNOG00000049575	Atn1	ENSRNOT00000051841	GO:0000122(negative regulation of transcription from RNA polymerase II promoter);GO:0001105(RNA polymerase II transcription coactivator activity);GO:0003714(transcription corepressor activity);GO:0005515(protein binding);GO:0005634(nucleus);GO:0005654(nucleoplasm);GO:0005737(cytoplasm);GO:0006351(transcription, DNA-templated);GO:0006355(regulation of transcription, DNA-templated);GO:0008432(JUN k…	04391(Hippo signaling pathway -fly)	K05628	NA	atrophin-1 [Rattus norvegicus]	7.70898	11.6766	4.3333	5.10532	2.05386	1.03834	0.0119067	0.330612	up	yes
ENSRNOG00000018110	Svil	ENSRNOT00000025037;ENSRNOT00000064331	GO:0005634(nucleus);GO:0005737(cytoplasm);GO:0005886(plasma membrane);GO:0005925(focal adhesion);GO:0007010(cytoskeleton organization);GO:0007519(skeletal muscle tissue development);GO:0015629(actin cytoskeleton);GO:0043034(costamere);GO:0051015(actin filament binding);GO:0051015(actin filament binding)	04810(Regulation of actin cytoskeleton);04810(Regulation of actin cytoskeleton)	K05768	NA	PREDICTED: supervillin isoform X8 [Rattus norvegicus]	5.09182	5.50823	1.64963	3.36652	2.11318	1.07942	0.0119276	0.330612	up	yes
ENSRNOG00000060146	Six5	ENSRNOT00000084912	GO:0000978(RNA polymerase II core promoter proximal region sequence-specific DNA binding);GO:0002088(lens development in camera-type eye);GO:0003677(DNA binding);GO:0005515(protein binding);GO:0005634(nucleus);GO:0005654(nucleoplasm);GO:0005737(cytoplasm);GO:0005794(Golgi apparatus);GO:0007286(spermatid development);GO:0008285(negative regulation of cell proliferation);GO:0043231(intracellular me…	05202(Transcriptional misregulation in cancers)	K15615	NA	PREDICTED: homeobox protein SIX5 [Rattus norvegicus]	9.8146	15.1807	6.87407	4.64036	2.17078	1.11821	0.0119685	0.33098	up	yes
ENSRNOG00000004398	Pkhd1l1	ENSRNOT00000005958;ENSRNOT00000057146	GO:0005929(cilium);GO:0016021(integral component of membrane);GO:0016021(integral component of membrane)	NA	NA	NA	fibrocystin-L precursor [Rattus norvegicus]	0.207066	0.714651	0.143709	0.144584	3.19716	1.67679	0.0120162	0.331134	up	yes
ENSRNOG00000002983	Nf1x	ENSRNOT00000039354;ENSRNOT00000091994	GO:0000122(negative regulation of transcription from RNA polymerase II promoter);GO:0000977(RNA polymerase II regulatory region sequence-specific DNA binding);GO:0000981(RNA polymerase II transcription factor activity, sequence-specific DNA binding);GO:0001228(transcriptional activator activity, RNA polymerase II transcription regulatory region sequence-specific binding);GO:0003677(DNA binding);G…	NA	NA	NA	nuclear factor 1 X-type isoform 2 [Homo sapiens]	1.62082	1.76137	4.72054	3.92986	0.390987	-1.35481	0.0120292	0.331134	down	yes
ENSRNOG00000060338	Lipc	ENSRNOT00000082763;ENSRNOT00000085349	GO:0001666(response to hypoxia);GO:0001889(liver development);GO:0004622(lysophospholipase activity);GO:0004806(triglyceride lipase activity);GO:0005576(extracellular region);GO:0005615(extracellular space);GO:0005769(early endosome);GO:0005770(late endosome);GO:0005902(microvillus);GO:0006629(lipid metabolic process);GO:0006631(fatty acid metabolic process);GO:0006633(fatty acid biosynthetic pro…	00561(Glycerolipid metabolism);00561(Glycerolipid metabolism)	K01046	EC:3.1.1.3	hepatic lipase precursor [Rattus norvegicus]	75.2386	77.2248	162.979	156.775	0.476814	-1.0685	0.0121645	0.333949	down	yes
ENSRNOG00000001959	Mx1	ENSRNOT00000039876	GO:0003924(GTPase activity);GO:0005525(GTP binding);GO:0005634(nucleus);GO:0005789(endoplasmic reticulum membrane);GO:0009615(response to virus);GO:0045087(innate immune response);GO:0048471(perinuclear region of cytoplasm);GO:0051607(defense response to virus)	05162(Measles);05164(Influenza A)	K14754	NA	interferon-induced GTP-binding protein Mx1 [Rattus norvegicus]	27.1386	1.57986	3.03888	3.42397	4.44362	2.15174	0.0121871	0.333949	up	yes
ENSRNOG00000055942	AC120310.1	ENSRNOT00000088542	GO:0003735(structural constituent of ribosome);GO:0005840(ribosome);GO:0006412(translation)	03010(Ribosome)	K02934	NA	Rpl6 protein, partial [Rattus norvegicus]	3.27712	4.23449	1.17622	1.17877	3.18967	1.67341	0.012229	0.334334	up	yes
ENSRNOG00000011718	C1rl	ENSRNOT00000015678	GO:0004252(serine-type endopeptidase activity);GO:0005576(extracellular region);GO:0005615(extracellular space);GO:0006508(proteolysis);GO:0006958(complement activation, classical pathway);GO:0045087(innate immune response);GO:0070062(extracellular exosome)	04145(Phagosome);04610(Complement and coagulation cascades);05322(Systemic lupus erythematosus);05133(Pertussis);05150(Staphylococcus aureus infection)	K01330	EC:3.4.21.41	complement component 1, r subcomponent-like [Rattus norvegicus]	56.7997	47.3107	26.9888	24.3915	2.02627	1.01882	0.0122709	0.334717	up	yes
ENSRNOG00000009473	Osbpl7	ENSRNOT00000085830	GO:0005776(autophagosome);GO:0005829(cytosol);GO:0005886(plasma membrane);GO:0006869(lipid transport);GO:0015485(cholesterol binding);GO:0071397(cellular response to cholesterol);GO:0097038(perinuclear endoplasmic reticulum);GO:1901800(positive regulation of proteasomal protein catabolic process)	NA	NA	NA	oxysterol-binding protein-related protein 7 [Rattus norvegicus]	3.24405	6.15015	1.90111	2.33102	2.21974	1.15039	0.012432	0.338343	up	yes
ENSRNOG00000008210	Ky	ENSRNOT00000010992	GO:0007517(muscle organ development);GO:0007528(neuromuscular junction development);GO:0030018(Z disc)	NA	NA	NA	kyphoscoliosis peptidase, isoform CRA_a, partial [Mus musculus]	0.173664	0.871814	2.81869	1.12979	0.26478	-1.91714	0.0127929	0.346311	down	yes
ENSRNOG00000020830	Syne4	ENSRNOT00000090545;ENSRNOT00000051422	GO:0005737(cytoplasm);GO:0007052(mitotic spindle organization);GO:0016021(integral component of membrane);GO:0031309(integral component of nuclear outer membrane);GO:0034993(LINC complex);GO:0044732(mitotic spindle pole body);GO:0045198(establishment of epithelial cell apical/basal polarity);GO:0071790(establishment of spindle pole body localization to nuclear envelope);GO:1903087(mitotic spindle…	NA	NA	NA	nesprin-4 [Rattus norvegicus]	3.61172	2.74494	1.31445	1.2627	2.46655	1.30249	0.0128114	0.346311	up	yes
ENSRNOG00000020775	Cyp2b2	ENSRNOT00000047540;ENSRNOT00000028196	GO:0005506(iron ion binding);GO:0005789(endoplasmic reticulum membrane);GO:0007568(aging);GO:0008392(arachidonic acid epoxygenase activity);GO:0008395(steroid hydroxylase activity);GO:0010038(response to metal ion);GO:0014070(response to organic cyclic compound);GO:0016491(oxidoreductase activity);GO:0016712(oxidoreductase activity, acting on paired donors, with incorporation or reduction of mole…	00140(Steroid hormone biosynthesis);00590(Arachidonic acid metabolism);00830(Retinol metabolism);05204(Chemical carcinogenesis);05204(Chemical carcinogenesis)	K07412	EC:1.14.14.1	cytochrome P450 2B2 precursor [Rattus norvegicus]	7.33895	4.83733	19.2947	9.16405	0.427857	-1.2248	0.0128579	0.346788	down	yes
ENSRNOG00000036604	Ifit2	ENSRNOT00000054757	GO:0003723(RNA binding);GO:0005737(cytoplasm);GO:0005783(endoplasmic reticulum);GO:0009615(response to virus);GO:0032091(negative regulation of protein binding);GO:0035457(cellular response to interferon-alpha);GO:0043065(positive regulation of apoptotic process);GO:0044822(poly(A) RNA binding);GO:0051607(defense response to virus)	05160(Hepatitis C);05168(Herpes simplex infection)	K14217	NA	interferon-induced protein with tetratricopeptide repeats 2 [Rattus norvegicus]	10.1547	3.04523	1.95237	3.14843	2.58781	1.37173	0.0129028	0.347219	up	yes
ENSRNOG00000006715	Ccr1	ENSRNOT00000008772	GO:0004435(phosphatidylinositol phospholipase C activity);GO:0004950(chemokine receptor activity);GO:0005886(plasma membrane);GO:0006816(calcium ion transport);GO:0006874(cellular calcium ion homeostasis);GO:0006887(exocytosis);GO:0006954(inflammatory response);GO:0006955(immune response);GO:0007186(G-protein coupled receptor signaling pathway);GO:0007204(positive regulation of cytosolic calcium …	04060(Cytokine-cytokine receptor interaction);04062(Chemokine signaling pathway)	K04176	NA	C-C chemokine receptor type 1 [Rattus norvegicus]	1.05243	0.66876	0	0.235898	7.29634	2.86717	0.012947	0.347629	up	yes
ENSRNOG00000009096	Pon3	ENSRNOT00000012050	GO:0004063(aryldialkylphosphatase activity);GO:0004064(arylesterase activity);GO:0005615(extracellular space);GO:0009636(response to toxic substance);GO:0010124(phenylacetate catabolic process);GO:0016311(dephosphorylation);GO:0018733(3,4-dihydrocoumarin hydrolase activity);GO:0019439(aromatic compound catabolic process);GO:0032929(negative regulation of superoxide anion generation);GO:0042803(pr…	NA	NA	NA	serum paraoxonase/lactonase 3 precursor [Rattus norvegicus]	112.448	105.712	255.64	202.066	0.476638	-1.06903	0.01299	0.348004	down	yes
ENSRNOG00000016678	Angptl2	ENSRNOT00000022585	GO:0070062(extracellular exosome)	04151(PI3K-Akt signaling pathway);04512(ECM-receptor interaction);04510(Focal adhesion);05206(MicroRNAs in cancer)	K06252	NA	angiopoietin-like 2 [Rattus norvegicus]	2.5059	2.85215	8.57489	4.43379	0.411883	-1.27969	0.0130699	0.349028	down	yes
ENSRNOG00000020465	Ripk3	ENSRNOT00000027759	GO:0001914(regulation of T cell mediated cytotoxicity);GO:0002819(regulation of adaptive immune response);GO:0004672(protein kinase activity);GO:0004674(protein serine/threonine kinase activity);GO:0004704(NF-kappaB-inducing kinase activity);GO:0005524(ATP binding);GO:0005622(intracellular);GO:0005739(mitochondrion);GO:0005829(cytosol);GO:0005886(plasma membrane);GO:0007249(I-kappaB kinase/NF-kap…	04668(TNF signaling pathway);04623(Cytosolic DNA-sensing pathway)	K08847	EC:2.7.11.1	RecName: Full=Receptor-interacting serine/threonine-protein kinase 3; AltName: Full=Homocysteine respondent protein HCYP2; AltName: Full=RIP-like protein kinase 3; AltName: Full=Receptor-interacting protein 3; Short=RIP-3	8.5957	2.77055	1.67571	2.48606	2.73111	1.44949	0.0130873	0.349028	up	yes
ENSRNOG00000007743	Mgst1	ENSRNOT00000010579	GO:0004364(glutathione transferase activity);GO:0004602(glutathione peroxidase activity);GO:0005634(nucleus);GO:0005739(mitochondrion);GO:0005741(mitochondrial outer membrane);GO:0005743(mitochondrial inner membrane);GO:0005778(peroxisomal membrane);GO:0005783(endoplasmic reticulum);GO:0005789(endoplasmic reticulum membrane);GO:0006749(glutathione metabolic process);GO:0010243(response to organon…	00480(Glutathione metabolism);00980(Metabolism of xenobiotics by cytochrome P450);00982(Drug metabolism - cytochrome P450);05204(Chemical carcinogenesis)	K00799	EC:2.5.1.18	microsomal glutathione S-transferase 1 isoform 2 [Mus musculus]	1620.58	1200.95	3108.85	2781.09	0.479042	-1.06178	0.0131155	0.349028	down	yes
ENSRNOG00000012874	Rgma	ENSRNOT00000068766;ENSRNOT00000076446	GO:0001843(neural tube closure);GO:0001948(glycoprotein binding);GO:0003674(molecular_function);GO:0005783(endoplasmic reticulum);GO:0005886(plasma membrane);GO:0009986(cell surface);GO:0010976(positive regulation of neuron projection development);GO:0010977(negative regulation of neuron projection development);GO:0015026(coreceptor activity);GO:0030509(BMP signaling pathway);GO:0030510(regulatio…	NA	NA	NA	repulsive guidance molecule A [Rattus norvegicus]	0.399094	0.337756	0.124954	0.0512962	4.18071	2.06375	0.0132523	0.351889	up	yes
ENSRNOG00000019330	Procr	ENSRNOT00000055254	GO:0005813(centrosome);GO:0005925(focal adhesion);GO:0006955(immune response);GO:0007596(blood coagulation);GO:0009986(cell surface);GO:0016021(integral component of membrane);GO:0050819(negative regulation of coagulation);GO:0070062(extracellular exosome)	04610(Complement and coagulation cascades)	K06557	NA	endothelial protein C receptor precursor [Rattus norvegicus]	1.25419	0.719692	1.69077	4.77279	0.305386	-1.71129	0.0133567	0.353744	down	yes
ENSRNOG00000001216	Trpm2	ENSRNOT00000001631	GO:0005261(cation channel activity);GO:0005622(intracellular);GO:0006979(response to oxidative stress);GO:0016021(integral component of membrane);GO:0047631(ADP-ribose diphosphatase activity)	04921(Oxytocin signaling pathway)	K04977	EC:3.6.1.13	PREDICTED: transient receptor potential cation channel subfamily M member 2 isoform X2 [Rattus norvegicus]	5.32853	7.36949	2.63569	3.63936	2.02357	1.01691	0.0133811	0.353744	up	yes
ENSRNOG00000013053	Trpm6	ENSRNOT00000017892	GO:0004674(protein serine/threonine kinase activity);GO:0005261(cation channel activity);GO:0005524(ATP binding);GO:0005575(cellular_component);GO:0006468(protein phosphorylation);GO:0008150(biological_process);GO:0009636(response to toxic substance);GO:0016021(integral component of membrane);GO:0016324(apical plasma membrane);GO:0030001(metal ion transport);GO:0031526(brush border membrane);GO:0…	04978(Mineral absorption)	K04981	EC:2.7.11.1	PREDICTED: transient receptor potential cation channel subfamily M member 6 isoform X2 [Rattus norvegicus]	0.255308	0.025222	0.346963	1.06821	0.19823	-2.33475	0.0134594	0.354745	down	yes
ENSRNOG00000005420	Abcg8	ENSRNOT00000007638;ENSRNOT00000061871	GO:0005524(ATP binding);GO:0007584(response to nutrient);GO:0007588(excretion);GO:0010949(negative regulation of intestinal phytosterol absorption);GO:0015248(sterol transporter activity);GO:0015914(phospholipid transport);GO:0015918(sterol transport);GO:0016324(apical plasma membrane);GO:0016887(ATPase activity);GO:0017127(cholesterol transporter activity);GO:0030300(regulation of intestinal cho…	02010(ABC transporters);04976(Bile secretion);04975(Fat digestion and absorption);04975(Fat digestion and absorption)	K05684	NA	RecName: Full=ATP-binding cassette sub-family G member 8; AltName: Full=Sterolin-2	0.195192	1.28441	4.14083	1.71224	0.25279	-1.98399	0.0134781	0.354745	down	yes
ENSRNOG00000010111	Exoc3l4	ENSRNOT00000013460	GO:0000145(exocyst);GO:0000149(SNARE binding);GO:0006887(exocytosis);GO:0051601(exocyst localization)	04530(Tight junction)	K06110	NA	exocyst complex component 3-like protein 4 [Rattus norvegicus]	1.12687	1.17257	0.295884	0.47585	2.97957	1.57511	0.0135193	0.354745	up	yes
ENSRNOG00000015498	Il17rb	ENSRNOT00000072778;ENSRNOT00000020823	GO:0005737(cytoplasm);GO:0005887(integral component of plasma membrane);GO:0009986(cell surface);GO:0019221(cytokine-mediated signaling pathway);GO:0030368(interleukin-17 receptor activity);GO:0050729(positive regulation of inflammatory response);GO:2000664(positive regulation of interleukin-5 secretion);GO:2000667(positive regulation of interleukin-13 secretion);GO:2000667(positive regulation of…	04060(Cytokine-cytokine receptor interaction);04060(Cytokine-cytokine receptor interaction)	K05165	NA	PREDICTED: interleukin-17 receptor B isoform X1 [Rattus norvegicus]	3.16815	3.41293	5.85727	8.08994	0.471856	-1.08358	0.0135372	0.354745	down	yes
ENSRNOG00000060512	AABR07035541.2	ENSRNOT00000086773	GO:0003674(molecular_function);GO:0003723(RNA binding);GO:0003735(structural constituent of ribosome);GO:0005730(nucleolus);GO:0005737(cytoplasm);GO:0005739(mitochondrion);GO:0005840(ribosome);GO:0006412(translation);GO:0008150(biological_process);GO:0022625(cytosolic large ribosomal subunit);GO:0042254(ribosome biogenesis);GO:0070062(extracellular exosome)	03010(Ribosome)	K02915	NA	RecName: Full=60S ribosomal protein L34	8.31833	13.4642	2.22189	4.63344	3.17746	1.66787	0.0135892	0.354855	up	yes
ENSRNOG00000006314	Zbp1	ENSRNOT00000008365;ENSRNOT00000081036	GO:0003677(DNA binding);GO:0003692(left-handed Z-DNA binding);GO:0003723(RNA binding);GO:0003726(double-stranded RNA adenosine deaminase activity);GO:0005634(nucleus);GO:0005737(cytoplasm);GO:0005829(cytosol);GO:0060340(positive regulation of type I interferon-mediated signaling pathway);GO:0060340(positive regulation of type I interferon-mediated signaling pathway)	04623(Cytosolic DNA-sensing pathway);04623(Cytosolic DNA-sensing pathway)	K12965	NA	Z-DNA-binding protein 1 [Rattus norvegicus]	8.57708	0.68382	0.98892	1.17996	4.2699	2.0942	0.0136005	0.354855	up	yes
ENSRNOG00000027139	Krt20	ENSRNOT00000091152;ENSRNOT00000077397;ENSRNOT00000034889	GO:0005198(structural molecule activity);GO:0005737(cytoplasm);GO:0005882(intermediate filament);GO:0006915(apoptotic process);GO:0045109(intermediate filament organization);GO:0050708(regulation of protein secretion);GO:0050708(regulation of protein secretion)	05150(Staphylococcus aureus infection);05130(Pathogenic Escherichia coli infection);05130(Pathogenic Escherichia coli infection)	K07604	NA	rCG34505 [Rattus norvegicus]	0.191342	0.175833	0.786227	0.685603	0.249468	-2.00307	0.0137285	0.357335	down	yes
ENSRNOG00000000041	Slc26a1	ENSRNOT00000000047	GO:0005254(chloride channel activity);GO:0005887(integral component of plasma membrane);GO:0006821(chloride transport);GO:0008271(secondary active sulfate transmembrane transporter activity);GO:0008272(sulfate transport);GO:0015106(bicarbonate transmembrane transporter activity);GO:0015108(chloride transmembrane transporter activity);GO:0015116(sulfate transmembrane transporter activity);GO:00153…	04978(Mineral absorption)	K14704	NA	sulfate anion transporter 1 [Rattus norvegicus]	25.8166	16.5758	36.6072	54.1043	0.467331	-1.09748	0.0137551	0.357335	down	yes
ENSRNOG00000010572	Pus7	ENSRNOT00000014063	GO:0001522(pseudouridine synthesis);GO:0005634(nucleus);GO:0009982(pseudouridine synthase activity);GO:0019899(enzyme binding);GO:0044822(poly(A) RNA binding)	NA	NA	NA	pseudouridylate synthase 7 homolog [Rattus norvegicus]	0.786754	1.41094	2.13377	4.11081	0.351936	-1.50662	0.0140264	0.363074	down	yes
ENSRNOG00000011771	Ptp4a1	ENSRNOT00000016237	GO:0004725(protein tyrosine phosphatase activity);GO:0005634(nucleus);GO:0005737(cytoplasm);GO:0030335(positive regulation of cell migration)	NA	NA	NA	protein tyrosine phosphatase 4a1, isoform CRA_b, partial [Mus musculus]	9.1329	7.45487	26.4583	11.2134	0.440324	-1.18336	0.0140365	0.363074	down	yes
ENSRNOG00000001544	Cyyr1	ENSRNOT00000002109	GO:0003674(molecular_function);GO:0005575(cellular_component);GO:0008150(biological_process);GO:0016021(integral component of membrane)	NA	NA	NA	cysteine and tyrosine-rich protein 1 precursor [Rattus norvegicus]	0.308486	0.119049	0.683751	0.704825	0.307895	-1.69949	0.0142296	0.367278	down	yes
ENSRNOG00000015421	Slc27a3	ENSRNOT00000020815	GO:0001676(long-chain fatty acid metabolic process);GO:0003674(molecular_function);GO:0004321(fatty-acyl-CoA synthase activity);GO:0004467(long-chain fatty acid-CoA ligase activity);GO:0005575(cellular_component);GO:0005739(mitochondrion);GO:0008150(biological_process);GO:0015908(fatty acid transport);GO:0016020(membrane);GO:0016021(integral component of membrane);GO:0031957(very long-chain fatty…	04931(Insulin resistance)	K08772	EC:6.2.1.-	long-chain fatty acid transport protein 3 precursor [Rattus norvegicus]	2.02582	1.08211	0.549399	0.412072	3.23248	1.69264	0.0142822	0.367844	up	yes
ENSRNOG00000017307	Prss23	ENSRNOT00000080927;ENSRNOT00000023239	GO:0004252(serine-type endopeptidase activity);GO:0005576(extracellular region);GO:0005634(nucleus);GO:0006508(proteolysis);GO:0070062(extracellular exosome);GO:0070062(extracellular exosome)	NA	NA	NA	PREDICTED: serine protease 23 isoform X1 [Rattus norvegicus]	2.05165	1.89443	4.97094	3.99022	0.440354	-1.18326	0.0143557	0.368944	down	yes
ENSRNOG00000018735	Cd74	ENSRNOT00000025354;ENSRNOT00000025344	GO:0000187(activation of MAPK activity);GO:0001516(prostaglandin biosynthetic process);GO:0001540(beta-amyloid binding);GO:0001961(positive regulation of cytokine-mediated signaling pathway);GO:0002606(positive regulation of dendritic cell antigen processing and presentation);GO:0002792(negative regulation of peptide secretion);GO:0002830(positive regulation of type 2 immune response);GO:0002906(…	04612(Antigen processing and presentation);05152(Tuberculosis);05168(Herpes simplex infection);05168(Herpes simplex infection)	K06505	NA	PREDICTED: H-2 class II histocompatibility antigen gamma chain isoform X1 [Rattus norvegicus]	81.9226	61.9025	159.46	134.793	0.48878	-1.03274	0.01439	0.369035	down	yes
ENSRNOG00000014320	Inhba	ENSRNOT00000019272	GO:0000082(G1/S transition of mitotic cell cycle);GO:0001541(ovarian follicle development);GO:0001707(mesoderm formation);GO:0001942(hair follicle development);GO:0002244(hematopoietic progenitor cell differentiation);GO:0005102(receptor binding);GO:0005125(cytokine activity);GO:0005160(transforming growth factor beta receptor binding);GO:0005179(hormone activity);GO:0005576(extracellular region)…	04350(TGF-beta signaling pathway);04060(Cytokine-cytokine receptor interaction);04550(Signaling pathways regulating pluripotency of stem cells)	K04667	NA	inhibin beta A chain preproprotein [Rattus norvegicus]	2.36965	2.23121	0.88322	0.944782	2.51688	1.33163	0.0145491	0.37137	up	yes
ENSRNOG00000010714	Fgl1	ENSRNOT00000090644;ENSRNOT00000014248;ENSRNOT00000090763	GO:0008203(cholesterol metabolic process);GO:0010906(regulation of glucose metabolic process);GO:0060612(adipose tissue development);GO:0070062(extracellular exosome);GO:0070062(extracellular exosome)	04610(Complement and coagulation cascades);04611(Platelet activation);05150(Staphylococcus aureus infection);05150(Staphylococcus aureus infection)	K03905	NA	RecName: Full=Fibrinogen-like protein 1; Flags: Precursor	1007.97	559.258	397.009	327.828	2.16218	1.11248	0.0145529	0.37137	up	yes
ENSRNOG00000009945	Pls1	ENSRNOT00000013209	GO:0001951(intestinal D-glucose absorption);GO:0003674(molecular_function);GO:0005509(calcium ion binding);GO:0005575(cellular_component);GO:0005737(cytoplasm);GO:0005903(brush border);GO:0008150(biological_process);GO:0030033(microvillus assembly);GO:0032532(regulation of microvillus length);GO:0040018(positive regulation of multicellular organism growth);GO:0051015(actin filament binding);GO:00…	04810(Regulation of actin cytoskeleton);04510(Focal adhesion);04520(Adherens junction);04530(Tight junction)	K05699	NA	PREDICTED: plastin-1 isoform X1 [Rattus norvegicus]	3.00618	9.0447	19.4353	12.2094	0.380818	-1.39283	0.0145968	0.37137	down	yes
ENSRNOG00000001351	Trafd1	ENSRNOT00000033984;ENSRNOT00000091375	GO:0003674(molecular_function);GO:0005575(cellular_component);GO:0008270(zinc ion binding);GO:0034097(response to cytokine);GO:0045824(negative regulation of innate immune response);GO:0045824(negative regulation of innate immune response)	NA	NA	NA	TRAF-type zinc finger domain-containing protein 1 [Rattus norvegicus]	75.8818	48.9936	25.1844	35.2671	2.06571	1.04664	0.0146357	0.37137	up	yes
ENSRNOG00000059840	Unc5a	ENSRNOT00000087397	GO:0005042(netrin receptor activity);GO:0005886(plasma membrane);GO:0006915(apoptotic process);GO:0007165(signal transduction);GO:0007275(multicellular organism development);GO:0007411(axon guidance);GO:0016020(membrane);GO:0016021(integral component of membrane);GO:0031175(neuron projection development);GO:0031226(intrinsic component of plasma membrane);GO:0032589(neuron projection membrane);GO:…	04360(Axon guidance)	K07521	NA	netrin receptor UNC5A isoform 1 precursor [Mus musculus]	0.477849	0.564996	0.180272	0.092797	3.81898	1.93319	0.014852	0.376062	up	yes
ENSRNOG00000018052	Cnksr3	ENSRNOT00000024418;ENSRNOT00000082931	GO:0005737(cytoplasm);GO:0009966(regulation of signal transduction);GO:0010765(positive regulation of sodium ion transport);GO:0016020(membrane);GO:0033137(negative regulation of peptidyl-serine phosphorylation);GO:0070373(negative regulation of ERK1 and ERK2 cascade);GO:2000651(positive regulation of sodium ion transmembrane transporter activity);GO:2000651(positive regulation of sodium ion tran…	00511(Other glycan degradation);04142(Lysosome);04142(Lysosome)	K01192	EC:3.2.1.25	connector enhancer of kinase suppressor of ras 3 [Rattus norvegicus]	4.90379	4.27809	2.6399	1.66636	2.13222	1.09235	0.0149297	0.376834	up	yes
ENSRNOG00000013201	Tex264	ENSRNOT00000018122	GO:0070062(extracellular exosome)	NA	NA	NA	testis-expressed sequence 264 protein [Rattus norvegicus]	25.4312	17.5088	50.5198	37.2618	0.489168	-1.0316	0.0149453	0.376834	down	yes
ENSRNOG00000058398	AABR07035780.3	ENSRNOT00000089862;ENSRNOT00000081199;ENSRNOT00000084705	GO:2000359(regulation of binding of sperm to zona pellucida);GO:2000359(regulation of binding of sperm to zona pellucida)	NA	NA	NA	PREDICTED: zonadhesin isoform X2 [Rattus norvegicus]	3.8496	3.52552	1.02556	1.96252	2.46817	1.30344	0.0150794	0.378625	up	yes
ENSRNOG00000018730	Nectin2	ENSRNOT00000082125;ENSRNOT00000025388	GO:0001675(acrosome assembly);GO:0002860(positive regulation of natural killer cell mediated cytotoxicity directed against tumor cell target);GO:0002891(positive regulation of immunoglobulin mediated immune response);GO:0003674(molecular_function);GO:0004872(receptor activity);GO:0005102(receptor binding);GO:0005886(plasma membrane);GO:0005887(integral component of plasma membrane);GO:0005911(cel…	04514(Cell adhesion molecules (CAMs));04520(Adherens junction);05168(Herpes simplex infection);05168(Herpes simplex infection)	K06531	NA	PREDICTED: nectin-2 isoform X1 [Rattus norvegicus]	16.67	15.0741	24.7934	42.1095	0.47448	-1.07558	0.0151333	0.378771	down	yes
ENSRNOG00000023686	Upk3b	ENSRNOT00000037639	GO:0010629(negative regulation of gene expression);GO:0016021(integral component of membrane);GO:0046325(negative regulation of glucose import);GO:0070062(extracellular exosome)	05219(Bladder cancer)	K19520	NA	PREDICTED: uroplakin-3b isoform X1 [Rattus norvegicus]	1.47431	4.18136	1.05973	0.336216	4.05149	2.01845	0.0151483	0.378771	up	yes
ENSRNOG00000019217	Adrb2	ENSRNOT00000026098	GO:0001666(response to hypoxia);GO:0001889(liver development);GO:0001965(G-protein alpha-subunit binding);GO:0001993(regulation of systemic arterial blood pressure by norepinephrine-epinephrine);GO:0002024(diet induced thermogenesis);GO:0002025(vasodilation by norepinephrine-epinephrine involved in regulation of systemic arterial blood pressure);GO:0002028(regulation of sodium ion transport);GO:0…	04020(Calcium signaling pathway);04024(cAMP signaling pathway);04022(cGMP - PKG signaling pathway);04080(Neuroactive ligand-receptor interaction);04144(Endocytosis);04923(Regulation of lipolysis in adipocyte);04924(Renin secretion);04261(Adrenergic signaling in cardiomyocytes);04970(Salivary secretion)	K04142	NA	beta-2 adrenergic receptor [Rattus norvegicus]	3.54377	0.917936	0.732028	0.575048	3.4135	1.77125	0.015186	0.378925	up	yes
ENSRNOG00000046700	Mettl27	ENSRNOT00000074851	GO:0005737(cytoplasm);GO:0008757(S-adenosylmethionine-dependent methyltransferase activity);GO:0032259(methylation)	NA	NA	NA	Williams-Beuren syndrome chromosomal region 27 protein [Rattus norvegicus]	9.02194	8.35079	3.81648	3.3754	2.41561	1.27239	0.015334	0.38	up	yes
ENSRNOG00000009153	Cidec	ENSRNOT00000091965;ENSRNOT00000012136	GO:0005622(intracellular);GO:0005634(nucleus);GO:0005783(endoplasmic reticulum);GO:0005811(lipid particle);GO:0005829(cytosol);GO:0006351(transcription, DNA-templated);GO:0006355(regulation of transcription, DNA-templated);GO:0006915(apoptotic process);GO:0034389(lipid particle organization);GO:0042981(regulation of apoptotic process);GO:0097194(execution phase of apoptosis);GO:0097194(execution …	04210(Apoptosis);04210(Apoptosis)	K02310	NA	cell death-inducing DFFA-like effector c, isoform CRA_d, partial [Mus musculus]	10.0476	13.3664	24.6167	23.3441	0.488191	-1.03448	0.0153893	0.38	down	yes
ENSRNOG00000029115	AABR07057190.1	ENSRNOT00000041210	GO:0005515(protein binding)	03010(Ribosome)	K02870	NA	PREDICTED: 60S ribosomal protein L12 [Bubalus bubalis]	26.6867	16.2402	10.653	1.54653	3.51873	1.81505	0.0153922	0.38	up	yes
ENSRNOG00000029195	Uba7	ENSRNOT00000084429;ENSRNOT00000068295	GO:0004839(ubiquitin activating enzyme activity);GO:0004842(ubiquitin-protein transferase activity);GO:0005524(ATP binding);GO:0005634(nucleus);GO:0005829(cytosol);GO:0006464(cellular protein modification process);GO:0016567(protein ubiquitination);GO:0019782(ISG15 activating enzyme activity);GO:0019941(modification-dependent protein catabolic process);GO:0032020(ISG15-protein conjugation);GO:003…	04120(Ubiquitin mediated proteolysis);05012(Parkinson's disease);05012(Parkinson's disease)	K10698	EC:6.2.1.45	PREDICTED: ubiquitin-like modifier-activating enzyme 7 isoform X1 [Rattus norvegicus]	17.8894	4.49178	4.10175	4.70941	2.54009	1.34488	0.015419	0.38	up	yes
ENSRNOG00000007706	Prkaa2	ENSRNOT00000010680	GO:0003682(chromatin binding);GO:0004672(protein kinase activity);GO:0004674(protein serine/threonine kinase activity);GO:0004679(AMP-activated protein kinase activity);GO:0004712(protein serine/threonine/tyrosine kinase activity);GO:0005515(protein binding);GO:0005524(ATP binding);GO:0005634(nucleus);GO:0005654(nucleoplasm);GO:0005737(cytoplasm);GO:0006351(transcription, DNA-templated);GO:000635…	04068(FoxO signaling pathway);04151(PI3K-Akt signaling pathway);04152(AMPK signaling pathway);04150(mTOR signaling pathway);04140(Regulation of autophagy);04910(Insulin signaling pathway);04922(Glucagon signaling pathway);04920(Adipocytokine signaling pathway);04921(Oxytocin signaling pathway);04211(Longevity regulating pathway - mammal);04213(Longevity regulating pathway - multiple species);0471…	K07198	EC:2.7.11.11	protein kinase, AMP-activated, alpha 2 catalytic subunit, isoform CRA_a [Rattus norvegicus]	0.180174	0.259505	0.672889	0.841725	0.290291	-1.78443	0.0154191	0.38	down	yes
ENSRNOG00000049198	LOC102548682	ENSRNOT00000074024	GO:0000788(nuclear nucleosome);GO:0006334(nucleosome assembly);GO:0031492(nucleosomal DNA binding);GO:0046982(protein heterodimerization activity)	05202(Transcriptional misregulation in cancers);05322(Systemic lupus erythematosus);05034(Alcoholism)	K11253	NA	histone H3 type 2 [Culex quinquefasciatus]	4.12043	2.44889	0.667351	1.1058	3.70488	1.88942	0.0155302	0.381954	up	yes
ENSRNOG00000004555	Sec14l4	ENSRNOT00000078271;ENSRNOT00000006053;ENSRNOT00000087383	GO:0005215(transporter activity);GO:0005622(intracellular);GO:0006810(transport);GO:0016021(integral component of membrane);GO:0008289(lipid binding);GO:0070062(extracellular exosome);GO:0070062(extracellular exosome)	00566(Ether lipid metabolism);00600(Sphingolipid metabolism);00600(Sphingolipid metabolism)	K01019	EC:2.8.2.11	RecName: Full=SEC14-like protein 3; AltName: Full=45 kDa secretory protein; Short=rsec45	7.39095	5.3397	10.5148	15.8974	0.481999	-1.0529	0.015662	0.384407	down	yes
ENSRNOG00000007822	Vgll4	ENSRNOT00000010338	GO:0006355(regulation of transcription, DNA-templated)	NA	NA	NA	transcription cofactor vestigial-like protein 4 [Rattus norvegicus]	4.35732	3.99181	7.3568	11.6682	0.438851	-1.1882	0.0156979	0.384502	down	yes
ENSRNOG00000039379	C17h6orf52	ENSRNOT00000060340	GO:0000166(nucleotide binding);GO:0003676(nucleic acid binding)	NA	NA	NA	putative uncharacterized protein C6orf52 homolog [Rattus norvegicus]	0.592301	0.498034	2.03662	1.45575	0.312205	-1.67943	0.0157776	0.385667	down	yes
ENSRNOG00000000786	Rpp21	ENSRNOT00000091967;ENSRNOT00000081091;ENSRNOT00000001024;ENSRNOT00000081695;ENSRNOT00000081304;ENSRNOT00000085221;ENSRNOT00000078880;ENSRNOT00000083622	GO:0003674(molecular_function);GO:0004526(ribonuclease P activity);GO:0005575(cellular_component);GO:0005655(nucleolar ribonuclease P complex);GO:0008033(tRNA processing);GO:0008150(biological_process);GO:0042493(response to drug);GO:0090502(RNA phosphodiester bond hydrolysis, endonucleolytic);GO:0005634(nucleus);GO:0016787(hydrolase activity);GO:0046872(metal ion binding);GO:0046872(metal ion bi…	03013(RNA transport);03013(RNA transport)	K03540	EC:3.1.26.5	PREDICTED: ribonuclease P protein subunit p21 isoform X1 [Odobenus rosmarus divergens]	36.2855	43.9147	68.0664	100.882	0.474703	-1.0749	0.0159901	0.389888	down	yes
ENSRNOG00000042848	Jam2	ENSRNOT00000046973	GO:0007162(negative regulation of cell adhesion);GO:0016021(integral component of membrane);GO:0046982(protein heterodimerization activity)	04514(Cell adhesion molecules (CAMs));04530(Tight junction);04670(Leukocyte transendothelial migration)	K06735	NA	junctional adhesion molecule B precursor [Rattus norvegicus]	1.54468	0.684792	2.87225	2.49963	0.415026	-1.26873	0.016027	0.389888	down	yes
ENSRNOG00000037198	Usp18	ENSRNOT00000056174	GO:0005634(nucleus);GO:0006511(ubiquitin-dependent protein catabolic process);GO:0016579(protein deubiquitination);GO:0019785(ISG15-specific protease activity);GO:0035634(response to stilbenoid);GO:0036459(thiol-dependent ubiquitinyl hydrolase activity)	NA	NA	NA	ubl carboxyl-terminal hydrolase 18 [Rattus norvegicus]	42.3735	3.42411	5.80847	6.46892	3.73024	1.89927	0.0160477	0.389888	up	yes
ENSRNOG00000016731	Tpm2	ENSRNOT00000049000;ENSRNOT00000022801	NA	04260(Cardiac muscle contraction);04261(Adrenergic signaling in cardiomyocytes);05206(MicroRNAs in cancer);05410(Hypertrophic cardiomyopathy (HCM));05414(Dilated cardiomyopathy (DCM));05414(Dilated cardiomyopathy (DCM))	K10373	NA		3.00208	1.86133	6.37965	5.30839	0.416102	-1.26499	0.0161577	0.391768	down	yes
ENSRNOG00000049099	AABR07017250.1	ENSRNOT00000047113	GO:0000028(ribosomal small subunit assembly);GO:0003735(structural constituent of ribosome);GO:0022627(cytosolic small ribosomal subunit)	03010(Ribosome)	K02947	NA	mCG129780 [Mus musculus]	0.280684	1.94779	5.7154	4.76984	0.212534	-2.23423	0.0162563	0.393362	down	yes
ENSRNOG00000020918	Ccnd1	ENSRNOT00000028411;ENSRNOT00000088588	GO:0000082(G1/S transition of mitotic cell cycle);GO:0000122(negative regulation of transcription from RNA polymerase II promoter);GO:0000307(cyclin-dependent protein kinase holoenzyme complex);GO:0000320(re-entry into mitotic cell cycle);GO:0001889(liver development);GO:0001934(positive regulation of protein phosphorylation);GO:0003714(transcription corepressor activity);GO:0004672(protein kinas…	04310(Wnt signaling pathway);04390(Hippo signaling pathway);04630(Jak-STAT signaling pathway);04068(FoxO signaling pathway);04151(PI3K-Akt signaling pathway);04152(AMPK signaling pathway);04110(Cell cycle);04115(p53 signaling pathway);04510(Focal adhesion);04917(Prolactin signaling pathway);04921(Oxytocin signaling pathway);04919(Thyroid hormone signaling pathway);05200(Pathways in cancer);05206(…	K04503	NA	G1/S-specific cyclin-D1 [Rattus norvegicus]	3.66995	1.55519	6.55543	5.00829	0.451856	-1.14606	0.0163184	0.394072	down	yes
ENSRNOG00000019009	Arrdc2	ENSRNOT00000025956	GO:0003674(molecular_function);GO:0005886(plasma membrane);GO:0007165(signal transduction);GO:0008150(biological_process);GO:0031410(cytoplasmic vesicle)	NA	NA	NA	arrestin domain containing 2, isoform CRA_b, partial [Mus musculus]	8.21196	7.22294	2.52092	4.80461	2.107	1.07519	0.0165472	0.398468	up	yes
ENSRNOG00000022273	Rfk	ENSRNOT00000030491	GO:0005739(mitochondrion);GO:0006915(apoptotic process);GO:0008531(riboflavin kinase activity);GO:0009231(riboflavin biosynthetic process);GO:0016310(phosphorylation);GO:0033864(positive regulation of NAD(P)H oxidase activity);GO:0072593(reactive oxygen species metabolic process)	00740(Riboflavin metabolism)	K00861	EC:2.7.1.26	riboflavin kinase [Rattus norvegicus]	5.14163	3.99198	10.659	8.2155	0.483913	-1.04718	0.0165733	0.398468	down	yes
ENSRNOG00000016826	Pla2g2d	ENSRNOT00000022579	GO:0002361(CD4-positive, CD25-positive, alpha-beta regulatory T cell differentiation);GO:0004623(phospholipase A2 activity);GO:0005509(calcium ion binding);GO:0005576(extracellular region);GO:0008201(heparin binding);GO:0016042(lipid catabolic process);GO:0042130(negative regulation of T cell proliferation);GO:0043395(heparan sulfate proteoglycan binding);GO:0050868(negative regulation of T cell …	00564(Glycerophospholipid metabolism);00566(Ether lipid metabolism);00590(Arachidonic acid metabolism);00591(Linoleic acid metabolism);00592(alpha-Linolenic acid metabolism);04014(Ras signaling pathway);04270(Vascular smooth muscle contraction);04972(Pancreatic secretion);04975(Fat digestion and absorption)	K01047	EC:3.1.1.4	phospholipase A2, group IID [Rattus norvegicus]	1.94248	0.931022	0.42129	0.461004	3.25686	1.70348	0.0166001	0.398468	up	yes
ENSRNOG00000014882	Fgf11	ENSRNOT00000020152	GO:0005102(receptor binding);GO:0005576(extracellular region);GO:0005634(nucleus);GO:0008083(growth factor activity)	04014(Ras signaling pathway);04015(Rap1 signaling pathway);04010(MAPK signaling pathway);04151(PI3K-Akt signaling pathway);04810(Regulation of actin cytoskeleton);05200(Pathways in cancer);05218(Melanoma)	K04358	NA	fibroblast growth factor 11 isoform 1 [Mus musculus]	2.16328	1.10035	0.587455	0.586884	2.77912	1.47463	0.0169911	0.404264	up	yes
ENSRNOG00000049661	Inafm1	ENSRNOT00000071098	GO:0016021(integral component of membrane)	NA	NA	NA	putative transmembrane protein INAFM1 [Rattus norvegicus]	8.21676	9.46946	4.31081	4.06616	2.11129	1.07812	0.0169951	0.404264	up	yes
ENSRNOG00000021984	Rgs7	ENSRNOT00000065041	GO:0004871(signal transducer activity);GO:0005096(GTPase activator activity);GO:0005515(protein binding);GO:0005634(nucleus);GO:0005829(cytosol);GO:0005834(heterotrimeric G-protein complex);GO:0005886(plasma membrane);GO:0007186(G-protein coupled receptor signaling pathway);GO:0008277(regulation of G-protein coupled receptor protein signaling pathway);GO:0009968(negative regulation of signal tran…	04744(Phototransduction)	K13765	NA	regulator of G-protein signaling 7 [Rattus norvegicus]	0.800517	0.798622	0.284406	0.204762	3.2691	1.70889	0.0170109	0.404264	up	yes
ENSRNOG00000010977	Igfbp6	ENSRNOT00000014807	GO:0001558(regulation of cell growth);GO:0005615(extracellular space);GO:0005737(cytoplasm);GO:0005794(Golgi apparatus);GO:0008150(biological_process);GO:0031994(insulin-like growth factor I binding);GO:0031995(insulin-like growth factor II binding);GO:0043567(regulation of insulin-like growth factor receptor signaling pathway);GO:0070062(extracellular exosome)	04115(p53 signaling pathway)	K10138	NA	insulin-like growth factor-binding protein 6 precursor [Rattus norvegicus]	7.51738	11.9697	4.36924	0.421883	4.06733	2.02408	0.0170348	0.404264	up	yes
ENSRNOG00000022218	Ifi44	ENSRNOT00000084873;ENSRNOT00000029990	GO:0003674(molecular_function);GO:0005737(cytoplasm);GO:0008150(biological_process);GO:0008150(biological_process)	NA	NA	NA	interferon-induced protein 44 [Rattus norvegicus]	23.1124	6.57425	4.91444	7.29372	2.43171	1.28197	0.0170436	0.404264	up	yes
ENSRNOG00000000036	Klhdc8a	ENSRNOT00000000041	GO:0004842(ubiquitin-protein transferase activity);GO:0031463(Cul3-RING ubiquitin ligase complex);GO:0042787(protein ubiquitination involved in ubiquitin-dependent protein catabolic process)	NA	NA	NA	kelch domain containing 8A, isoform CRA_b, partial [Mus musculus]	2.43762	3.88464	0.357257	1.77995	2.95819	1.56471	0.017141	0.405772	up	yes
ENSRNOG00000055049	Aldh1a2	ENSRNOT00000079115	GO:0001568(blood vessel development);GO:0001758(retinal dehydrogenase activity);GO:0001822(kidney development);GO:0001889(liver development);GO:0001936(regulation of endothelial cell proliferation);GO:0002138(retinoic acid biosynthetic process);GO:0003007(heart morphogenesis);GO:0004028(3-chloroallyl aldehyde dehydrogenase activity);GO:0004029(aldehyde dehydrogenase (NAD) activity);GO:0005737(cyt…	00830(Retinol metabolism)	K07249	EC:1.2.1.36	retinal dehydrogenase 2 [Rattus norvegicus]	0.843247	1.37394	0.394437	0.283737	3.26935	1.709	0.0173688	0.410355	up	yes
ENSRNOG00000061450	Homer2	ENSRNOT00000087785	GO:0003779(actin binding);GO:0005515(protein binding);GO:0005634(nucleus);GO:0005730(nucleolus);GO:0005737(cytoplasm);GO:0005886(plasma membrane);GO:0007605(sensory perception of sound);GO:0008277(regulation of G-protein coupled receptor protein signaling pathway);GO:0014069(postsynaptic density);GO:0019904(protein domain specific binding);GO:0030054(cell junction);GO:0030160(GKAP/Homer scaffold …	04068(FoxO signaling pathway);04724(Glutamatergic synapse)	K15010	NA	homer protein homolog 2 [Rattus norvegicus]	1.42045	1.24555	3.73341	2.83967	0.405593	-1.3019	0.0174168	0.410681	down	yes
ENSRNOG00000055365	Edem1	ENSRNOT00000088273	GO:0001948(glycoprotein binding);GO:0004559(alpha-mannosidase activity);GO:0004571(mannosyl-oligosaccharide 1,2-alpha-mannosidase activity);GO:0005509(calcium ion binding);GO:0005783(endoplasmic reticulum);GO:0006491(N-glycan processing);GO:0030176(integral component of endoplasmic reticulum membrane);GO:0030433(ER-associated ubiquitin-dependent protein catabolic process);GO:0030968(endoplasmic r…	04141(Protein processing in endoplasmic reticulum)	K10084	NA	mKIAA0212 protein, partial [Mus musculus]	6.39397	7.23548	10.7049	17.3067	0.486566	-1.03929	0.0176436	0.413506	down	yes
ENSRNOG00000037371	Xaf1	ENSRNOT00000056551	GO:0005515(protein binding);GO:0005634(nucleus);GO:0006915(apoptotic process);GO:0031333(negative regulation of protein complex assembly);GO:0035456(response to interferon-beta)	NA	NA	NA	PREDICTED: XIAP-associated factor 1 [Rattus norvegicus]	9.03072	1.15231	0.733603	1.56589	4.42839	2.14678	0.0176664	0.413506	up	yes
ENSRNOG00000061910	Igfbp3	ENSRNOT00000088355	GO:0001558(regulation of cell growth);GO:0001649(osteoblast differentiation);GO:0001933(negative regulation of protein phosphorylation);GO:0001968(fibronectin binding);GO:0005515(protein binding);GO:0005520(insulin-like growth factor binding);GO:0005615(extracellular space);GO:0005634(nucleus);GO:0005720(nuclear heterochromatin);GO:0006468(protein phosphorylation);GO:0007568(aging);GO:0008160(pro…	04115(p53 signaling pathway);05202(Transcriptional misregulation in cancers)	K10138	NA	insulin-like growth factor-binding protein 3 precursor [Rattus norvegicus]	9.6686	18.8712	28.6727	34.081	0.454791	-1.13672	0.0176744	0.413506	down	yes
ENSRNOG00000028993	LOC102555453	ENSRNOT00000042736	GO:0000027(ribosomal large subunit assembly);GO:0003735(structural constituent of ribosome);GO:0005634(nucleus);GO:0005730(nucleolus);GO:0005737(cytoplasm);GO:0005840(ribosome);GO:0005925(focal adhesion);GO:0006412(translation);GO:0016020(membrane);GO:0022625(cytosolic large ribosomal subunit);GO:0044822(poly(A) RNA binding);GO:0045901(positive regulation of translational elongation);GO:0070062(e…	03010(Ribosome)	K02870	NA	60S ribosomal protein L12 [Rattus norvegicus]	256.345	215.316	147.754	60.0931	2.26927	1.18223	0.017843	0.416638	up	yes
ENSRNOG00000004698	Cd244	ENSRNOT00000006266;ENSRNOT00000000053	GO:0001773(myeloid dendritic cell activation);GO:0002323(natural killer cell activation involved in immune response);GO:0004872(receptor activity);GO:0009897(external side of plasma membrane);GO:0016021(integral component of membrane);GO:0032819(positive regulation of natural killer cell proliferation);GO:0042288(MHC class I protein binding);GO:0060732(positive regulation of inositol phosphate bi…	04650(Natural killer cell mediated cytotoxicity);04650(Natural killer cell mediated cytotoxicity)	K06582	NA	natural killer cell receptor 2B4 precursor [Rattus norvegicus]	1.90169	0.467088	0.307555	0.309709	3.83754	1.94018	0.0178945	0.416979	up	yes
ENSRNOG00000060130	Ypel4	ENSRNOT00000083592	GO:0003674(molecular_function);GO:0005575(cellular_component);GO:0005634(nucleus);GO:0008150(biological_process);GO:0046872(metal ion binding)	04010(MAPK signaling pathway);04012(ErbB signaling pathway);04350(TGF-beta signaling pathway);04370(VEGF signaling pathway);04068(FoxO signaling pathway);04150(mTOR signaling pathway);04810(Regulation of actin cytoskeleton);04114(Oocyte meiosis);04510(Focal adhesion);04520(Adherens junction);04540(Gap junction);04620(Toll-like receptor signaling pathway);04621(NOD-like receptor signaling pathway)…	K04371	EC:2.7.11.24	PREDICTED: protein yippee-like 4 [Cavia porcellus]	0.299651	0.39544	0.10377	0.086594	3.65138	1.86844	0.0179619	0.416979	up	yes
ENSRNOG00000027990	Crip1	ENSRNOT00000006835	GO:0003680(AT DNA binding);GO:0005737(cytoplasm);GO:0008270(zinc ion binding);GO:0008301(DNA binding, bending);GO:0008630(intrinsic apoptotic signaling pathway in response to DNA damage);GO:0010043(response to zinc ion);GO:0042277(peptide binding);GO:0071236(cellular response to antibiotic);GO:0071493(cellular response to UV-B)	04391(Hippo signaling pathway -fly)	K09851	NA	rCG27793, isoform CRA_c [Rattus norvegicus]	28.5408	23.4509	12.3586	12.13	2.1231	1.08617	0.0179983	0.417019	up	yes
ENSRNOG00000052301	AABR07044390.1	ENSRNOT00000077832	NA	NA	NA	NA		40.7059	27.3244	5.59642	14.1601	3.44343	1.78385	0.0181026	0.418627	up	yes
ENSRNOG00000016957	Igfbp2	ENSRNOT00000023068	GO:0001558(regulation of cell growth);GO:0005520(insulin-like growth factor binding);GO:0005576(extracellular region);GO:0005615(extracellular space);GO:0007165(signal transduction);GO:0007275(multicellular organism development);GO:0007565(female pregnancy);GO:0007568(aging);GO:0007584(response to nutrient);GO:0009612(response to mechanical stimulus);GO:0010226(response to lithium ion);GO:0016324…	04115(p53 signaling pathway);05202(Transcriptional misregulation in cancers)	K10138	NA	insulin-like growth factor-binding protein 2 precursor [Rattus norvegicus]	52.2543	59.8606	28.3156	2.57598	3.6293	1.85969	0.0181527	0.418979	up	yes
ENSRNOG00000012034	Ces2i	ENSRNOT00000015997	GO:0005615(extracellular space);GO:0016787(hydrolase activity);GO:0052689(carboxylic ester hydrolase activity)	00983(Drug metabolism - other enzymes)	K03927	EC:3.1.1.1;EC:3.1.1.84	PREDICTED: pyrethroid hydrolase Ces2a isoform X2 [Rattus norvegicus]	0.0421673	0.552578	1.76045	1.40118	0.188113	-2.41033	0.0182581	0.420601	down	yes
ENSRNOG00000047295	Prr22	ENSRNOT00000075201	GO:0002943(tRNA dihydrouridine synthesis);GO:0005829(cytosol);GO:0017150(tRNA dihydrouridine synthase activity);GO:0044822(poly(A) RNA binding);GO:0046872(metal ion binding);GO:0050660(flavin adenine dinucleotide binding);GO:0055114(oxidation-reduction process)	NA	NA	NA	PREDICTED: proline-rich protein 22 isoform X1 [Rattus norvegicus]	5.95195	4.4664	1.1036	3.17256	2.43638	1.28474	0.0183898	0.42217	up	yes
ENSRNOG00000014328	Frs3	ENSRNOT00000019404	GO:0000186(activation of MAPKK activity);GO:0005104(fibroblast growth factor receptor binding);GO:0005158(insulin receptor binding);GO:0005886(plasma membrane);GO:0008543(fibroblast growth factor receptor signaling pathway);GO:0042802(identical protein binding)	04722(Neurotrophin signaling pathway);05205(Proteoglycans in cancer)	K12461	NA	PREDICTED: fibroblast growth factor receptor substrate 3 isoform X1 [Rattus norvegicus]	8.41099	11.2202	5.41849	4.17549	2.0462	1.03295	0.0185385	0.422547	up	yes
ENSRNOG00000003977	Dusp1	ENSRNOT00000005383	GO:0000188(inactivation of MAPK activity);GO:0001706(endoderm formation);GO:0004725(protein tyrosine phosphatase activity);GO:0005634(nucleus);GO:0005737(cytoplasm);GO:0006470(protein dephosphorylation);GO:0008330(protein tyrosine/threonine phosphatase activity);GO:0009416(response to light stimulus);GO:0010033(response to organic substance);GO:0017017(MAP kinase tyrosine/serine/threonine phospha…	04010(MAPK signaling pathway);04726(Serotonergic synapse)	K04459	EC:3.1.3.16;EC:3.1.3.48	dual specificity protein phosphatase 1 [Rattus norvegicus]	314.757	252.792	163.44	114.364	2.04298	1.03067	0.0185712	0.422547	up	yes
ENSRNOG00000030170	Krt10	ENSRNOT00000081709;ENSRNOT00000036023	GO:0005198(structural molecule activity);GO:0005615(extracellular space);GO:0005634(nucleus);GO:0005737(cytoplasm);GO:0005882(intermediate filament);GO:0016020(membrane);GO:0030216(keratinocyte differentiation);GO:0070062(extracellular exosome);GO:0003334(keratinocyte development);GO:0003674(molecular_function);GO:0005575(cellular_component);GO:0008092(cytoskeletal protein binding);GO:0008150(bio…	05150(Staphylococcus aureus infection);05150(Staphylococcus aureus infection)	K07604	NA	PREDICTED: keratin, type I cytoskeletal 10 isoform X2 [Rattus norvegicus]	1.60358	2.33201	0.856991	0.546798	2.80355	1.48725	0.0185776	0.422547	up	yes
ENSRNOG00000048302	LOC100910979	ENSRNOT00000073388	GO:0005525(GTP binding);GO:0016020(membrane)	04668(TNF signaling pathway)	K17072	NA	PREDICTED: interferon-inducible GTPase 1-like [Rattus norvegicus]	14.8098	5.04063	4.43969	3.39221	2.53456	1.34173	0.018589	0.422547	up	yes
ENSRNOG00000011881	Slc25a15	ENSRNOT00000078971;ENSRNOT00000050637	GO:0000064(L-ornithine transmembrane transporter activity);GO:0003735(structural constituent of ribosome);GO:0005739(mitochondrion);GO:0005743(mitochondrial inner membrane);GO:0006412(translation);GO:0006810(transport);GO:0016020(membrane);GO:0016021(integral component of membrane);GO:0003674(molecular_function);GO:0005575(cellular_component);GO:0008150(biological_process);GO:0008150(biological_p…	03320(PPAR signaling pathway);05016(Huntington's disease);05016(Huntington's disease)	K08769	NA	mitochondrial ornithine transporter 1 [Rattus norvegicus]	23.8592	31.2376	48.6574	65.0234	0.484662	-1.04495	0.0187253	0.424679	down	yes
ENSRNOG00000053387	AABR07013288.4	ENSRNOT00000091475	GO:0003674(molecular_function);GO:0005575(cellular_component);GO:0008150(biological_process);GO:0008270(zinc ion binding);GO:0016020(membrane);GO:0016021(integral component of membrane)	03013(RNA transport);03015(mRNA surveillance pathway)	K14326	EC:3.6.4.-	PREDICTED: protein ZGRF1 isoform X10 [Rattus norvegicus]	1.78221	1.35099	0.438715	0.411901	3.68344	1.88105	0.0187535	0.424679	up	yes
ENSRNOG00000003486	Mnda	ENSRNOT00000036040	GO:0003690(double-stranded DNA binding);GO:0003712(transcription cofactor activity);GO:0006357(regulation of transcription from RNA polymerase II promoter);GO:0006974(cellular response to DNA damage stimulus);GO:0030889(negative regulation of B cell proliferation);GO:0035458(cellular response to interferon-beta);GO:0043065(positive regulation of apoptotic process);GO:0045669(positive regulation o…	04623(Cytosolic DNA-sensing pathway)	K12971	NA	myeloid cell nuclear differentiation antigen [Rattus norvegicus]	14.0245	4.16535	3.85187	3.21055	2.57558	1.3649	0.0188868	0.42689	up	yes
ENSRNOG00000014948	Osgin1	ENSRNOT00000079240;ENSRNOT00000020225	GO:0008083(growth factor activity);GO:0016491(oxidoreductase activity);GO:0030308(negative regulation of cell growth);GO:0043065(positive regulation of apoptotic process);GO:0055114(oxidation-reduction process);GO:0055114(oxidation-reduction process)	NA	NA	NA	oxidative stress-induced growth inhibitor 1 [Rattus norvegicus]	195.987	392.743	142.324	134.134	2.12954	1.09054	0.0190024	0.428253	up	yes
ENSRNOG00000034013	Acaca	ENSRNOT00000088138;ENSRNOT00000041140	GO:0001894(tissue homeostasis);GO:0003989(acetyl-CoA carboxylase activity);GO:0004075(biotin carboxylase activity);GO:0005524(ATP binding);GO:0005730(nucleolus);GO:0005737(cytoplasm);GO:0005739(mitochondrion);GO:0005829(cytosol);GO:0006084(acetyl-CoA metabolic process);GO:0006629(lipid metabolic process);GO:0006633(fatty acid biosynthetic process);GO:0009374(biotin binding);GO:0014070(response to…	01212(Fatty acid metabolism);00620(Pyruvate metabolism);00640(Propanoate metabolism);00061(Fatty acid biosynthesis);00254(Aflatoxin biosynthesis);04152(AMPK signaling pathway);04910(Insulin signaling pathway);04922(Glucagon signaling pathway);04922(Glucagon signaling pathway)	K11262	EC:6.4.1.2;EC:6.3.4.14	acetyl-coenzyme A carboxylase alpha, isoform CRA_b [Rattus norvegicus]	1.72034	1.68931	2.6367	4.34055	0.488682	-1.03303	0.01902	0.428253	down	yes
ENSRNOG00000016507	LOC687679	ENSRNOT00000022367	GO:0000387(spliceosomal snRNP assembly);GO:0000398(mRNA splicing, via spliceosome);GO:0003723(RNA binding);GO:0005682(U5 snRNP);GO:0005683(U7 snRNP);GO:0005685(U1 snRNP);GO:0005686(U2 snRNP);GO:0005687(U4 snRNP);GO:0005689(U12-type spliceosomal complex);GO:0005732(small nucleolar ribonucleoprotein complex);GO:0005829(cytosol);GO:0034709(methylosome);GO:0034719(SMN-Sm protein complex);GO:0043186(P…	03040(Spliceosome)	K11099	NA	small nuclear ribonucleoprotein G isoform a [Homo sapiens]	40.5924	34.057	20.3966	15.3432	2.08869	1.0626	0.0190541	0.428253	up	yes
ENSRNOG00000023459	Lurap1	ENSRNOT00000035348	GO:0001819(positive regulation of cytokine production);GO:0005515(protein binding);GO:0005737(cytoplasm);GO:0016477(cell migration);GO:0031032(actomyosin structure organization);GO:0042641(actomyosin);GO:0043123(positive regulation of I-kappaB kinase/NF-kappaB signaling)	03440(Homologous recombination)	K10875	EC:3.6.4.-	leucine rich adaptor protein 1 [Rattus norvegicus]	0.275118	0.382544	1.02289	1.29046	0.28429	-1.81457	0.0194029	0.434537	down	yes
ENSRNOG00000013673	Msh3	ENSRNOT00000018449	GO:0000228(nuclear chromosome);GO:0000710(meiotic mismatch repair);GO:0003674(molecular_function);GO:0003677(DNA binding);GO:0003684(damaged DNA binding);GO:0003697(single-stranded DNA binding);GO:0005524(ATP binding);GO:0005575(cellular_component);GO:0006281(DNA repair);GO:0006298(mismatch repair);GO:0007131(reciprocal meiotic recombination);GO:0008150(biological_process);GO:0016020(membrane);GO…	03430(Mismatch repair);05200(Pathways in cancer);05210(Colorectal cancer)	K08736	NA	PREDICTED: DNA mismatch repair protein Msh3 isoform X1 [Rattus norvegicus]	3.14685	4.12643	6.63721	8.03168	0.495831	-1.01208	0.0194061	0.434537	down	yes
ENSRNOG00000024277	AABR07035470.1	ENSRNOT00000092808;ENSRNOT00000092970;ENSRNOT00000051382	GO:0001772(immunological synapse);GO:0001819(positive regulation of cytokine production);GO:0003674(molecular_function);GO:0005575(cellular_component);GO:0005737(cytoplasm);GO:0005886(plasma membrane);GO:0007165(signal transduction);GO:0008150(biological_process);GO:0030890(positive regulation of B cell proliferation);GO:0031295(T cell costimulation);GO:0042101(T cell receptor complex);GO:0042102…	04064(NF-kappa B signaling pathway);04660(T cell receptor signaling pathway);04662(B cell receptor signaling pathway);04662(B cell receptor signaling pathway)	K07367	NA	PREDICTED: LOW QUALITY PROTEIN: caspase recruitment domain-containing protein 11 isoform X2 [Rattus norvegicus]	1.08275	0.335107	0.205594	0.205034	3.4529	1.78781	0.0195847	0.43772	up	yes
ENSRNOG00000005825	Lyz2	ENSRNOT00000007747	GO:0000137(Golgi cis cisterna);GO:0001895(retina homeostasis);GO:0003796(lysozyme activity);GO:0005576(extracellular region);GO:0005615(extracellular space);GO:0005737(cytoplasm);GO:0005788(endoplasmic reticulum lumen);GO:0005795(Golgi stack);GO:0005902(microvillus);GO:0016798(hydrolase activity, acting on glycosyl bonds);GO:0019835(cytolysis);GO:0030140(trans-Golgi network transport vesicle);GO:…	04970(Salivary secretion)	K13915	EC:3.2.1.17	TPA: lysozyme f2 [Rattus norvegicus]	88.192	22.4784	22.2275	23.2654	2.4327	1.28256	0.0196679	0.438457	up	yes
ENSRNOG00000030316	Otogl	ENSRNOT00000043774	GO:0005576(extracellular region);GO:0007605(sensory perception of sound);GO:0046373(L-arabinose metabolic process);GO:0046556(alpha-L-arabinofuranosidase activity)	04512(ECM-receptor interaction);04510(Focal adhesion)	K03900	NA	PREDICTED: otogelin-like protein isoform X1 [Rattus norvegicus]	0.194336	0.543801	0.557799	1.91425	0.298593	-1.74375	0.0196908	0.438457	down	yes
ENSRNOG00000033979	Gm5471	ENSRNOT00000049520	GO:0003674(molecular_function);GO:0003743(translation initiation factor activity);GO:0005575(cellular_component);GO:0006412(translation);GO:0006413(translational initiation);GO:0009048(dosage compensation by inactivation of X chromosome)	03013(RNA transport)	K03113	NA	Eukaryotic translation initiation factor 1, partial [Ophiophagus hannah]	3.20688	2.29628	9.39349	7.27209	0.330211	-1.59854	0.019742	0.438785	down	yes
ENSRNOG00000053812	LOC103689947	ENSRNOT00000088465	GO:0005615(extracellular space);GO:0005634(nucleus);GO:0005730(nucleolus);GO:0005829(cytosol);GO:0008430(selenium binding);GO:0015031(protein transport);GO:0016020(membrane);GO:0050873(brown fat cell differentiation);GO:0070062(extracellular exosome)	NA	NA	NA	selenium-binding protein 1 [Rattus norvegicus]	25.6366	38.1695	73.1356	59.6975	0.480348	-1.05785	0.0199247	0.439988	down	yes
ENSRNOG00000003472	Atp11c	ENSRNOT00000051319	GO:0000287(magnesium ion binding);GO:0002329(pre-B cell differentiation);GO:0004012(phospholipid-translocating ATPase activity);GO:0005524(ATP binding);GO:0005765(lysosomal membrane);GO:0005783(endoplasmic reticulum);GO:0005886(plasma membrane);GO:0016021(integral component of membrane);GO:0045332(phospholipid translocation);GO:0045579(positive regulation of B cell differentiation);GO:0055037(rec…	04020(Calcium signaling pathway);04024(cAMP signaling pathway);04022(cGMP - PKG signaling pathway);04261(Adrenergic signaling in cardiomyocytes);04970(Salivary secretion);04972(Pancreatic secretion)	K05850	EC:3.6.3.8	PREDICTED: phospholipid-transporting ATPase IG isoform X1 [Rattus norvegicus]	0.155328	0.3631	1.21965	0.60152	0.284667	-1.81265	0.0199428	0.439988	down	yes
ENSRNOG00000014179	Rps2	ENSRNOT00000019508	GO:0003723(RNA binding);GO:0003735(structural constituent of ribosome);GO:0006412(translation);GO:0022627(cytosolic small ribosomal subunit)	03010(Ribosome)	K02981	NA	LOC100037089 protein, partial [Xenopus laevis]	219.046	127.397	268.484	463.808	0.473094	-1.0798	0.0200506	0.441172	down	yes
ENSRNOG00000018467	Mitd1	ENSRNOT00000024959;ENSRNOT00000090870	GO:0000281(mitotic cytokinesis);GO:0000920(cell separation after cytokinesis);GO:0006810(transport);GO:0019898(extrinsic component of membrane);GO:0019904(protein domain specific binding);GO:0030496(midbody);GO:0031902(late endosome membrane);GO:0032091(negative regulation of protein binding);GO:0035091(phosphatidylinositol binding);GO:0039702(viral budding via host ESCRT complex);GO:0042803(prot…	NA	NA	NA	MIT domain-containing protein 1 [Rattus norvegicus]	18.2515	6.41404	3.27735	6.81546	2.44387	1.28917	0.02007	0.441172	up	yes
ENSRNOG00000032585	AABR07048992.1	ENSRNOT00000041306	GO:0000151(ubiquitin ligase complex);GO:0000166(nucleotide binding);GO:0000974(Prp19 complex);GO:0001664(G-protein coupled receptor binding);GO:0001786(phosphatidylserine binding);GO:0001916(positive regulation of T cell mediated cytotoxicity);GO:0001917(photoreceptor inner segment);GO:0003723(RNA binding);GO:0005102(receptor binding);GO:0005515(protein binding);GO:0005524(ATP binding);GO:0005615…	03040(Spliceosome);04141(Protein processing in endoplasmic reticulum);04010(MAPK signaling pathway);04144(Endocytosis);04612(Antigen processing and presentation);04915(Estrogen signaling pathway);04213(Longevity regulating pathway - multiple species);05134(Legionellosis);05162(Measles);05164(Influenza A);05169(Epstein-Barr virus infection);05145(Toxoplasmosis)	K03283	NA	Heat shock cognate 71 kDa protein [Fukomys damarensis]	93.1146	17.1403	25.7092	6.48822	3.42435	1.77583	0.0201227	0.441523	up	yes
ENSRNOG00000002188	Hpse	ENSRNOT00000002983	GO:0003674(molecular_function);GO:0005575(cellular_component);GO:0005576(extracellular region);GO:0005634(nucleus);GO:0005654(nucleoplasm);GO:0005764(lysosome);GO:0005765(lysosomal membrane);GO:0005975(carbohydrate metabolic process);GO:0007155(cell adhesion);GO:0007160(cell-matrix adhesion);GO:0008150(biological_process);GO:0010575(positive regulation of vascular endothelial growth factor produc…	00531(Glycosaminoglycan degradation);05205(Proteoglycans in cancer)	K07964	EC:3.2.1.166	heparanase precursor [Rattus norvegicus]	0.394512	0.177258	1.10113	0.894255	0.286546	-1.80316	0.0202687	0.443913	down	yes
ENSRNOG00000049489	LOC102552166	ENSRNOT00000074641	GO:0000166(nucleotide binding);GO:0003677(DNA binding);GO:0003712(transcription cofactor activity);GO:0004386(helicase activity);GO:0005515(protein binding);GO:0005524(ATP binding);GO:0005634(nucleus);GO:0016607(nuclear speck);GO:0016787(hydrolase activity);GO:0016887(ATPase activity);GO:0019901(protein kinase binding);GO:0045944(positive regulation of transcription from RNA polymerase II promote…	03440(Homologous recombination)	K10875	EC:3.6.4.-	PREDICTED: LOW QUALITY PROTEIN: helicase ARIP4-like, partial [Rattus norvegicus]	0.442162	0.385185	1.17848	1.1393	0.356957	-1.48618	0.0203174	0.44417	down	yes
ENSRNOG00000029543	Cish	ENSRNOT00000040056	GO:0004860(protein kinase inhibitor activity);GO:0005622(intracellular);GO:0005737(cytoplasm);GO:0005886(plasma membrane);GO:0006469(negative regulation of protein kinase activity);GO:0007205(protein kinase C-activating G-protein coupled receptor signaling pathway);GO:0016567(protein ubiquitination);GO:0019221(cytokine-mediated signaling pathway);GO:0035556(intracellular signal transduction);GO:0…	04630(Jak-STAT signaling pathway);04917(Prolactin signaling pathway)	K04701	NA	cytokine-inducible SH2-containing protein [Rattus norvegicus]	11.6087	3.39729	26.8306	10.971	0.396967	-1.33291	0.0208776	0.454761	down	yes
ENSRNOG00000046699	Slpi	ENSRNOT00000076191	GO:0004866(endopeptidase inhibitor activity);GO:0005576(extracellular region);GO:0010951(negative regulation of endopeptidase activity)	NA	NA	NA	rCG32428, isoform CRA_a [Rattus norvegicus]	3.31645	1.50792	4.077	9.79905	0.347676	-1.52418	0.0209442	0.455385	down	yes
ENSRNOG00000058068	Obscn	ENSRNOT00000087926;ENSRNOT00000084697	GO:0004672(protein kinase activity);GO:0005089(Rho guanyl-nucleotide exchange factor activity);GO:0005515(protein binding);GO:0005524(ATP binding);GO:0006468(protein phosphorylation);GO:0030017(sarcomere);GO:0030018(Z disc);GO:0030506(ankyrin binding);GO:0031430(M band);GO:0031432(titin binding);GO:0035023(regulation of Rho protein signal transduction);GO:0043547(positive regulation of GTPase act…	05410(Hypertrophic cardiomyopathy (HCM));05414(Dilated cardiomyopathy (DCM));05414(Dilated cardiomyopathy (DCM))	K12567	EC:2.7.11.1	obscurin isoform 2 [Mus musculus]	0.0784403	0.11061	0.0116033	0.0437082	3.41791	1.77312	0.0210856	0.45697	up	yes
ENSRNOG00000007234	Cyp51	ENSRNOT00000009985	GO:0005506(iron ion binding);GO:0005783(endoplasmic reticulum);GO:0005789(endoplasmic reticulum membrane);GO:0005886(plasma membrane);GO:0006694(steroid biosynthetic process);GO:0008398(sterol 14-demethylase activity);GO:0016020(membrane);GO:0016021(integral component of membrane);GO:0020037(heme binding);GO:0033488(cholesterol biosynthetic process via 24,25-dihydrolanosterol);GO:0043231(intracel…	00100(Steroid biosynthesis)	K05917	EC:1.14.13.70	lanosterol 14-alpha demethylase [Rattus norvegicus]	30.9851	23.2067	65.5857	43.1699	0.49829	-1.00494	0.0210933	0.45697	down	yes
ENSRNOG00000021463	Ppara	ENSRNOT00000030082;ENSRNOT00000078928	GO:0000122(negative regulation of transcription from RNA polymerase II promoter);GO:0000978(RNA polymerase II core promoter proximal region sequence-specific DNA binding);GO:0001077(transcriptional activator activity, RNA polymerase II core promoter proximal region sequence-specific binding);GO:0001078(transcriptional repressor activity, RNA polymerase II core promoter proximal region sequence-sp…	04024(cAMP signaling pathway);04922(Glucagon signaling pathway);04920(Adipocytokine signaling pathway);03320(PPAR signaling pathway);04932(Non-alcoholic fatty liver disease (NAFLD));04931(Insulin resistance);05160(Hepatitis C);05160(Hepatitis C)	K07294	NA	PREDICTED: peroxisome proliferator-activated receptor alpha isoform X2 [Rattus norvegicus]	2.08136	1.37222	3.97362	3.95325	0.43568	-1.19866	0.0211621	0.457636	down	yes
ENSRNOG00000060267	RF00016	ENSRNOT00000080953	NA	NA	NA	NA		17.2235	51.352	9.42002	11.491	3.27939	1.71343	0.0214076	0.459906	up	yes
ENSRNOG00000057327	AABR07065118.1	ENSRNOT00000091235	NA	NA	NA	NA	mCG146147, partial [Mus musculus]	2.44373	4.81944	0.796541	1.35299	3.37896	1.75658	0.0218687	0.467858	up	yes
ENSRNOG00000048553	Iqcc	ENSRNOT00000074345	GO:0003674(molecular_function);GO:0005575(cellular_component);GO:0008150(biological_process)	NA	NA	NA	PREDICTED: LOW QUALITY PROTEIN: IQ domain-containing protein C [Rattus norvegicus]	8.89325	7.79012	4.6038	2.94142	2.21112	1.14478	0.0220523	0.470947	up	yes
ENSRNOG00000036837	Nfe2	ENSRNOT00000055281	GO:0000976(transcription regulatory region sequence-specific DNA binding);GO:0003700(transcription factor activity, sequence-specific DNA binding);GO:0005634(nucleus);GO:0005654(nucleoplasm);GO:0005737(cytoplasm);GO:0006351(transcription, DNA-templated);GO:0006357(regulation of transcription from RNA polymerase II promoter);GO:0007267(cell-cell signaling);GO:0008285(negative regulation of cell pr…	04141(Protein processing in endoplasmic reticulum)	K05638	NA	nuclear factor, erythroid derived 2, isoform CRA_a, partial [Mus musculus]	0.939402	1.42844	3.77382	2.54637	0.374647	-1.4164	0.0221934	0.472416	down	yes
ENSRNOG00000047697	Ggt1	ENSRNOT00000093521;ENSRNOT00000074533	GO:0002682(regulation of immune system process);GO:0003840(gamma-glutamyltransferase activity);GO:0005615(extracellular space);GO:0005886(plasma membrane);GO:0005887(integral component of plasma membrane);GO:0006536(glutamate metabolic process);GO:0006750(glutathione biosynthetic process);GO:0006751(glutathione catabolic process);GO:0007283(spermatogenesis);GO:0007568(aging);GO:0019344(cysteine b…	00590(Arachidonic acid metabolism);00430(Taurine and hypotaurine metabolism);00460(Cyanoamino acid metabolism);00480(Glutathione metabolism);00480(Glutathione metabolism)	K18592	EC:2.3.2.2;EC:3.4.19.13	gamma-glutamyltranspeptidase 1 [Rattus norvegicus]	0.514466	0.218647	1.58611	0.906176	0.294153	-1.76536	0.0222527	0.472701	down	yes
ENSRNOG00000012331	Casp8	ENSRNOT00000016613;ENSRNOT00000084498	GO:0001525(angiogenesis);GO:0001841(neural tube formation);GO:0004175(endopeptidase activity);GO:0004197(cysteine-type endopeptidase activity);GO:0005123(death receptor binding);GO:0005164(tumor necrosis factor receptor binding);GO:0005515(protein binding);GO:0005634(nucleus);GO:0005654(nucleoplasm);GO:0005737(cytoplasm);GO:0005739(mitochondrion);GO:0005815(microtubule organizing center);GO:00058…	04668(TNF signaling pathway);04210(Apoptosis);04215(Apoptosis - multiple species);04115(p53 signaling pathway);04620(Toll-like receptor signaling pathway);04621(NOD-like receptor signaling pathway);04622(RIG-I-like receptor signaling pathway);05200(Pathways in cancer);05203(Viral carcinogenesis);05010(Alzheimer's disease);05016(Huntington's disease);05416(Viral myocarditis);04932(Non-alcoholic fa…	K04398	EC:3.4.22.61	PREDICTED: caspase-8 isoform X1 [Rattus norvegicus]	7.27287	5.02584	3.2849	2.43167	2.15141	1.10528	0.0223023	0.472918	up	yes
ENSRNOG00000003453	Lypd1	ENSRNOT00000004741	GO:0001662(behavioral fear response);GO:0001775(cell activation);GO:0005576(extracellular region);GO:0005886(plasma membrane);GO:0007271(synaptic transmission, cholinergic);GO:0016020(membrane);GO:0030550(acetylcholine receptor inhibitor activity);GO:0031225(anchored component of membrane);GO:0033130(acetylcholine receptor binding);GO:0035094(response to nicotine);GO:1903077(negative regulation o…	04020(Calcium signaling pathway);04080(Neuroactive ligand-receptor interaction)	K04211	NA	ly6/PLAUR domain-containing protein 1 precursor [Rattus norvegicus]	4.40182	3.07364	1.71791	1.54092	2.29391	1.19781	0.0224728	0.475695	up	yes
ENSRNOG00000039494	Aass	ENSRNOT00000060530	GO:0003674(molecular_function);GO:0005575(cellular_component);GO:0005739(mitochondrion);GO:0008150(biological_process);GO:0019477(L-lysine catabolic process);GO:0033512(L-lysine catabolic process to acetyl-CoA via saccharopine);GO:0043231(intracellular membrane-bounded organelle);GO:0047130(saccharopine dehydrogenase (NADP+, L-lysine-forming) activity);GO:0047131(saccharopine dehydrogenase (NAD+,…	00310(Lysine degradation)	K14157	EC:1.5.1.8;EC:1.5.1.9	alpha-aminoadipic semialdehyde synthase, mitochondrial precursor [Rattus norvegicus]	8.61937	14.2362	11.9553	48.4155	0.378587	-1.4013	0.0225315	0.475949	down	yes
ENSRNOG00000020480	Fads1	ENSRNOT00000027834	GO:0005634(nucleus);GO:0005739(mitochondrion);GO:0005789(endoplasmic reticulum membrane);GO:0006636(unsaturated fatty acid biosynthetic process);GO:0007568(aging);GO:0007584(response to nutrient);GO:0009267(cellular response to starvation);GO:0009744(response to sucrose);GO:0010033(response to organic substance);GO:0014070(response to organic cyclic compound);GO:0016020(membrane);GO:0016021(integ…	01212(Fatty acid metabolism);01040(Biosynthesis of unsaturated fatty acids)	K10224	EC:1.14.19.44	fatty acid desaturase 1 [Rattus norvegicus]	49.2964	53.6606	134.882	78.4373	0.482642	-1.05097	0.0225865	0.475949	down	yes
ENSRNOG00000036701	LOC100361457	ENSRNOT00000054976	GO:0005524(ATP binding);GO:0005856(cytoskeleton);GO:0005886(plasma membrane);GO:0005925(focal adhesion);GO:0097433(dense body)	04015(Rap1 signaling pathway);04390(Hippo signaling pathway);04145(Phagosome);04810(Regulation of actin cytoskeleton);04210(Apoptosis);04510(Focal adhesion);04520(Adherens junction);04530(Tight junction);04611(Platelet activation);04670(Leukocyte transendothelial migration);04921(Oxytocin signaling pathway);04919(Thyroid hormone signaling pathway);05205(Proteoglycans in cancer);05410(Hypertrophic…	K05692	NA	Actin, cytoplasmic 2 [Tupaia chinensis]	99.7015	45.6813	41.9859	24.8419	2.17548	1.12134	0.022622	0.475949	up	yes
ENSRNOG00000000053	Crp	ENSRNOT00000000058;ENSRNOT00000091089	GO:0000733(DNA strand renaturation);GO:0003677(DNA binding);GO:0005507(copper ion binding);GO:0005524(ATP binding);GO:0005634(nucleus);GO:0005730(nucleolus);GO:0005737(cytoplasm);GO:0005739(mitochondrion);GO:0006289(nucleotide-excision repair);GO:0007275(multicellular organism development);GO:0007569(cell aging);GO:0030308(negative regulation of cell growth);GO:0090200(positive regulation of rele…	NA	NA	NA	C-reactive protein precursor [Rattus norvegicus]	576.838	417.571	1265.92	769.618	0.488523	-1.0335	0.0226435	0.475949	down	yes
ENSRNOG00000054489	AABR07042821.1	ENSRNOT00000078975	GO:0002181(cytoplasmic translation);GO:0003735(structural constituent of ribosome);GO:0022625(cytosolic large ribosomal subunit)	03010(Ribosome)	K02920	NA	PREDICTED: uncharacterized protein LOC102862726 [Elephantulus edwardii]	92.6135	22.4616	26.6015	17.6578	2.60002	1.37852	0.0227773	0.4778	up	yes
ENSRNOG00000030387	Kng1	ENSRNOT00000084867;ENSRNOT00000080949;ENSRNOT00000080562;ENSRNOT00000078131;ENSRNOT00000058479	GO:0004869(cysteine-type endopeptidase inhibitor activity);GO:0005102(receptor binding);GO:0005615(extracellular space);GO:0005829(cytosol);GO:0006953(acute-phase response);GO:0007162(negative regulation of cell adhesion);GO:0007204(positive regulation of cytosolic calcium ion concentration);GO:0010951(negative regulation of endopeptidase activity);GO:0030195(negative regulation of blood coagulat…	04610(Complement and coagulation cascades);04610(Complement and coagulation cascades)	K03898	NA	T-kininogen 2 precursor [Rattus norvegicus]	2365.99	863.996	911.059	350.599	2.56011	1.35621	0.0228111	0.4778	up	yes
ENSRNOG00000019661	Gdf15	ENSRNOT00000026652	GO:0005125(cytokine activity);GO:0005160(transforming growth factor beta receptor binding);GO:0005615(extracellular space);GO:0008083(growth factor activity);GO:0010862(positive regulation of pathway-restricted SMAD protein phosphorylation);GO:0042981(regulation of apoptotic process);GO:0043408(regulation of MAPK cascade);GO:0048468(cell development);GO:0060395(SMAD protein signal transduction);G…	04350(TGF-beta signaling pathway)	K04666	NA	growth differentiation factor 15 [Rattus norvegicus]	33.1413	86.2386	30.1691	25.2546	2.15395	1.10698	0.0229726	0.480343	up	yes
ENSRNOG00000007839	Slc16a7	ENSRNOT00000058036;ENSRNOT00000078014;ENSRNOT00000077670	GO:0005515(protein binding);GO:0005737(cytoplasm);GO:0005886(plasma membrane);GO:0005887(integral component of plasma membrane);GO:0008028(monocarboxylic acid transmembrane transporter activity);GO:0015129(lactate transmembrane transporter activity);GO:0015293(symporter activity);GO:0035873(lactate transmembrane transport);GO:0035879(plasma membrane lactate transport);GO:0050833(pyruvate transmem…	05230(Central carbon metabolism in cancer);05230(Central carbon metabolism in cancer)	K08180	NA	monocarboxylate transporter 2 [Rattus norvegicus]	1.04545	0.95808	3.05244	1.95525	0.40009	-1.3216	0.0230134	0.48036	down	yes
ENSRNOG00000006418	Samhd1	ENSRNOT00000008961;ENSRNOT00000067748	GO:0003676(nucleic acid binding);GO:0003723(RNA binding);GO:0005634(nucleus);GO:0005654(nucleoplasm);GO:0005886(plasma membrane);GO:0006203(dGTP catabolic process);GO:0008270(zinc ion binding);GO:0008832(dGTPase activity);GO:0032567(dGTP binding);GO:0045088(regulation of innate immune response);GO:0046061(dATP catabolic process);GO:0051289(protein homotetramerization);GO:0051607(defense response …	03040(Spliceosome);03040(Spliceosome)	K12830	NA	deoxynucleoside triphosphate triphosphohydrolase SAMHD1 [Rattus norvegicus]	3.2925	2.78458	1.40971	1.4282	2.14139	1.09855	0.0238567	0.496235	up	yes
ENSRNOG00000002408	Rbm47	ENSRNOT00000003327	GO:0000166(nucleotide binding);GO:0002244(hematopoietic progenitor cell differentiation);GO:0003723(RNA binding);GO:0005634(nucleus);GO:0016554(cytidine to uridine editing);GO:0044822(poly(A) RNA binding)	03013(RNA transport);03015(mRNA surveillance pathway);03018(RNA degradation)	K13126	NA	RNA-binding protein 47 [Rattus norvegicus]	2.97148	3.68036	6.1273	7.53393	0.486914	-1.03826	0.0239881	0.498106	down	yes
ENSRNOG00000003214	AABR07029742.1	ENSRNOT00000004285	GO:0000139(Golgi membrane);GO:0005769(early endosome);GO:0005794(Golgi apparatus);GO:0015095(magnesium ion transmembrane transporter activity);GO:0015693(magnesium ion transport);GO:0016021(integral component of membrane);GO:0031901(early endosome membrane)	NA	NA	NA	hypothetical LOC303211, isoform CRA_a [Rattus norvegicus]	3.04006	2.64194	1.41859	0.756466	2.61234	1.38534	0.0241298	0.49932	up	yes
ENSRNOG00000029726	Gstm1	ENSRNOT00000047139	GO:0004364(glutathione transferase activity);GO:0005496(steroid binding);GO:0005576(extracellular region);GO:0005737(cytoplasm);GO:0006749(glutathione metabolic process);GO:0007608(sensory perception of smell);GO:0010038(response to metal ion);GO:0010226(response to lithium ion);GO:0010288(response to lead ion);GO:0016151(nickel cation binding);GO:0018916(nitrobenzene metabolic process);GO:001989…	00480(Glutathione metabolism);00980(Metabolism of xenobiotics by cytochrome P450);00982(Drug metabolism - cytochrome P450);05204(Chemical carcinogenesis)	K00799	EC:2.5.1.18	rCG29047, isoform CRA_b [Rattus norvegicus]	317.375	450.042	825.543	741.187	0.489821	-1.02967	0.0243077	0.502136	down	yes
ENSRNOG00000059406	Ier5	ENSRNOT00000093366;ENSRNOT00000077157	GO:0005575(cellular_component);GO:0008150(biological_process);GO:0042802(identical protein binding);GO:0042802(identical protein binding)	NA	NA	NA	Ier5 protein [Rattus norvegicus]	19.5311	10.2531	5.43356	9.36606	2.01249	1.00898	0.0244667	0.502724	up	yes
ENSRNOG00000048800	AABR07031756.2	ENSRNOT00000019409	GO:0000978(RNA polymerase II core promoter proximal region sequence-specific DNA binding);GO:0001012(RNA polymerase II regulatory region DNA binding);GO:0001077(transcriptional activator activity, RNA polymerase II core promoter proximal region sequence-specific binding);GO:0003677(DNA binding);GO:0003682(chromatin binding);GO:0003690(double-stranded DNA binding);GO:0003700(transcription factor a…	04080(Neuroactive ligand-receptor interaction)	K05771	NA	glucocorticoid receptor [Rattus norvegicus]	0.357859	0.414731	1.12283	1.38786	0.30772	-1.70031	0.0245108	0.502724	down	yes
ENSRNOG00000008243	Slc43a1	ENSRNOT00000011006	GO:0005887(integral component of plasma membrane);GO:0015175(neutral amino acid transmembrane transporter activity);GO:0015179(L-amino acid transmembrane transporter activity);GO:0015804(neutral amino acid transport);GO:1902475(L-alpha-amino acid transmembrane transport)	NA	NA	NA	large neutral amino acids transporter small subunit 3 [Rattus norvegicus]	10.2798	9.92921	28.3995	13.4134	0.483321	-1.04895	0.0245456	0.502724	down	yes
ENSRNOG00000015664	Tmem8b	ENSRNOT00000021227	GO:0005886(plasma membrane);GO:0007160(cell-matrix adhesion);GO:0009986(cell surface);GO:0016021(integral component of membrane)	NA	NA	NA	PREDICTED: transmembrane protein 8B [Rattus norvegicus]	0.885947	2.06495	0.518845	0.377914	3.29063	1.71836	0.0247589	0.505464	up	yes
ENSRNOG00000040289	Xkr9	ENSRNOT00000081661;ENSRNOT00000062006	GO:0016020(membrane);GO:0016021(integral component of membrane);GO:0016021(integral component of membrane)	NA	NA	NA	XK-related protein 9 [Rattus norvegicus]	2.43934	2.25565	3.62103	6.48053	0.464779	-1.10538	0.0247636	0.505464	down	yes
ENSRNOG00000012886	Maff	ENSRNOT00000017181	GO:0001228(transcriptional activator activity, RNA polymerase II transcription regulatory region sequence-specific binding);GO:0001701(in utero embryonic development);GO:0005634(nucleus);GO:0005739(mitochondrion);GO:0006357(regulation of transcription from RNA polymerase II promoter);GO:0006366(transcription from RNA polymerase II promoter);GO:0035914(skeletal muscle cell differentiation);GO:0043…	04930(Type II diabetes mellitus);04950(Maturity onset diabetes of the young)	K07595	NA	PREDICTED: transcription factor MafF isoform X1 [Rattus norvegicus]	0.597388	0.507584	1.30556	1.8887	0.345924	-1.53147	0.0250308	0.510051	down	yes
ENSRNOG00000010204	Tmem9	ENSRNOT00000013738;ENSRNOT00000086004	GO:0005764(lysosome);GO:0005770(late endosome);GO:0016021(integral component of membrane);GO:0016021(integral component of membrane)	NA	NA	NA	PREDICTED: transmembrane protein 9 isoform X2 [Nomascus leucogenys]	4.15034	4.20895	10.6321	7.0048	0.473965	-1.07715	0.0251402	0.510615	down	yes
ENSRNOG00000000787	AABR07044364.1	ENSRNOT00000078110;ENSRNOT00000061299	GO:0002474(antigen processing and presentation of peptide antigen via MHC class I);GO:0005102(receptor binding);GO:0005886(plasma membrane);GO:0006955(immune response);GO:0042605(peptide antigen binding);GO:0042612(MHC class I protein complex);GO:0042612(MHC class I protein complex)	04514(Cell adhesion molecules (CAMs));04144(Endocytosis);04145(Phagosome);04650(Natural killer cell mediated cytotoxicity);04612(Antigen processing and presentation);05203(Viral carcinogenesis);05320(Autoimmune thyroid disease);05330(Allograft rejection);05332(Graft-versus-host disease);05416(Viral myocarditis);04940(Type I diabetes mellitus);05166(HTLV-I infection);05168(Herpes simplex infection…	K06751	NA	RT1 class I, T24, gene 4 [Rattus norvegicus]	5.60665	1.47167	0.765174	1.31804	3.39778	1.76459	0.0251565	0.510615	up	yes
ENSRNOG00000007632	Mss51	ENSRNOT00000010178	GO:0035176(social behavior);GO:0046872(metal ion binding)	NA	NA	NA	putative protein MSS51 homolog, mitochondrial [Rattus norvegicus]	4.25222	7.84278	2.39723	3.12143	2.19166	1.13202	0.0253279	0.511998	up	yes
ENSRNOG00000017767	Mrvi1	ENSRNOT00000024060	GO:0016021(integral component of membrane);GO:0019934(cGMP-mediated signaling);GO:0045986(negative regulation of smooth muscle contraction);GO:0060087(relaxation of vascular smooth muscle)	04022(cGMP - PKG signaling pathway);04270(Vascular smooth muscle contraction)	K12337	NA	protein MRVI1 isoform a [Rattus norvegicus]	1.44368	2.38997	1.98371	7.96814	0.385219	-1.37625	0.0253397	0.511998	down	yes
ENSRNOG00000009347	Arhgap25	ENSRNOT00000012645	GO:0005096(GTPase activator activity);GO:0007165(signal transduction);GO:0043547(positive regulation of GTPase activity)	04144(Endocytosis)	K12490	NA	Rho GTPase activating protein 25, isoform CRA_a, partial [Mus musculus]	5.42882	2.58055	1.80379	1.89856	2.16332	1.11325	0.0255328	0.515034	up	yes
ENSRNOG00000015242	Fbxl8	ENSRNOT00000020440	GO:0004842(ubiquitin-protein transferase activity)	NA	NA	NA	F-box/LRR-repeat protein 8 [Rattus norvegicus]	1.78567	1.48608	0.563199	0.626641	2.74973	1.45929	0.025817	0.517619	up	yes
ENSRNOG00000034290	Ccl21	ENSRNOT00000023951	GO:0001768(establishment of T cell polarity);GO:0001954(positive regulation of cell-matrix adhesion);GO:0002407(dendritic cell chemotaxis);GO:0002548(monocyte chemotaxis);GO:0005615(extracellular space);GO:0005622(intracellular);GO:0006954(inflammatory response);GO:0007186(G-protein coupled receptor signaling pathway);GO:0008009(chemokine activity);GO:0030593(neutrophil chemotaxis);GO:0030838(pos…	04064(NF-kappa B signaling pathway);04060(Cytokine-cytokine receptor interaction);04062(Chemokine signaling pathway)	K16062	NA	C-C motif chemokine 21 precursor [Rattus norvegicus]	6.16801	0.788704	19.3762	5.31549	0.281744	-1.82754	0.02587	0.517619	down	yes
ENSRNOG00000061639	AABR07044404.1	ENSRNOT00000061297;ENSRNOT00000091344	GO:0002474(antigen processing and presentation of peptide antigen via MHC class I);GO:0006955(immune response);GO:0016021(integral component of membrane);GO:0042605(peptide antigen binding);GO:0042612(MHC class I protein complex);GO:0005102(receptor binding);GO:0005886(plasma membrane);GO:0005886(plasma membrane)	04514(Cell adhesion molecules (CAMs));04144(Endocytosis);04145(Phagosome);04650(Natural killer cell mediated cytotoxicity);04612(Antigen processing and presentation);05203(Viral carcinogenesis);05320(Autoimmune thyroid disease);05330(Allograft rejection);05332(Graft-versus-host disease);05416(Viral myocarditis);04940(Type I diabetes mellitus);05166(HTLV-I infection);05168(Herpes simplex infection…	K06751	NA	RT1 class I, locus CE12 precursor [Rattus norvegicus]	9.87446	0.849557	1.21182	1.83276	3.52233	1.81653	0.0258767	0.517619	up	yes
ENSRNOG00000046313	Basp1	ENSRNOT00000073915	NA	NA	NA	NA		1.53865	1.05945	0.50793	0.256591	3.39834	1.76483	0.0259597	0.518064	up	yes
ENSRNOG00000029668	Wfdc21	ENSRNOT00000088737;ENSRNOT00000042643	GO:0005576(extracellular region);GO:0005615(extracellular space);GO:0010466(negative regulation of peptidase activity);GO:0030414(peptidase inhibitor activity);GO:0032496(response to lipopolysaccharide);GO:0034612(response to tumor necrosis factor);GO:0043085(positive regulation of catalytic activity);GO:0050872(white fat cell differentiation);GO:0050872(white fat cell differentiation)	NA	NA	NA	WDNM1-like protein [Rattus norvegicus]	451.729	174.835	98.1327	189.283	2.17999	1.12432	0.0262391	0.522258	up	yes
ENSRNOG00000007175	Mier1	ENSRNOT00000066041;ENSRNOT00000086765	GO:0003677(DNA binding);GO:0004871(signal transducer activity);GO:0005634(nucleus);GO:0005654(nucleoplasm);GO:0007165(signal transduction);GO:0017053(transcriptional repressor complex);GO:0031937(positive regulation of chromatin silencing);GO:0043123(positive regulation of I-kappaB kinase/NF-kappaB signaling);GO:0043123(positive regulation of I-kappaB kinase/NF-kappaB signaling)	NA	NA	NA	mesoderm induction early response protein 1 [Rattus norvegicus]	1.6213	2.9841	0.939313	1.22747	2.12545	1.08777	0.0266314	0.527724	up	yes
ENSRNOG00000021062	Fxyd5	ENSRNOT00000089474;ENSRNOT00000028597	GO:0003779(actin binding);GO:0005216(ion channel activity);GO:0005887(integral component of plasma membrane);GO:0016021(integral component of membrane);GO:0017080(sodium channel regulator activity);GO:0034220(ion transmembrane transport);GO:0045296(cadherin binding);GO:2000649(regulation of sodium ion transmembrane transporter activity);GO:2000649(regulation of sodium ion transmembrane transporte…	NA	NA	NA	FXYD domain-containing ion transport regulator 5 precursor [Rattus norvegicus]	23.931	5.60361	6.09911	5.2241	2.60832	1.38312	0.0266806	0.527724	up	yes
ENSRNOG00000009322	Ccdc126	ENSRNOT00000012490	GO:0006487(protein N-linked glycosylation);GO:0016020(membrane);GO:0030144(alpha-1,6-mannosylglycoprotein 6-beta-N-acetylglucosaminyltransferase activity)	00510(N-Glycan biosynthesis)	K00744	EC:2.4.1.155	coiled-coil domain-containing protein 126 [Rattus norvegicus]	1.71485	1.76263	4.02692	3.58191	0.457032	-1.12963	0.0266896	0.527724	down	yes
ENSRNOG00000014490	Bdh2	ENSRNOT00000019507	GO:0003858(3-hydroxybutyrate dehydrogenase activity);GO:0005737(cytoplasm);GO:0005739(mitochondrion);GO:0006635(fatty acid beta-oxidation);GO:0016628(oxidoreductase activity, acting on the CH-CH group of donors, NAD or NADP as acceptor);GO:0019290(siderophore biosynthetic process);GO:0030855(epithelial cell differentiation);GO:0042168(heme metabolic process);GO:0051287(NAD binding);GO:0055072(iro…	00650(Butanoate metabolism);00072(Synthesis and degradation of ketone bodies)	K00019	EC:1.1.1.30	3-hydroxybutyrate dehydrogenase type 2 [Rattus norvegicus]	3.70502	6.29898	9.88212	12.2317	0.452387	-1.14437	0.026819	0.527799	down	yes
ENSRNOG00000052880	Prph	ENSRNOT00000089211	GO:0001750(photoreceptor outer segment);GO:0005198(structural molecule activity);GO:0005515(protein binding);GO:0005882(intermediate filament);GO:0005883(neurofilament);GO:0016020(membrane);GO:0030424(axon);GO:0042622(photoreceptor outer segment membrane);GO:0043025(neuronal cell body);GO:0044299(C-fiber);GO:0045098(type III intermediate filament);GO:0045104(intermediate filament cytoskeleton org…	05014(Amyotrophic lateral sclerosis (ALS))	K07607	NA	peripherin [Rattus norvegicus]	0.718898	4.93666	0.413404	1.14487	3.62937	1.85972	0.0268253	0.527799	up	yes
ENSRNOG00000058039	Acta2	ENSRNOT00000083468	GO:0005737(cytoplasm);GO:0010628(positive regulation of gene expression);GO:0030027(lamellipodium);GO:0030175(filopodium);GO:0044297(cell body);GO:0090131(mesenchyme migration)	04270(Vascular smooth muscle contraction)	K12313	NA	actin, aortic smooth muscle-like isoform 1 [Cricetulus griseus]	3.33437	1.98742	8.45959	4.18423	0.420901	-1.24845	0.026879	0.527989	down	yes
ENSRNOG00000061638	AC121740.1	ENSRNOT00000087745	NA	NA	NA	NA		4.92244	7.75989	1.88668	2.70065	2.76465	1.46709	0.0269276	0.528081	up	yes
ENSRNOG00000017445	Tubb2b	ENSRNOT00000023582;ENSRNOT00000083705	GO:0001764(neuron migration);GO:0003924(GTPase activity);GO:0005200(structural constituent of cytoskeleton);GO:0005525(GTP binding);GO:0005634(nucleus);GO:0005737(cytoplasm);GO:0005874(microtubule);GO:0007017(microtubule-based process);GO:0007017(microtubule-based process)	04145(Phagosome);04540(Gap junction);05130(Pathogenic Escherichia coli infection);05130(Pathogenic Escherichia coli infection)	K07375	NA	tubulin beta-2B chain [Mus musculus]	0.236663	0.0653344	0.542318	0.571332	0.271178	-1.88269	0.027013	0.528181	down	yes
ENSRNOG00000008586	Aldh1l2	ENSRNOT00000059639	GO:0004029(aldehyde dehydrogenase (NAD) activity);GO:0005739(mitochondrion);GO:0006730(one-carbon metabolic process);GO:0009058(biosynthetic process);GO:0009258(10-formyltetrahydrofolate catabolic process);GO:0016021(integral component of membrane);GO:0016155(formyltetrahydrofolate dehydrogenase activity);GO:0016742(hydroxymethyl-, formyl- and related transferase activity);GO:0019145(aminobutyral…	00670(One carbon pool by folate)	K00289	EC:1.5.1.6	probable 10-formyltetrahydrofolate dehydrogenase ALDH1L2 [Rattus norvegicus]	12.1685	5.05116	19.6084	15.3719	0.492267	-1.02249	0.0270208	0.528181	down	yes
ENSRNOG00000052444	Samd9	ENSRNOT00000084021	GO:0005737(cytoplasm);GO:0043231(intracellular membrane-bounded organelle)	NA	NA	NA	PREDICTED: sterile alpha motif domain-containing protein 9 [Rattus norvegicus]	3.76611	0.716646	0.609259	0.972664	2.83374	1.50271	0.0272399	0.531599	up	yes
ENSRNOG00000008759	Csf3r	ENSRNOT00000011694	GO:0003674(molecular_function);GO:0004896(cytokine receptor activity);GO:0005575(cellular_component);GO:0016021(integral component of membrane);GO:0019221(cytokine-mediated signaling pathway);GO:0030593(neutrophil chemotaxis);GO:0045637(regulation of myeloid cell differentiation);GO:0051916(granulocyte colony-stimulating factor binding);GO:0097186(amelogenesis)	04630(Jak-STAT signaling pathway);04151(PI3K-Akt signaling pathway);04060(Cytokine-cytokine receptor interaction);04640(Hematopoietic cell lineage);05200(Pathways in cancer)	K05061	NA	granulocyte colony-stimulating factor receptor precursor [Rattus norvegicus]	1.50394	0.996421	0.497653	0.543746	2.40096	1.26361	0.027402	0.533895	up	yes
ENSRNOG00000008816	Gpnmb	ENSRNOT00000011945	GO:0001649(osteoblast differentiation);GO:0005178(integrin binding);GO:0005887(integral component of plasma membrane);GO:0007155(cell adhesion);GO:0008201(heparin binding);GO:0016023(cytoplasmic, membrane-bounded vesicle);GO:0030282(bone mineralization);GO:0032720(negative regulation of tumor necrosis factor production);GO:0042470(melanosome)	04145(Phagosome);04540(Gap junction)	K07374	NA	RecName: Full=Transmembrane glycoprotein NMB; Flags: Precursor	4.05468	0.981075	0.894147	0.815706	2.94514	1.55834	0.0276434	0.537725	up	yes
ENSRNOG00000020284	Prkar2a	ENSRNOT00000088705;ENSRNOT00000027552	GO:0004862(cAMP-dependent protein kinase inhibitor activity);GO:0005515(protein binding);GO:0005737(cytoplasm);GO:0005813(centrosome);GO:0005886(plasma membrane);GO:0005925(focal adhesion);GO:0005952(cAMP-dependent protein kinase complex);GO:0008603(cAMP-dependent protein kinase regulator activity);GO:0016020(membrane);GO:0016301(kinase activity);GO:0016310(phosphorylation);GO:0019904(protein dom…	04910(Insulin signaling pathway);04910(Insulin signaling pathway)	K04739	NA	protein kinase, cAMP-dependent, regulatory, type 2, alpha, isoform CRA_a [Rattus norvegicus]	0.671528	0.754847	1.05908	2.99351	0.351967	-1.50649	0.0277819	0.538943	down	yes
ENSRNOG00000048701	LOC682793	ENSRNOT00000044141	GO:0001501(skeletal system development);GO:0001503(ossification);GO:0003723(RNA binding);GO:0003735(structural constituent of ribosome);GO:0005925(focal adhesion);GO:0006412(translation);GO:0006417(regulation of translation);GO:0007605(sensory perception of sound);GO:0022618(ribonucleoprotein complex assembly);GO:0022625(cytosolic large ribosomal subunit);GO:0033291(eukaryotic 80S initiation comp…	03010(Ribosome)	K02923	NA	60S ribosomal protein L38, partial [Scophthalmus maximus]	16.2589	9.76694	21.1203	42.2687	0.410573	-1.28429	0.0280673	0.543329	down	yes
ENSRNOG00000021412	Slfn13	ENSRNOT00000055963;ENSRNOT00000076477;ENSRNOT00000076618	GO:0000049(tRNA binding);GO:0005524(ATP binding);GO:0005622(intracellular);GO:0005634(nucleus);GO:0051607(defense response to virus);GO:2000134(negative regulation of G1/S transition of mitotic cell cycle);GO:2000134(negative regulation of G1/S transition of mitotic cell cycle)	NA	NA	NA	PREDICTED: schlafen family member 11 isoform X1 [Rattus norvegicus]	14.5217	6.43628	3.80707	6.45404	2.04246	1.03031	0.0281576	0.5442	up	yes
ENSRNOG00000033057	AABR07025010.1	ENSRNOT00000047750	GO:0004365(glyceraldehyde-3-phosphate dehydrogenase (NAD+) (phosphorylating) activity);GO:0006006(glucose metabolic process);GO:0006096(glycolytic process);GO:0050661(NADP binding);GO:0051287(NAD binding);GO:0055114(oxidation-reduction process)	01200(Carbon metabolism);01230(Biosynthesis of amino acids);00010(Glycolysis / Gluconeogenesis);04066(HIF-1 signaling pathway);05010(Alzheimer's disease)	K00134	EC:1.2.1.12	PREDICTED: glyceraldehyde-3-phosphate dehydrogenase [Rattus norvegicus]	28.3624	5.58604	39.4524	42.6291	0.413595	-1.27371	0.02849	0.549738	down	yes
ENSRNOG00000011451	Lrp3	ENSRNOT00000015384	GO:0003674(molecular_function);GO:0005575(cellular_component);GO:0005905(clathrin-coated pit);GO:0006897(endocytosis);GO:0008150(biological_process);GO:0016021(integral component of membrane)	04977(Vitamin digestion and absorption)	K14616	NA	low-density lipoprotein receptor-related protein 3 precursor [Rattus norvegicus]	20.5268	25.2164	33.2069	58.8043	0.497148	-1.00825	0.0285598	0.5502	down	yes
ENSRNOG00000031997	Ttll7	ENSRNOT00000075452;ENSRNOT00000055318	GO:0006464(cellular protein modification process);GO:0018095(protein polyglutamylation);GO:0043014(alpha-tubulin binding);GO:0048487(beta-tubulin binding);GO:0070740(tubulin-glutamic acid ligase activity);GO:0070740(tubulin-glutamic acid ligase activity)	NA	NA	NA	PREDICTED: tubulin polyglutamylase TTLL7 isoform X2 [Rattus norvegicus]	0.418796	0.566696	0.115828	0.191623	3.20536	1.68049	0.0286767	0.550825	up	yes
ENSRNOG00000052651	LOC102556085	ENSRNOT00000083380	GO:0001895(retina homeostasis);GO:0005337(nucleoside transmembrane transporter activity);GO:0005415(nucleoside:sodium symporter activity);GO:0005887(integral component of plasma membrane);GO:0015211(purine nucleoside transmembrane transporter activity);GO:0015860(purine nucleoside transmembrane transport);GO:0034394(protein localization to cell surface);GO:1901642(nucleoside transmembrane transpo…	NA	NA	NA	PREDICTED: sodium/nucleoside cotransporter 2-like [Rattus norvegicus]	4.63311	6.25557	1.92419	2.28608	2.58622	1.37084	0.028714	0.550825	up	yes
ENSRNOG00000057078	Ddit4	ENSRNOT00000085026	GO:0001666(response to hypoxia);GO:0001764(neuron migration);GO:0005622(intracellular);GO:0005737(cytoplasm);GO:0005739(mitochondrion);GO:0006915(apoptotic process);GO:0007420(brain development);GO:0008283(cell proliferation);GO:0009968(negative regulation of signal transduction);GO:0010801(negative regulation of peptidyl-threonine phosphorylation);GO:0030182(neuron differentiation);GO:0032007(ne…	04151(PI3K-Akt signaling pathway);04150(mTOR signaling pathway);05206(MicroRNAs in cancer)	K08270	NA	DNA damage-inducible transcript 4 protein-like protein [Camelus ferus]	1.12628	1.38028	2.28426	4.08764	0.393378	-1.34601	0.0287299	0.550825	down	yes
ENSRNOG00000015124	Gpam	ENSRNOT00000083215;ENSRNOT00000092170;ENSRNOT00000047903	GO:0004366(glycerol-3-phosphate O-acyltransferase activity);GO:0005739(mitochondrion);GO:0005741(mitochondrial outer membrane);GO:0005743(mitochondrial inner membrane);GO:0005886(plasma membrane);GO:0006631(fatty acid metabolic process);GO:0006637(acyl-CoA metabolic process);GO:0006641(triglyceride metabolic process);GO:0006650(glycerophospholipid metabolic process);GO:0008654(phospholipid biosyn…	00561(Glycerolipid metabolism);00564(Glycerophospholipid metabolism);00564(Glycerophospholipid metabolism)	K00629	EC:2.3.1.15	PREDICTED: glycerol-3-phosphate acyltransferase 1, mitochondrial isoform X1 [Rattus norvegicus]	6.53828	14.8366	6.15879	4.13381	2.07672	1.05431	0.0288025	0.55112	up	yes
ENSRNOG00000005695	Mgp	ENSRNOT00000007577	GO:0001503(ossification);GO:0005201(extracellular matrix structural constituent);GO:0005509(calcium ion binding);GO:0005615(extracellular space);GO:0005783(endoplasmic reticulum);GO:0006461(protein complex assembly);GO:0007584(response to nutrient);GO:0009612(response to mechanical stimulus);GO:0009725(response to hormone);GO:0010033(response to organic substance);GO:0030154(cell differentiation)…	NA	NA	NA	Mgp protein [Rattus norvegicus]	24.9925	16.5785	55.2164	28.574	0.496131	-1.01121	0.0289156	0.55174	down	yes
ENSRNOG00000026044	Prrg1	ENSRNOT00000066663	GO:0005509(calcium ion binding);GO:0005576(extracellular region);GO:0016021(integral component of membrane)	04610(Complement and coagulation cascades)	K01314	EC:3.4.21.6	transmembrane gamma-carboxyglutamic acid protein 1 [Rattus norvegicus]	0.306585	0.36087	0.959098	0.835366	0.371952	-1.42681	0.029145	0.554399	down	yes
ENSRNOG00000048053	AC128859.3	ENSRNOT00000075851;ENSRNOT00000072207	GO:0003674(molecular_function);GO:0005575(cellular_component);GO:0008150(biological_process);GO:0008150(biological_process)	NA	NA	NA	PREDICTED: schlafen family member 12 [Rattus norvegicus]	9.3102	1.07975	1.18652	1.79016	3.49046	1.80342	0.0291473	0.554399	up	yes
ENSRNOG00000027593	Ndufv3	ENSRNOT00000030926	GO:0005747(mitochondrial respiratory chain complex I);GO:0055114(oxidation-reduction process)	00190(Oxidative phosphorylation);05010(Alzheimer's disease);05012(Parkinson's disease);05016(Huntington's disease);04932(Non-alcoholic fatty liver disease (NAFLD))	K03944	NA	NADH dehydrogenase [ubiquinone] flavoprotein 3, mitochondrial isoform 2 [Rattus norvegicus]	1.31304	1.09277	3.17641	4.62952	0.308203	-1.69805	0.0293701	0.557752	down	yes
ENSRNOG00000057470	Pla2g12a	ENSRNOT00000087287;ENSRNOT00000080183	GO:0004623(phospholipase A2 activity);GO:0005509(calcium ion binding);GO:0005576(extracellular region);GO:0005622(intracellular);GO:0005783(endoplasmic reticulum);GO:0005794(Golgi apparatus);GO:0016042(lipid catabolic process);GO:0016042(lipid catabolic process)	00564(Glycerophospholipid metabolism);00566(Ether lipid metabolism);00590(Arachidonic acid metabolism);00591(Linoleic acid metabolism);00592(alpha-Linolenic acid metabolism);04014(Ras signaling pathway);04270(Vascular smooth muscle contraction);04972(Pancreatic secretion);04975(Fat digestion and absorption);04975(Fat digestion and absorption)	K01047	EC:3.1.1.4	PREDICTED: group XIIA secretory phospholipase A2 isoform X1 [Rattus norvegicus]	8.76563	2.5823	12.1555	13.4151	0.443787	-1.17206	0.0294868	0.558916	down	yes
ENSRNOG00000026848	Tex36	ENSRNOT00000037064;ENSRNOT00000086703	NA	NA	NA	NA	testis-expressed sequence 36 protein [Rattus norvegicus]	5.96451	2.17678	1.87085	0.916196	2.92112	1.54652	0.0295245	0.558916	up	yes
ENSRNOG00000023803	Cmya5	ENSRNOT00000073710	GO:0014733(regulation of skeletal muscle adaptation);GO:0032513(negative regulation of protein phosphatase type 2B activity);GO:0042802(identical protein binding);GO:0043034(costamere);GO:0070885(negative regulation of calcineurin-NFAT signaling cascade)	NA	NA	NA	PREDICTED: cardiomyopathy-associated protein 5 [Rattus norvegicus]	0.894276	2.06176	0.61881	0.794861	2.09104	1.06422	0.0296855	0.559449	up	yes
ENSRNOG00000038319	Akr1c19	ENSRNOT00000058351	GO:0016491(oxidoreductase activity);GO:0055114(oxidation-reduction process)	00140(Steroid hormone biosynthesis);00590(Arachidonic acid metabolism);04913(Ovarian Steroidogenesis)	K04119	EC:1.1.1.51;EC:1.1.1.188	aldo-keto reductase family 1, member C19 [Rattus norvegicus]	22.5059	12.8751	5.05731	12.12	2.05975	1.04247	0.029707	0.559449	up	yes
ENSRNOG00000003209	Pcp4l1	ENSRNOT00000004347;ENSRNOT00000078402	GO:0003674(molecular_function);GO:0005575(cellular_component);GO:0008150(biological_process);GO:0008150(biological_process)	NA	NA	NA	Purkinje cell protein 4-like protein 1 [Rattus norvegicus]	0.43311	0.374271	1.32554	1.05425	0.339265	-1.55952	0.0297391	0.559449	down	yes
ENSRNOG00000032364	Tbcel	ENSRNOT00000059951	GO:0005737(cytoplasm);GO:0005856(cytoskeleton)	NA	NA	NA	PREDICTED: tubulin-specific chaperone cofactor E-like protein isoform X1 [Rattus norvegicus]	0.362759	0.257585	0.725143	1.20873	0.320778	-1.64035	0.030172	0.565819	down	yes
ENSRNOG00000023614	Hsh2d	ENSRNOT00000038494	GO:0002903(negative regulation of B cell apoptotic process);GO:0005070(SH3/SH2 adaptor activity);GO:0005739(mitochondrion);GO:0005829(cytosol);GO:0009967(positive regulation of signal transduction);GO:0042110(T cell activation);GO:0051902(negative regulation of mitochondrial depolarization)	04370(VEGF signaling pathway)	K08273	NA	hematopoietic SH2 domain-containing protein [Rattus norvegicus]	4.36609	0.894144	0.598949	1.13975	3.02539	1.59712	0.0304255	0.568303	up	yes
ENSRNOG00000061403	Tlr13	ENSRNOT00000077639	GO:0007165(signal transduction)	04145(Phagosome);04620(Toll-like receptor signaling pathway);05168(Herpes simplex infection)	K10159	NA	PREDICTED: LOW QUALITY PROTEIN: toll-like receptor 13 isoform X1 [Rattus norvegicus]	1.84308	0.851571	0.496204	0.589544	2.48184	1.31141	0.0304736	0.568303	up	yes
ENSRNOG00000007752	Zmynd19	ENSRNOT00000010270	GO:0005515(protein binding);GO:0005737(cytoplasm);GO:0005886(plasma membrane);GO:0045202(synapse);GO:0046872(metal ion binding)	NA	NA	NA	PREDICTED: zinc finger MYND domain-containing protein 19 [Microcebus murinus]	5.66743	4.21894	1.69068	2.61844	2.29429	1.19805	0.0305209	0.568303	up	yes
ENSRNOG00000017878	Aldh1a7	ENSRNOT00000024093	GO:0004028(3-chloroallyl aldehyde dehydrogenase activity);GO:0004029(aldehyde dehydrogenase (NAD) activity);GO:0005829(cytosol);GO:0006068(ethanol catabolic process);GO:0016620(oxidoreductase activity, acting on the aldehyde or oxo group of donors, NAD or NADP as acceptor);GO:0018479(benzaldehyde dehydrogenase (NAD+) activity);GO:0035106(operant conditioning);GO:0042802(identical protein binding)…	00830(Retinol metabolism)	K07249	EC:1.2.1.36	PREDICTED: LOW QUALITY PROTEIN: aldehyde dehydrogenase, cytosolic 1 isoform X2 [Rattus norvegicus]	9.72236	19.6965	8.56589	1.26107	2.99368	1.58192	0.0306505	0.569454	up	yes
ENSRNOG00000033581	AABR07044388.2	ENSRNOT00000079084;ENSRNOT00000086152;ENSRNOT00000088392;ENSRNOT00000086791;ENSRNOT00000077635;ENSRNOT00000078243;ENSRNOT00000048985;ENSRNOT00000082951	GO:0005578(proteinaceous extracellular matrix);GO:0030199(collagen fibril organization);GO:0031012(extracellular matrix);GO:0031012(extracellular matrix)	04151(PI3K-Akt signaling pathway);04512(ECM-receptor interaction);04510(Focal adhesion);05206(MicroRNAs in cancer);05206(MicroRNAs in cancer)	K06252	NA	Tnxb protein, partial [Rattus norvegicus]	0.435273	0.826258	2.10524	0.892024	0.420894	-1.24847	0.0307258	0.569521	down	yes
ENSRNOG00000016695	Mmp2	ENSRNOT00000022679	GO:0001525(angiogenesis);GO:0001541(ovarian follicle development);GO:0001542(ovulation from ovarian follicle);GO:0001553(luteinization);GO:0001666(response to hypoxia);GO:0001955(blood vessel maturation);GO:0001957(intramembranous ossification);GO:0001968(fibronectin binding);GO:0004222(metalloendopeptidase activity);GO:0004252(serine-type endopeptidase activity);GO:0005578(proteinaceous extracel…	04670(Leukocyte transendothelial migration);04912(GnRH signaling pathway);04915(Estrogen signaling pathway);05200(Pathways in cancer);05205(Proteoglycans in cancer);05219(Bladder cancer);04933(AGE-RAGE signaling pathway in diabetic complications)	K01398	EC:3.4.24.24	72 kDa type IV collagenase precursor [Rattus norvegicus]	2.09384	1.79196	5.77112	2.68219	0.459678	-1.12131	0.0309333	0.572052	down	yes
ENSRNOG00000033564	Cfd	ENSRNOT00000015029;ENSRNOT00000093132	GO:0004175(endopeptidase activity);GO:0004252(serine-type endopeptidase activity);GO:0005615(extracellular space);GO:0006508(proteolysis);GO:0006957(complement activation, alternative pathway);GO:0007219(Notch signaling pathway);GO:0070062(extracellular exosome);GO:0070062(extracellular exosome)	04610(Complement and coagulation cascades);05150(Staphylococcus aureus infection);05150(Staphylococcus aureus infection)	K01334	EC:3.4.21.46	complement factor D (adipsin), isoform CRA_b [Rattus norvegicus]	8.91949	15.289	21.963	26.4948	0.499578	-1.00122	0.0310321	0.572996	down	yes
ENSRNOG00000047314	Tk1	ENSRNOT00000071420	GO:0001889(liver development);GO:0003674(molecular_function);GO:0004797(thymidine kinase activity);GO:0005524(ATP binding);GO:0005737(cytoplasm);GO:0006259(DNA metabolic process);GO:0008270(zinc ion binding);GO:0009157(deoxyribonucleoside monophosphate biosynthetic process);GO:0009165(nucleotide biosynthetic process);GO:0009636(response to toxic substance);GO:0014856(skeletal muscle cell prolifer…	00240(Pyrimidine metabolism);00983(Drug metabolism - other enzymes)	K00857	EC:2.7.1.21	thymidine kinase, cytosolic [Rattus norvegicus]	6.1206	3.27409	1.94742	2.48434	2.11986	1.08397	0.0311844	0.574757	up	yes
ENSRNOG00000025608	Lrat	ENSRNOT00000082156;ENSRNOT00000035411	GO:0001972(retinoic acid binding);GO:0005771(multivesicular body);GO:0005789(endoplasmic reticulum membrane);GO:0005791(rough endoplasmic reticulum);GO:0006776(vitamin A metabolic process);GO:0007601(visual perception);GO:0008374(O-acyltransferase activity);GO:0016021(integral component of membrane);GO:0019841(retinol binding);GO:0032370(positive regulation of lipid transport);GO:0042572(retinol …	00830(Retinol metabolism);04977(Vitamin digestion and absorption);04977(Vitamin digestion and absorption)	K00678	EC:2.3.1.135	lecithin retinol acyltransferase [Rattus norvegicus]	0.903556	1.10369	2.2012	1.96353	0.481963	-1.05301	0.0322488	0.588485	down	yes
ENSRNOG00000032871	Mlc1	ENSRNOT00000055879	GO:0005216(ion channel activity);GO:0005737(cytoplasm);GO:0005764(lysosome);GO:0005768(endosome);GO:0005769(early endosome);GO:0005783(endoplasmic reticulum);GO:0005886(plasma membrane);GO:0005901(caveola);GO:0005911(cell-cell junction);GO:0008565(protein transporter activity);GO:0015031(protein transport);GO:0016021(integral component of membrane);GO:0016192(vesicle-mediated transport);GO:001632…	NA	NA	NA	membrane protein MLC1 [Rattus norvegicus]	10.6859	5.30261	2.63228	0.019944	6.02835	2.59176	0.0322619	0.588485	up	yes
ENSRNOG00000048190	Rgmb	ENSRNOT00000075401	GO:0005793(endoplasmic reticulum-Golgi intermediate compartment);GO:0005886(plasma membrane);GO:0007155(cell adhesion);GO:0007165(signal transduction);GO:0015026(coreceptor activity);GO:0030509(BMP signaling pathway);GO:0042802(identical protein binding);GO:0045893(positive regulation of transcription, DNA-templated);GO:0046658(anchored component of plasma membrane)	NA	NA	NA	PREDICTED: RGM domain family member B isoform X1 [Rattus norvegicus]	0.884409	1.00813	0.272571	0.33927	3.09318	1.62909	0.0328485	0.59449	up	yes
ENSRNOG00000008839	Pparg	ENSRNOT00000082969;ENSRNOT00000051858;ENSRNOT00000012137	GO:0000122(negative regulation of transcription from RNA polymerase II promoter);GO:0001012(RNA polymerase II regulatory region DNA binding);GO:0001046(core promoter sequence-specific DNA binding);GO:0001228(transcriptional activator activity, RNA polymerase II transcription regulatory region sequence-specific binding);GO:0001818(negative regulation of cytokine production);GO:0001890(placenta dev…	04152(AMPK signaling pathway);03320(PPAR signaling pathway);04380(Osteoclast differentiation);04211(Longevity regulating pathway - mammal);05200(Pathways in cancer);05202(Transcriptional misregulation in cancers);05216(Thyroid cancer);05016(Huntington's disease);05016(Huntington's disease)	K08530	NA	peroxisome proliferator-activated receptor gamma [Cricetulus griseus]	0.296188	0.166143	0.787245	0.613983	0.329947	-1.59969	0.0328905	0.59449	down	yes
ENSRNOG00000030228	LOC688932	ENSRNOT00000041740	GO:0000151(ubiquitin ligase complex);GO:0000166(nucleotide binding);GO:0000974(Prp19 complex);GO:0001664(G-protein coupled receptor binding);GO:0001786(phosphatidylserine binding);GO:0001916(positive regulation of T cell mediated cytotoxicity);GO:0001917(photoreceptor inner segment);GO:0003723(RNA binding);GO:0005102(receptor binding);GO:0005515(protein binding);GO:0005524(ATP binding);GO:0005615…	03040(Spliceosome);04141(Protein processing in endoplasmic reticulum);04010(MAPK signaling pathway);04144(Endocytosis);04612(Antigen processing and presentation);04915(Estrogen signaling pathway);04213(Longevity regulating pathway - multiple species);05134(Legionellosis);05162(Measles);05164(Influenza A);05169(Epstein-Barr virus infection);05145(Toxoplasmosis)	K03283	NA	heat shock cognate 71 kDa protein [Rattus norvegicus]	1.42008	1.4218	6.82611	1.33735	0.348122	-1.52233	0.0329391	0.59449	down	yes
ENSRNOG00000020035	Cyp17a1	ENSRNOT00000027160	GO:0004508(steroid 17-alpha-monooxygenase activity);GO:0005506(iron ion binding);GO:0005739(mitochondrion);GO:0005783(endoplasmic reticulum);GO:0006082(organic acid metabolic process);GO:0006694(steroid biosynthetic process);GO:0006702(androgen biosynthetic process);GO:0006704(glucocorticoid biosynthetic process);GO:0007548(sex differentiation);GO:0008202(steroid metabolic process);GO:0008584(mal…	00140(Steroid hormone biosynthesis);04913(Ovarian Steroidogenesis);04917(Prolactin signaling pathway)	K00512	EC:1.14.14.19;EC:4.1.2.30	PREDICTED: steroid 17-alpha-hydroxylase/17,20 lyase isoform X1 [Rattus norvegicus]	49.6556	10.2181	11.0086	13.8628	2.40733	1.26743	0.0331181	0.596821	up	yes
ENSRNOG00000025075	Relt	ENSRNOT00000038408;ENSRNOT00000077661	GO:0005031(tumor necrosis factor-activated receptor activity);GO:0005887(integral component of plasma membrane);GO:0006954(inflammatory response);GO:0006955(immune response);GO:0007275(multicellular organism development);GO:0032496(response to lipopolysaccharide);GO:0033209(tumor necrosis factor-mediated signaling pathway);GO:0042127(regulation of cell proliferation);GO:0042981(regulation of apop…	04060(Cytokine-cytokine receptor interaction);04060(Cytokine-cytokine receptor interaction)	K05156	NA	PREDICTED: tumor necrosis factor receptor superfamily member 19L isoform X1 [Rattus norvegicus]	2.30498	1.00489	0.590633	0.707914	2.5489	1.34987	0.0332729	0.598713	up	yes
ENSRNOG00000020202	Asrgl1	ENSRNOT00000027459	GO:0003948(N4-(beta-N-acetylglucosaminyl)-L-asparaginase activity);GO:0004067(asparaginase activity);GO:0005634(nucleus);GO:0005737(cytoplasm);GO:0006508(proteolysis);GO:0008798(beta-aspartyl-peptidase activity);GO:0033345(asparagine catabolic process via L-aspartate)	00511(Other glycan degradation);04142(Lysosome)	K01444	EC:3.5.1.26	isoaspartyl peptidase/L-asparaginase [Rattus norvegicus]	3.04857	3.45941	5.65125	7.86816	0.48138	-1.05475	0.0333653	0.598984	down	yes
ENSRNOG00000016173	Cyp1a2	ENSRNOT00000021653	GO:0004497(monooxygenase activity);GO:0005506(iron ion binding);GO:0005789(endoplasmic reticulum membrane);GO:0006706(steroid catabolic process);GO:0006725(cellular aromatic compound metabolic process);GO:0006778(porphyrin-containing compound metabolic process);GO:0006805(xenobiotic metabolic process);GO:0009403(toxin biosynthetic process);GO:0009404(toxin metabolic process);GO:0009791(post-embry…	00140(Steroid hormone biosynthesis);00591(Linoleic acid metabolism);00380(Tryptophan metabolism);00830(Retinol metabolism);00232(Caffeine metabolism);00980(Metabolism of xenobiotics by cytochrome P450);00982(Drug metabolism - cytochrome P450);05204(Chemical carcinogenesis)	K07409	EC:1.14.14.1	cytochrome P450 1A2 [Rattus norvegicus]	451.939	357.111	529.969	1093.6	0.498317	-1.00487	0.0335516	0.60039	down	yes
ENSRNOG00000029988	AABR07007675.1	ENSRNOT00000046772	GO:0003735(structural constituent of ribosome);GO:0005840(ribosome);GO:0006412(translation)	03010(Ribosome)	K02920	NA	hypothetical protein EGK_13368 [Macaca mulatta]	12.8125	3.05608	2.96709	1.50534	3.54808	1.82704	0.0336105	0.60039	up	yes
ENSRNOG00000002137	Aasdh	ENSRNOT00000002907	GO:0003824(catalytic activity);GO:0019482(beta-alanine metabolic process);GO:0043041(amino acid activation for nonribosomal peptide biosynthetic process)	NA	NA	NA	PREDICTED: acyl-CoA synthetase family member 4 isoform X1 [Rattus norvegicus]	3.00229	3.49094	1.81075	1.39622	2.02472	1.01772	0.0336811	0.600655	up	yes
ENSRNOG00000011913	Cp	ENSRNOT00000016083;ENSRNOT00000082627	GO:0001889(liver development);GO:0004322(ferroxidase activity);GO:0005507(copper ion binding);GO:0005615(extracellular space);GO:0005623(cell);GO:0005765(lysosomal membrane);GO:0006825(copper ion transport);GO:0006879(cellular iron ion homeostasis);GO:0007568(aging);GO:0007584(response to nutrient);GO:0015679(plasma membrane copper ion transport);GO:0030324(lung development);GO:0046658(anchored c…	00860(Porphyrin and chlorophyll metabolism);00860(Porphyrin and chlorophyll metabolism)	K13624	EC:1.16.3.1	ceruloplasmin isoform 2 precursor [Rattus norvegicus]	924.862	215.64	232.724	252.459	2.35066	1.23307	0.0340137	0.604262	up	yes
ENSRNOG00000005600	Nr4a2	ENSRNOT00000041394;ENSRNOT00000078001	GO:0000122(negative regulation of transcription from RNA polymerase II promoter);GO:0000979(RNA polymerase II core promoter sequence-specific DNA binding);GO:0001077(transcriptional activator activity, RNA polymerase II core promoter proximal region sequence-specific binding);GO:0001666(response to hypoxia);GO:0001764(neuron migration);GO:0001975(response to amphetamine);GO:0003677(DNA binding);G…	04925(Aldosterone synthesis and secretion);04925(Aldosterone synthesis and secretion)	K08558	NA	PREDICTED: nuclear receptor subfamily 4 group A member 2 isoform X2 [Macaca mulatta]	0.846786	0.750042	2.84754	1.08224	0.40634	-1.29924	0.0340367	0.604262	down	yes
ENSRNOG00000010208	Timp1	ENSRNOT00000013745	GO:0001775(cell activation);GO:0002020(protease binding);GO:0005125(cytokine activity);GO:0005578(proteinaceous extracellular matrix);GO:0005604(basement membrane);GO:0005615(extracellular space);GO:0006694(steroid biosynthetic process);GO:0007568(aging);GO:0008083(growth factor activity);GO:0008191(metalloendopeptidase inhibitor activity);GO:0008284(positive regulation of cell proliferation);GO:…	04066(HIF-1 signaling pathway)	K16451	NA	metalloproteinase inhibitor 1 precursor [Rattus norvegicus]	15.933	20.1005	5.81139	11.931	2.03093	1.02214	0.0340848	0.604262	up	yes
ENSRNOG00000055745	AABR07043748.2	ENSRNOT00000092177;ENSRNOT00000085034	GO:0000122(negative regulation of transcription from RNA polymerase II promoter);GO:0001085(RNA polymerase II transcription factor binding);GO:0001190(transcriptional activator activity, RNA polymerase II transcription factor binding);GO:0004842(ubiquitin-protein transferase activity);GO:0005634(nucleus);GO:0005737(cytoplasm);GO:0006366(transcription from RNA polymerase II promoter);GO:0016020(me…	04120(Ubiquitin mediated proteolysis);04120(Ubiquitin mediated proteolysis)	K05630	EC:2.3.2.26	NEDD4-like E3 ubiquitin-protein ligase WWP2 isoform 2 [Cricetulus griseus]	0.297427	0.571168	1.37804	1.66707	0.285243	-1.80974	0.0342154	0.605683	down	yes
ENSRNOG00000004621	Rtn4	ENSRNOT00000006443;ENSRNOT00000006957;ENSRNOT00000042965;ENSRNOT00000041638	GO:0005789(endoplasmic reticulum membrane);GO:0016021(integral component of membrane);GO:0001525(angiogenesis);GO:0005515(protein binding);GO:0005622(intracellular);GO:0005635(nuclear envelope);GO:0005737(cytoplasm);GO:0005783(endoplasmic reticulum);GO:0005886(plasma membrane);GO:0007399(nervous system development);GO:0007413(axonal fasciculation);GO:0007568(aging);GO:0010977(negative regulation …	04141(Protein processing in endoplasmic reticulum);04141(Protein processing in endoplasmic reticulum)	K08288	NA	PREDICTED: reticulon-4 isoform X4 [Rattus norvegicus]	0.739074	0.36988	0.893877	1.80944	0.41022	-1.28553	0.0347898	0.611343	down	yes
ENSRNOG00000014387	Chac1	ENSRNOT00000019392	GO:0003839(gamma-glutamylcyclotransferase activity);GO:0005112(Notch binding);GO:0005515(protein binding);GO:0005802(trans-Golgi network);GO:0005829(cytosol);GO:0006750(glutathione biosynthetic process);GO:0006986(response to unfolded protein);GO:0007219(Notch signaling pathway);GO:0010955(negative regulation of protein processing);GO:0022008(neurogenesis);GO:0045746(negative regulation of Notch …	00900(Terpenoid backbone biosynthesis)	K00021	EC:1.1.1.34	PREDICTED: LOW QUALITY PROTEIN: glutathione-specific gamma-glutamylcyclotransferase 1 [Felis catus]	5.5084	1.68477	23.7415	1.82998	0.281296	-1.82984	0.0350953	0.613863	down	yes
ENSRNOG00000014673	Eri2	ENSRNOT00000019747	GO:0000467(exonucleolytic trimming to generate mature 3'-end of 5.8S rRNA from tricistronic rRNA transcript (SSU-rRNA, 5.8S rRNA, LSU-rRNA));GO:0003676(nucleic acid binding);GO:0008270(zinc ion binding)	00650(Butanoate metabolism)	K01896	EC:6.2.1.2	ERI1 exoribonuclease 2 [Rattus norvegicus]	1.70391	2.60509	0.898002	1.11077	2.1451	1.10104	0.0351745	0.613863	up	yes
ENSRNOG00000017915	Dvl2	ENSRNOT00000024348	GO:0001843(neural tube closure);GO:0001934(positive regulation of protein phosphorylation);GO:0003007(heart morphogenesis);GO:0003151(outflow tract morphogenesis);GO:0003674(molecular_function);GO:0005109(frizzled binding);GO:0005575(cellular_component);GO:0005634(nucleus);GO:0005737(cytoplasm);GO:0005829(cytosol);GO:0005886(plasma membrane);GO:0006366(transcription from RNA polymerase II promote…	04310(Wnt signaling pathway);04330(Notch signaling pathway);04390(Hippo signaling pathway);04550(Signaling pathways regulating pluripotency of stem cells);04916(Melanogenesis);05200(Pathways in cancer);05217(Basal cell carcinoma);05166(HTLV-I infection)	K02353	NA	segment polarity protein dishevelled homolog DVL-2 [Rattus norvegicus]	5.02561	5.63703	20.0291	4.95222	0.426825	-1.22828	0.0352401	0.613863	down	yes
ENSRNOG00000022256	Cxcl10	ENSRNOT00000003075	GO:0002690(positive regulation of leukocyte chemotaxis);GO:0005125(cytokine activity);GO:0005576(extracellular region);GO:0005615(extracellular space);GO:0006935(chemotaxis);GO:0006954(inflammatory response);GO:0006955(immune response);GO:0007186(G-protein coupled receptor signaling pathway);GO:0008009(chemokine activity);GO:0008201(heparin binding);GO:0008284(positive regulation of cell prolifer…	04668(TNF signaling pathway);04060(Cytokine-cytokine receptor interaction);04620(Toll-like receptor signaling pathway);04622(RIG-I-like receptor signaling pathway);04623(Cytosolic DNA-sensing pathway);04062(Chemokine signaling pathway);05164(Influenza A)	K12671	NA	RecName: Full=C-X-C motif chemokine 10; AltName: Full=10 kDa interferon gamma-induced protein; Short=Gamma-IP10; Short=IP-10; AltName: Full=Interferon-inducible protein 10; AltName: Full=Protein Mob-1; AltName: Full=Small-inducible cytokine B10; Flags: Precursor	24.3754	3.42076	4.5063	5.32053	2.82861	1.50009	0.0354099	0.614506	up	yes
ENSRNOG00000009884	Lgals1	ENSRNOT00000013538	GO:0001948(glycoprotein binding);GO:0002317(plasma cell differentiation);GO:0004871(signal transducer activity);GO:0005578(proteinaceous extracellular matrix);GO:0005615(extracellular space);GO:0005622(intracellular);GO:0005634(nucleus);GO:0005737(cytoplasm);GO:0006915(apoptotic process);GO:0007165(signal transduction);GO:0009986(cell surface);GO:0010812(negative regulation of cell-substrate adhe…	NA	NA	NA	galectin-1 [Rattus norvegicus]	21.307	7.65017	7.06998	4.63627	2.47365	1.30664	0.0355673	0.614919	up	yes
ENSRNOG00000039674	AABR07034657.1	ENSRNOT00000012267	GO:0005634(nucleus);GO:0016925(protein sumoylation);GO:0019789(SUMO transferase activity);GO:0031386(protein tag);GO:0045944(positive regulation of transcription from RNA polymerase II promoter)	03013(RNA transport)	K12160	NA	PREDICTED: uncharacterized protein LOC102981553 [Physeter catodon]	5.17726	4.52506	2.16078	0.28367	3.96912	1.98882	0.035634	0.614919	up	yes
ENSRNOG00000027259	AABR07029661.1	ENSRNOT00000036481	GO:0005506(iron ion binding);GO:0006633(fatty acid biosynthetic process);GO:0016021(integral component of membrane);GO:0016491(oxidoreductase activity);GO:0055114(oxidation-reduction process)	00100(Steroid biosynthesis)	K07750	EC:1.14.13.72	PREDICTED: fatty acid hydroxylase domain-containing protein 2 [Rattus norvegicus]	5.26463	1.69865	1.10812	1.25483	2.94686	1.55918	0.0356819	0.614919	up	yes
ENSRNOG00000019885	Magi3	ENSRNOT00000026952;ENSRNOT00000088095	GO:0005109(frizzled binding);GO:0005515(protein binding);GO:0005524(ATP binding);GO:0005634(nucleus);GO:0005886(plasma membrane);GO:0005911(cell-cell junction);GO:0005923(bicellular tight junction);GO:0007165(signal transduction);GO:0032947(protein complex scaffold);GO:0043507(positive regulation of JUN kinase activity);GO:0046328(regulation of JNK cascade);GO:0046328(regulation of JNK cascade)	04015(Rap1 signaling pathway);04530(Tight junction);04530(Tight junction)	K06112	NA	membrane-associated guanylate kinase, WW and PDZ domain-containing protein 3 [Rattus norvegicus]	0.551652	0.950655	1.7331	1.53852	0.459194	-1.12282	0.0360875	0.618747	down	yes
ENSRNOG00000021084	AABR07006310.1	ENSRNOT00000028622	GO:0016021(integral component of membrane)	NA	NA	NA	Mpg-1 protein [Rattus norvegicus]	7.20046	3.76767	2.13315	3.19625	2.05804	1.04127	0.0362363	0.62041	up	yes
ENSRNOG00000058752	Popdc2	ENSRNOT00000087892	GO:0002027(regulation of heart rate);GO:0016020(membrane);GO:0016021(integral component of membrane);GO:0030552(cAMP binding);GO:0042383(sarcolemma);GO:0042391(regulation of membrane potential);GO:0060931(sinoatrial node cell development)	NA	NA	NA	popeye domain-containing protein 2 [Rattus norvegicus]	1.69651	2.53068	2.91556	6.91639	0.429945	-1.21778	0.0363251	0.621046	down	yes
ENSRNOG00000058908	Hmgb1	ENSRNOT00000081634	GO:0000400(four-way junction DNA binding);GO:0000405(bubble DNA binding);GO:0005125(cytokine activity);GO:0005634(nucleus);GO:0006954(inflammatory response);GO:0008301(DNA binding, bending);GO:0032392(DNA geometric change);GO:0097100(supercoiled DNA binding)	03410(Base excision repair)	K10802	NA	mCG144566, partial [Mus musculus]	2.62444	2.39251	3.84966	6.5437	0.482707	-1.05078	0.036482	0.622841	down	yes
ENSRNOG00000021735	Akr1cl	ENSRNOT00000058312	GO:0016491(oxidoreductase activity);GO:0055114(oxidation-reduction process)	00140(Steroid hormone biosynthesis);00590(Arachidonic acid metabolism);04913(Ovarian Steroidogenesis)	K04119	EC:1.1.1.51;EC:1.1.1.188	aldo-keto reductase family 1, member C-like [Rattus norvegicus]	2.59718	2.12405	5.64492	4.55745	0.462758	-1.11167	0.0366694	0.624803	down	yes
ENSRNOG00000000454	RT1-DOb	ENSRNOT00000000526;ENSRNOT00000092127;ENSRNOT00000085724	GO:0002504(antigen processing and presentation of peptide or polysaccharide antigen via MHC class II);GO:0002587(negative regulation of antigen processing and presentation of peptide antigen via MHC class II);GO:0005622(intracellular);GO:0005764(lysosome);GO:0006955(immune response);GO:0016021(integral component of membrane);GO:0023026(MHC class II protein complex binding);GO:0042613(MHC class II…	04514(Cell adhesion molecules (CAMs));04145(Phagosome);04612(Antigen processing and presentation);04672(Intestinal immune network for IgA production);05310(Asthma);05322(Systemic lupus erythematosus);05323(Rheumatoid arthritis);05320(Autoimmune thyroid disease);05321(Inflammatiory bowel disease (IBD));05330(Allograft rejection);05332(Graft-versus-host disease);05416(Viral myocarditis);04940(Type …	K06752	NA	RT1-DOb [Rattus norvegicus]	0.341638	0.518204	1.55453	0.956086	0.342483	-1.5459	0.0367723	0.624803	down	yes
ENSRNOG00000003217	Lgals3bp	ENSRNOT00000004320	GO:0005044(scavenger receptor activity);GO:0005578(proteinaceous extracellular matrix);GO:0005615(extracellular space);GO:0006898(receptor-mediated endocytosis);GO:0007155(cell adhesion);GO:0016020(membrane);GO:0031012(extracellular matrix);GO:0070062(extracellular exosome);GO:0072562(blood microparticle)	04970(Salivary secretion)	K13912	NA	lectin, galactoside-binding, soluble, 3 binding protein, isoform CRA_a [Rattus norvegicus]	65.2225	13.8612	16.9719	16.486	2.36368	1.24103	0.0368052	0.624803	up	yes
ENSRNOG00000012747	Spock1	ENSRNOT00000061187	GO:0004869(cysteine-type endopeptidase inhibitor activity);GO:0005509(calcium ion binding);GO:0005578(proteinaceous extracellular matrix);GO:0005615(extracellular space);GO:0007165(signal transduction);GO:0008191(metalloendopeptidase inhibitor activity);GO:0010812(negative regulation of cell-substrate adhesion);GO:0010951(negative regulation of endopeptidase activity);GO:0010977(negative regulati…	04918(Thyroid hormone synthesis);05320(Autoimmune thyroid disease)	K10809	NA	testican-1 precursor [Rattus norvegicus]	1.07047	1.34213	0.364522	0.503468	2.77952	1.47484	0.0368919	0.624887	up	yes
ENSRNOG00000001123	RGD1562310	ENSRNOT00000001485	GO:0003674(molecular_function);GO:0005575(cellular_component);GO:0005576(extracellular region);GO:0008150(biological_process)	NA	NA	NA	UPF0454 protein C12orf49 homolog [Rattus norvegicus]	4.25744	1.64611	1.07266	1.44675	2.34323	1.2285	0.0369275	0.624887	up	yes
ENSRNOG00000056825	AABR07072539.2	ENSRNOT00000087206	GO:0003735(structural constituent of ribosome);GO:0005840(ribosome);GO:0006412(translation)	03010(Ribosome)	K02934	NA	60S ribosomal protein L6 [Rattus norvegicus]	7.74934	2.41384	0.951869	2.59526	2.86518	1.51863	0.0370071	0.624887	up	yes
ENSRNOG00000023428	Pik3r5	ENSRNOT00000032785	GO:0005942(phosphatidylinositol 3-kinase complex);GO:0005944(phosphatidylinositol 3-kinase complex, class IB);GO:0043551(regulation of phosphatidylinositol 3-kinase activity);GO:0046935(1-phosphatidylinositol-3-kinase regulator activity)	04014(Ras signaling pathway);04015(Rap1 signaling pathway);04012(ErbB signaling pathway);04370(VEGF signaling pathway);04630(Jak-STAT signaling pathway);04668(TNF signaling pathway);04066(HIF-1 signaling pathway);04068(FoxO signaling pathway);04070(Phosphatidylinositol signaling system);04072(Phospholipase D signaling pathway);04071(Sphingolipid signaling pathway);04024(cAMP signaling pathway);04…	K02649	NA	phosphoinositide 3-kinase regulatory subunit 5 [Rattus norvegicus]	2.21243	0.916694	0.3696	0.912598	2.44044	1.28714	0.0376691	0.629672	up	yes
ENSRNOG00000033517	LOC100360791	ENSRNOT00000044222	GO:0005509(calcium ion binding);GO:0005515(protein binding);GO:0005615(extracellular space);GO:0005634(nucleus);GO:0005654(nucleoplasm);GO:0005737(cytoplasm);GO:0005771(multivesicular body);GO:0008134(transcription factor binding);GO:0019827(stem cell population maintenance);GO:0044822(poly(A) RNA binding);GO:0045298(tubulin complex);GO:0070062(extracellular exosome);GO:1902230(negative regulatio…	NA	NA	NA	translationally-controlled tumor protein [Mus musculus]	56.9431	37.7496	138.129	54.5959	0.491335	-1.02522	0.0377255	0.629738	down	yes
ENSRNOG00000014336	Mcm5	ENSRNOT00000084271;ENSRNOT00000064731	GO:0000784(nuclear chromosome, telomeric region);GO:0003678(DNA helicase activity);GO:0003682(chromatin binding);GO:0003688(DNA replication origin binding);GO:0005524(ATP binding);GO:0005634(nucleus);GO:0005654(nucleoplasm);GO:0006270(DNA replication initiation);GO:0016020(membrane);GO:0032508(DNA duplex unwinding);GO:0042555(MCM complex);GO:0051301(cell division);GO:0051301(cell division)	03030(DNA replication);04110(Cell cycle);04110(Cell cycle)	K02209	EC:3.6.4.12	PREDICTED: DNA replication licensing factor MCM5 isoform X1 [Rattus norvegicus]	1.19609	0.514905	0.194824	0.395718	2.89732	1.53472	0.0378693	0.630071	up	yes
ENSRNOG00000052226	LOC108348144	ENSRNOT00000081761;ENSRNOT00000092639	GO:0005739(mitochondrion);GO:0005747(mitochondrial respiratory chain complex I);GO:0016021(integral component of membrane);GO:0031966(mitochondrial membrane);GO:0031966(mitochondrial membrane)	00190(Oxidative phosphorylation);05010(Alzheimer's disease);05012(Parkinson's disease);05016(Huntington's disease);04932(Non-alcoholic fatty liver disease (NAFLD));04932(Non-alcoholic fatty liver disease (NAFLD))	K03945	NA	PREDICTED: NADH dehydrogenase [ubiquinone] 1 alpha subcomplex subunit 1 isoform X1 [Rattus norvegicus]	4.95011	4.67172	5.65994	13.9212	0.491382	-1.02508	0.0379282	0.630071	down	yes
ENSRNOG00000027380	Upk1b	ENSRNOT00000004315	GO:0005887(integral component of plasma membrane);GO:0007166(cell surface receptor signaling pathway);GO:0016021(integral component of membrane);GO:0016324(apical plasma membrane);GO:0030855(epithelial cell differentiation);GO:0070062(extracellular exosome)	NA	NA	NA	PREDICTED: uroplakin-1b isoform X1 [Rattus norvegicus]	0.537474	1.5397	0.230159	0.442709	3.08704	1.62622	0.0379815	0.630071	up	yes
ENSRNOG00000029370	Abhd3	ENSRNOT00000041878	GO:0003674(molecular_function);GO:0004623(phospholipase A2 activity);GO:0005575(cellular_component);GO:0008150(biological_process);GO:0008970(phosphatidylcholine 1-acylhydrolase activity);GO:0016021(integral component of membrane);GO:0046470(phosphatidylcholine metabolic process)	NA	NA	NA	abhydrolase domain containing 3, partial [Mus musculus]	8.04343	0.028834	0.063899	0.847484	8.85716	3.14684	0.0380728	0.630071	up	yes
ENSRNOG00000006350	Tle6	ENSRNOT00000008360	GO:0005634(nucleus);GO:0005938(cell cortex);GO:0006355(regulation of transcription, DNA-templated);GO:0043234(protein complex);GO:0045666(positive regulation of neuron differentiation);GO:0050769(positive regulation of neurogenesis)	NA	NA	NA	PREDICTED: transducin-like enhancer protein 6 isoform X4 [Rattus norvegicus]	1.03478	0.676844	0.363676	0.214504	2.96037	1.56578	0.0382485	0.630071	up	yes
ENSRNOG00000014008	Mfsd2a	ENSRNOT00000019080	GO:0005548(phospholipid transporter activity);GO:0005737(cytoplasm);GO:0005886(plasma membrane);GO:0005887(integral component of plasma membrane);GO:0015293(symporter activity);GO:0015908(fatty acid transport);GO:0015914(phospholipid transport);GO:0045056(transcytosis);GO:0055085(transmembrane transport);GO:0060856(establishment of blood-brain barrier);GO:1990379(lipid transport across blood brai…	NA	NA	NA	sodium-dependent lysophosphatidylcholine symporter 1 [Rattus norvegicus]	74.1627	60.8045	59.1168	263.295	0.418617	-1.2563	0.0382578	0.630071	down	yes
ENSRNOG00000031950	Izumo4	ENSRNOT00000049766	GO:0005634(nucleus)	NA	NA	NA	PREDICTED: izumo sperm-egg fusion protein 4 isoform X1 [Rattus norvegicus]	3.60982	5.92683	1.53851	2.13148	2.59855	1.37771	0.038323	0.630071	up	yes
ENSRNOG00000039500	Rnase13	ENSRNOT00000060539	GO:0003676(nucleic acid binding);GO:0004519(endonuclease activity);GO:0004540(ribonuclease activity);GO:0005576(extracellular region)	NA	NA	NA	PREDICTED: probable inactive ribonuclease-like protein 13 isoform X1 [Rattus norvegicus]	2.78117	8.34231	1.92693	1.86204	2.93575	1.55373	0.0383811	0.630165	up	yes
ENSRNOG00000012083	St6galnac2	ENSRNOT00000016622	GO:0001574(ganglioside biosynthetic process);GO:0008373(sialyltransferase activity);GO:0009311(oligosaccharide metabolic process);GO:0018279(protein N-linked glycosylation via asparagine);GO:0030173(integral component of Golgi membrane);GO:0097503(sialylation)	00512(Mucin type O-glycan biosynthesis)	K03479	EC:2.4.99.3	alpha-N-acetylgalactosaminide alpha-2,6-sialyltransferase 2 [Rattus norvegicus]	1.02242	1.66933	0.607092	0.3672	2.76277	1.46612	0.0389718	0.63638	up	yes
ENSRNOG00000004692	A1bg	ENSRNOT00000006273;ENSRNOT00000092777	GO:0003674(molecular_function);GO:0005576(extracellular region);GO:0005615(extracellular space);GO:0008150(biological_process);GO:0070062(extracellular exosome);GO:0072562(blood microparticle);GO:0072562(blood microparticle)	04380(Osteoclast differentiation);04380(Osteoclast differentiation)	K06512	NA	liver regeneration-related protein 1 [Rattus norvegicus]	1082.13	633.243	2500.67	1040.23	0.484447	-1.04559	0.0396582	0.646183	down	yes
ENSRNOG00000024899	Cxcl13	ENSRNOT00000039383	GO:0002518(lymphocyte chemotaxis across high endothelial venule);GO:0005576(extracellular region);GO:0005615(extracellular space);GO:0005829(cytosol);GO:0006955(immune response);GO:0007166(cell surface receptor signaling pathway);GO:0007204(positive regulation of cytosolic calcium ion concentration);GO:0007267(cell-cell signaling);GO:0008009(chemokine activity);GO:0008201(heparin binding);GO:0010…	04060(Cytokine-cytokine receptor interaction);04062(Chemokine signaling pathway)	K10032	NA	PREDICTED: C-X-C motif chemokine 13 isoform X1 [Rattus norvegicus]	1.76124	0.914153	2.92338	3.83291	0.395986	-1.33648	0.0397729	0.646183	down	yes
ENSRNOG00000010794	Dennd3	ENSRNOT00000014541	GO:0005622(intracellular);GO:0008333(endosome to lysosome transport);GO:0017112(Rab guanyl-nucleotide exchange factor activity);GO:0043547(positive regulation of GTPase activity);GO:0044257(cellular protein catabolic process)	NA	NA	NA	PREDICTED: DENN domain-containing protein 3 isoform X1 [Rattus norvegicus]	1.3412	1.29689	0.656271	0.624158	2.06031	1.04286	0.0397911	0.646183	up	yes
ENSRNOG00000004686	Spop	ENSRNOT00000077625;ENSRNOT00000006230	GO:0005634(nucleus);GO:0016567(protein ubiquitination);GO:0016607(nuclear speck);GO:0031463(Cul3-RING ubiquitin ligase complex);GO:0031625(ubiquitin protein ligase binding);GO:0043161(proteasome-mediated ubiquitin-dependent protein catabolic process);GO:0043161(proteasome-mediated ubiquitin-dependent protein catabolic process)	04120(Ubiquitin mediated proteolysis);04120(Ubiquitin mediated proteolysis)	K03876	NA	speckle-type POZ protein, isoform CRA_b, partial [Mus musculus]	14.0569	4.51954	3.64777	5.2752	2.08187	1.05788	0.0399605	0.646535	up	yes
ENSRNOG00000001309	Camkk2	ENSRNOT00000001774	GO:0004672(protein kinase activity);GO:0004674(protein serine/threonine kinase activity);GO:0004683(calmodulin-dependent protein kinase activity);GO:0005509(calcium ion binding);GO:0005516(calmodulin binding);GO:0005524(ATP binding);GO:0005634(nucleus);GO:0005737(cytoplasm);GO:0006468(protein phosphorylation);GO:0030295(protein kinase activator activity);GO:0032147(activation of protein kinase ac…	04152(AMPK signaling pathway);04920(Adipocytokine signaling pathway);04921(Oxytocin signaling pathway);04211(Longevity regulating pathway - mammal);05034(Alcoholism)	K07359	EC:2.7.11.17	calcium/calmodulin-dependent protein kinase kinase 2 [Rattus norvegicus]	0.812342	0.777896	0.199548	0.369161	2.79622	1.48348	0.0399708	0.646535	up	yes
ENSRNOG00000008400	Pml	ENSRNOT00000043434	GO:0000784(nuclear chromosome, telomeric region);GO:0001666(response to hypoxia);GO:0001932(regulation of protein phosphorylation);GO:0002230(positive regulation of defense response to virus by host);GO:0003674(molecular_function);GO:0003713(transcription coactivator activity);GO:0005515(protein binding);GO:0005575(cellular_component);GO:0005634(nucleus);GO:0005654(nucleoplasm);GO:0005730(nucleol…	04120(Ubiquitin mediated proteolysis);04144(Endocytosis);05200(Pathways in cancer);05202(Transcriptional misregulation in cancers);05221(Acute myeloid leukemia);05164(Influenza A);05168(Herpes simplex infection)	K10054	NA	PREDICTED: protein PML, partial [Rattus norvegicus]	4.44225	2.05989	1.82618	1.13208	2.19796	1.13616	0.0400287	0.646601	up	yes
ENSRNOG00000022009	Mzb1	ENSRNOT00000036301	GO:0002642(positive regulation of immunoglobulin biosynthetic process);GO:0003674(molecular_function);GO:0005575(cellular_component);GO:0005576(extracellular region);GO:0005737(cytoplasm);GO:0005788(endoplasmic reticulum lumen);GO:0008150(biological_process);GO:0008284(positive regulation of cell proliferation);GO:0030888(regulation of B cell proliferation);GO:0033622(integrin activation);GO:0034…	NA	NA	NA	marginal zone B- and B1-cell-specific protein precursor [Rattus norvegicus]	3.3247	1.94151	0.822225	1.12941	2.69835	1.43208	0.0407135	0.653776	up	yes
ENSRNOG00000002919	Gfap	ENSRNOT00000034401;ENSRNOT00000093266;ENSRNOT00000093167	GO:0001948(glycoprotein binding);GO:0005178(integrin binding);GO:0005198(structural molecule activity);GO:0005200(structural constituent of cytoskeleton);GO:0005622(intracellular);GO:0005737(cytoplasm);GO:0005882(intermediate filament);GO:0009611(response to wounding);GO:0010625(positive regulation of Schwann cell proliferation);GO:0010977(negative regulation of neuron projection development);GO:…	04630(Jak-STAT signaling pathway);04630(Jak-STAT signaling pathway)	K05640	NA	Glial fibrillary acidic protein [Cricetulus griseus]	0.944442	1.70014	0.480275	0.662769	2.31363	1.21016	0.0408316	0.653776	up	yes
ENSRNOG00000010392	Nrg1	ENSRNOT00000013991;ENSRNOT00000058727;ENSRNOT00000081522;ENSRNOT00000082355;ENSRNOT00000014268;ENSRNOT00000014147	GO:0000165(MAPK cascade);GO:0000187(activation of MAPK activity);GO:0000902(cell morphogenesis);GO:0001964(startle response);GO:0003161(cardiac conduction system development);GO:0003222(ventricular trabecula myocardium morphogenesis);GO:0003712(transcription cofactor activity);GO:0005102(receptor binding);GO:0005176(ErbB-2 class receptor binding);GO:0005178(integrin binding);GO:0005615(extracellu…	04012(ErbB signaling pathway);04012(ErbB signaling pathway)	K05455	NA	pro-neuregulin-1, membrane-bound isoform isoform 3 [Rattus norvegicus]	1.0916	0.527756	0.138219	0.464052	2.68875	1.42694	0.0408934	0.653776	up	yes
ENSRNOG00000006204	Slc30a3	ENSRNOT00000008126	GO:0005385(zinc ion transmembrane transporter activity);GO:0005737(cytoplasm);GO:0005765(lysosomal membrane);GO:0005770(late endosome);GO:0005886(plasma membrane);GO:0010043(response to zinc ion);GO:0016021(integral component of membrane);GO:0016023(cytoplasmic, membrane-bounded vesicle);GO:0030054(cell junction);GO:0030672(synaptic vesicle membrane);GO:0031902(late endosome membrane);GO:0043005(…	04141(Protein processing in endoplasmic reticulum)	K11718	EC:2.4.1.-	zinc transporter 3 [Rattus norvegicus]	2.57965	1.74386	1.1705	0.490574	2.60284	1.38009	0.0409087	0.653776	up	yes
ENSRNOG00000046643	Cyp3a9	ENSRNOT00000073099	GO:0004497(monooxygenase activity);GO:0005506(iron ion binding);GO:0005789(endoplasmic reticulum membrane);GO:0007608(sensory perception of smell);GO:0008395(steroid hydroxylase activity);GO:0009822(alkaloid catabolic process);GO:0010628(positive regulation of gene expression);GO:0016021(integral component of membrane);GO:0016491(oxidoreductase activity);GO:0016712(oxidoreductase activity, acting…	00140(Steroid hormone biosynthesis);00591(Linoleic acid metabolism);00830(Retinol metabolism);05204(Chemical carcinogenesis)	K07424	EC:1.14.14.1	cytochrome P450 3A9 [Rattus norvegicus]	31.8382	15.9621	70.6415	28.0018	0.484578	-1.0452	0.0416842	0.661574	down	yes
ENSRNOG00000020517	Prrg2	ENSRNOT00000082560;ENSRNOT00000027849	GO:0005509(calcium ion binding);GO:0005576(extracellular region);GO:0016021(integral component of membrane);GO:0016021(integral component of membrane)	04610(Complement and coagulation cascades);04610(Complement and coagulation cascades)	K01314	EC:3.4.21.6	transmembrane gamma-carboxyglutamic acid protein 2 precursor [Rattus norvegicus]	2.45819	2.24013	4.91953	5.04552	0.47148	-1.08473	0.0416883	0.661574	down	yes
ENSRNOG00000018969	Gpatch4	ENSRNOT00000056923	GO:0002244(hematopoietic progenitor cell differentiation);GO:0003676(nucleic acid binding);GO:0044822(poly(A) RNA binding)	NA	NA	NA	G patch domain-containing protein 4 [Rattus norvegicus]	2.31651	2.16473	2.26275	8.68829	0.409207	-1.2891	0.0419957	0.663304	down	yes
ENSRNOG00000026186	Syde2	ENSRNOT00000036282	GO:0005737(cytoplasm);GO:0007165(signal transduction);GO:0043087(regulation of GTPase activity)	05200(Pathways in cancer);05220(Chronic myeloid leukemia)	K08878	EC:2.7.11.1	PREDICTED: rho GTPase-activating protein SYDE2 isoform X1 [Rattus norvegicus]	1.1843	2.28266	0.773375	0.784688	2.22518	1.15392	0.0421248	0.663304	up	yes
ENSRNOG00000019189	Acat2	ENSRNOT00000033408	GO:0016747(transferase activity, transferring acyl groups other than amino-acyl groups)	01200(Carbon metabolism);01212(Fatty acid metabolism);00620(Pyruvate metabolism);00630(Glyoxylate and dicarboxylate metabolism);00640(Propanoate metabolism);00650(Butanoate metabolism);00071(Fatty acid degradation);00072(Synthesis and degradation of ketone bodies);00280(Valine, leucine and isoleucine degradation);00310(Lysine degradation);00380(Tryptophan metabolism);00900(Terpenoid backbone bios…	K00626	EC:2.3.1.9	acetyl-CoA acetyltransferase, cytosolic [Rattus norvegicus]	0.822969	1.48858	4.27068	1.68528	0.388107	-1.36548	0.042168	0.663304	down	yes
ENSRNOG00000001720	Hes1	ENSRNOT00000002346	GO:0000122(negative regulation of transcription from RNA polymerase II promoter);GO:0000785(chromatin);GO:0000981(RNA polymerase II transcription factor activity, sequence-specific DNA binding);GO:0001078(transcriptional repressor activity, RNA polymerase II core promoter proximal region sequence-specific binding);GO:0001701(in utero embryonic development);GO:0001889(liver development);GO:0003143…	03460(Fanconi anemia pathway);04330(Notch signaling pathway);04950(Maturity onset diabetes of the young)	K06054	NA	transcription factor HES-1 [Rattus norvegicus]	31.7106	16.5191	4.65317	17.5398	2.1732	1.11982	0.0424994	0.667641	up	yes
ENSRNOG00000021916	Slc16a12	ENSRNOT00000030024	GO:0003674(molecular_function);GO:0005308(creatine transmembrane transporter activity);GO:0005575(cellular_component);GO:0005887(integral component of plasma membrane);GO:0008150(biological_process);GO:0015129(lactate transmembrane transporter activity);GO:0035879(plasma membrane lactate transport);GO:1902598(creatine transmembrane transport)	05230(Central carbon metabolism in cancer)	K08180	NA	monocarboxylate transporter 12 [Rattus norvegicus]	6.87596	13.8554	13.8751	30.2146	0.470208	-1.08863	0.0426873	0.669716	down	yes
ENSRNOG00000026504	Fam114a1	ENSRNOT00000002883	GO:0003674(molecular_function);GO:0005575(cellular_component);GO:0005737(cytoplasm);GO:0008150(biological_process)	NA	NA	NA	PREDICTED: protein NOXP20 isoform X1 [Rattus norvegicus]	2.70484	2.02303	1.21058	0.72614	2.44118	1.28758	0.0428501	0.670838	up	yes
ENSRNOG00000006622	Cry1	ENSRNOT00000009124	GO:0000122(negative regulation of transcription from RNA polymerase II promoter);GO:0000166(nucleotide binding);GO:0000989(transcription factor activity, transcription factor binding);GO:0001046(core promoter sequence-specific DNA binding);GO:0001047(core promoter binding);GO:0003690(double-stranded DNA binding);GO:0003904(deoxyribodipyrimidine photo-lyase activity);GO:0003914(DNA (6-4) photolyas…	04710(Circadian rhythm)	K02295	NA	cryptochrome-1 [Rattus norvegicus]	2.72761	2.25187	1.18496	1.25365	2.04193	1.02994	0.0428706	0.670838	up	yes
ENSRNOG00000006766	Laptm4b	ENSRNOT00000008969	GO:0006810(transport);GO:0012505(endomembrane system);GO:0016020(membrane);GO:0016021(integral component of membrane)	04142(Lysosome)	K12387	NA	lysosomal-associated transmembrane protein 4B [Rattus norvegicus]	2.3242	3.59851	8.60451	4.25877	0.460435	-1.11893	0.0429843	0.671741	down	yes
ENSRNOG00000017180	Slc17a2	ENSRNOT00000023241	GO:0005436(sodium:phosphate symporter activity);GO:0005887(integral component of plasma membrane);GO:0015321(sodium-dependent phosphate transmembrane transporter activity);GO:0035435(phosphate ion transmembrane transport);GO:0035725(sodium ion transmembrane transport);GO:0044341(sodium-dependent phosphate transport)	04142(Lysosome)	K12301	NA	sodium-dependent phosphate transport protein 3 [Rattus norvegicus]	17.9923	26.5744	27.2144	64.9696	0.483455	-1.04855	0.0431233	0.673037	down	yes
ENSRNOG00000005589	Dhrs7	ENSRNOT00000007645	GO:0016020(membrane);GO:0016491(oxidoreductase activity);GO:0055114(oxidation-reduction process)	00600(Sphingolipid metabolism)	K04708	EC:1.1.1.102	dehydrogenase/reductase SDR family member 7 [Rattus norvegicus]	2.80972	2.42069	8.34274	3.55013	0.439794	-1.1851	0.0433861	0.673693	down	yes
ENSRNOG00000056886	Mir291b	ENSRNOT00000092137	NA	NA	NA	NA		5.98723	6.57478	9.8305	28.09	0.331272	-1.59391	0.0434396	0.673693	down	yes
ENSRNOG00000012375	Inpp1	ENSRNOT00000016842	GO:0000287(magnesium ion binding);GO:0003674(molecular_function);GO:0004441(inositol-1,4-bisphosphate 1-phosphatase activity);GO:0005575(cellular_component);GO:0005737(cytoplasm);GO:0007165(signal transduction);GO:0008150(biological_process);GO:0046854(phosphatidylinositol phosphorylation);GO:0046855(inositol phosphate dephosphorylation)	00562(Inositol phosphate metabolism);04070(Phosphatidylinositol signaling system)	K01107	EC:3.1.3.57	inositol polyphosphate 1-phosphatase [Rattus norvegicus]	3.49653	3.32063	2.00435	1.14161	2.16695	1.11567	0.043446	0.673693	up	yes
ENSRNOG00000022623	Ttll12	ENSRNOT00000037710	GO:0006464(cellular protein modification process)	NA	NA	NA	tubulin tyrosine ligase-like family, member 12 (predicted) [Rattus norvegicus]	3.09236	2.43522	1.43198	1.23138	2.07542	1.0534	0.0435271	0.674081	up	yes
ENSRNOG00000047459	Hist1h1e	ENSRNOT00000072564	GO:0000122(negative regulation of transcription from RNA polymerase II promoter);GO:0000785(chromatin);GO:0000786(nucleosome);GO:0003677(DNA binding);GO:0005634(nucleus);GO:0005720(nuclear heterochromatin);GO:0005730(nucleolus);GO:0006334(nucleosome assembly);GO:0006357(regulation of transcription from RNA polymerase II promoter);GO:0016584(nucleosome positioning);GO:0030261(chromosome condensati…	05202(Transcriptional misregulation in cancers);05322(Systemic lupus erythematosus);05034(Alcoholism)	K11253	NA	histone H1.4 [Rattus norvegicus]	3.20973	4.29124	1.90573	0.650684	2.93418	1.55296	0.0437103	0.675125	up	yes
[truncated: 27 more rows]

## Sheet: Supplementary 1-L_Mid VS L_Con
DEGs with statistical differences between Mid and Con groups in liver samples
[truncated: 387 more rows]

[truncated: 16 more sheets: Supplementary 1-L_High VS L_Con, Supplementary 1-K_Low VS K_Con, Supplementary 1-K_Mid VS K_Con, Supplementary 1-K_High VS K_Con, Supplementary 2-L_Low VS L_Con, Supplementary 2-L_Mid VS L_Con, Supplementary 2-L_High VS L_Con, Supplementary 2-K_Low VS K_Con, Supplementary 2-K_Mid VS K_Con, Supplementary 2-K_High VS K_Con, Supplementary 3-L_High VS L_Con, Supplementary 3-L_Mid VS L_Con, Supplementary 3-L_Low VS L_Con, Supplementary 3-K_High VS K_Con, Supplementary 3-K_Mid VS K_Con, Supplementary 3-K_Low VS K_Con]
